# Supplementary material for: A library of new organofunctional silanes obtained by thiol-(meth)acrylate Michael addition reaction
Source: Royal Society of Chemistry journal article supplement (doi:10.1039/d3ra01583a), 2023-01-01
Supplement: d3ra01583a1.pdf [file d3ra01583a1.pdf]

## SUPPORTING INFORMATION

# A library of new organofunctional silanes obtained by thiol-(meth)acrylate Michael addition reaction

*Agnieszka Przybylska<sup>a</sup>, Anna Szymańska<sup>\*b</sup> and Hieronim Maciejewski<sup>a,b</sup>*

<sup>a</sup>Faculty of Chemistry, Adam Mickiewicz University, Uniwersytetu Poznańskiego 8, 61-614 Poznań, Poland

<sup>b</sup>Poznań Science and Technology Park, Adam Mickiewicz University Foundation, Rubież 46, 61-612 Poznań, Poland

\*E-mail: [anna.szymanska@ppnt.poznan.pl](mailto:anna.szymanska@ppnt.poznan.pl)

## Table of Contents

|                               |    |
|-------------------------------|----|
| <b>3a</b> .....               | 4  |
| Product characterization..... | 4  |
| NMR spectra.....              | 4  |
| FT-IR spectrum .....          | 6  |
| <b>3b</b> .....               | 6  |
| Product characterization..... | 6  |
| NMR spectra.....              | 7  |
| FT-IR spectrum .....          | 8  |
| <b>3c</b> .....               | 9  |
| Product characterization..... | 9  |
| NMR spectra.....              | 9  |
| FT-IR spectrum .....          | 11 |
| <b>3d</b> .....               | 11 |
| Product characterization..... | 11 |
| NMR spectra.....              | 12 |
| FT-IR spectrum .....          | 13 |
| <b>3e</b> .....               | 14 |
| Product characterization..... | 14 |
| NMR spectra.....              | 14 |
| FT-IR spectrum .....          | 16 |

|                                |    |
|--------------------------------|----|
| <b>3f</b> .....                | 16 |
| Product characterization ..... | 16 |
| NMR spectra.....               | 17 |
| FT-IR spectrum .....           | 18 |
| <b>3g</b> .....                | 19 |
| Product characterization ..... | 19 |
| NMR spectra.....               | 19 |
| FT-IR spectrum .....           | 21 |
| <b>3h</b> .....                | 21 |
| Product characterization ..... | 21 |
| NMR spectra.....               | 22 |
| FT-IR spectrum .....           | 23 |
| <b>3i</b> .....                | 24 |
| Product characterization ..... | 24 |
| NMR spectra.....               | 24 |
| FT-IR spectrum .....           | 26 |
| <b>3j</b> .....                | 26 |
| Product characterization ..... | 26 |
| NMR spectra.....               | 27 |
| FT-IR spectrum .....           | 28 |
| <b>3k</b> .....                | 29 |
| Product characterization ..... | 29 |
| NMR spectra.....               | 29 |
| FT-IR spectrum .....           | 31 |
| <b>3l</b> .....                | 31 |
| Product characterization ..... | 31 |
| NMR spectra.....               | 32 |
| FT-IR spectrum .....           | 33 |
| <b>3m</b> .....                | 34 |
| Product characterization ..... | 34 |
| NMR spectra.....               | 34 |
| FT-IR spectrum .....           | 36 |
| <b>3n</b> .....                | 36 |
| Product characterization ..... | 36 |
| NMR spectra.....               | 37 |
| FT-IR spectrum .....           | 38 |
| <b>3o</b> .....                | 39 |

|                                                                                                                                                                                      |    |
|--------------------------------------------------------------------------------------------------------------------------------------------------------------------------------------|----|
| Product characterization .....                                                                                                                                                       | 39 |
| NMR spectra .....                                                                                                                                                                    | 39 |
| FT-IR spectrum .....                                                                                                                                                                 | 41 |
| <b>Table S1.</b> Comparison of conditions of reactions and yields for the obtained alkoxy-silanes with the literature data .....                                                     | 41 |
| <b>Table S2.</b> Other examples (conditions and yields) of alkoxy-silanes obtained from 3-mercaptopropyltrialkoxysilane and functional group-containing (meth)acrylic acid esters... | 42 |

3a

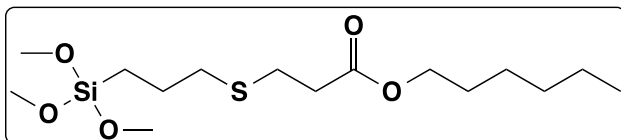

Product characterization

$^1\text{H NMR}$  (600 MHz,  $\text{CDCl}_3$ )  $\delta$  4.04 (t,  $J=6.8$  Hz, 2H,  $\text{C(O)OCH}_2$ ); 3.52 (s, 9H,  $\text{Si(OCH}_3)_3$ ); 2.73 (t,  $J=7.5$  Hz, 2H); 2.55 (t,  $J=7.5$  Hz, 2H), 2.51 (m, 2H) ( $\text{CH}_2\text{SCH}_2\text{CH}_2$ ); 1.65 (m, 2H,  $\text{SiCH}_2\text{CH}_2$ ); 1.58 (m, 2H,  $\text{C(O)OCH}_2\text{CH}_2$ ); 1.32 – 1.23 (m, 6H,  $\text{CH}_2$ ), 0.85 (t,  $J=6.9$  Hz, 3H,  $\text{CH}_3$ ); 0.71 (m, 2H,  $\text{SiCH}_2$ ) ppm.  $^{13}\text{C NMR}$  (151 MHz,  $\text{CDCl}_3$ )  $\delta$  172.10 ( $\text{C=O}$ ); 64.88 ( $\text{C(O)OCH}_2$ ); 50.57 ( $\text{Si(OCH}_3)_3$ ); 35.04, 31.47, 28.62, 26.90, 25.62, 22.98, 22.58 ( $\text{CH}_2$ ); 14.03 ( $\text{CH}_3$ ); 8.60 ( $\text{SiCH}_2$ ) ppm.  $^{29}\text{Si NMR}$  (79 MHz,  $\text{CDCl}_3$ )  $\delta$  -42.52 ( $\text{Si(OCH}_3)_3$ ) ppm.

NMR spectra

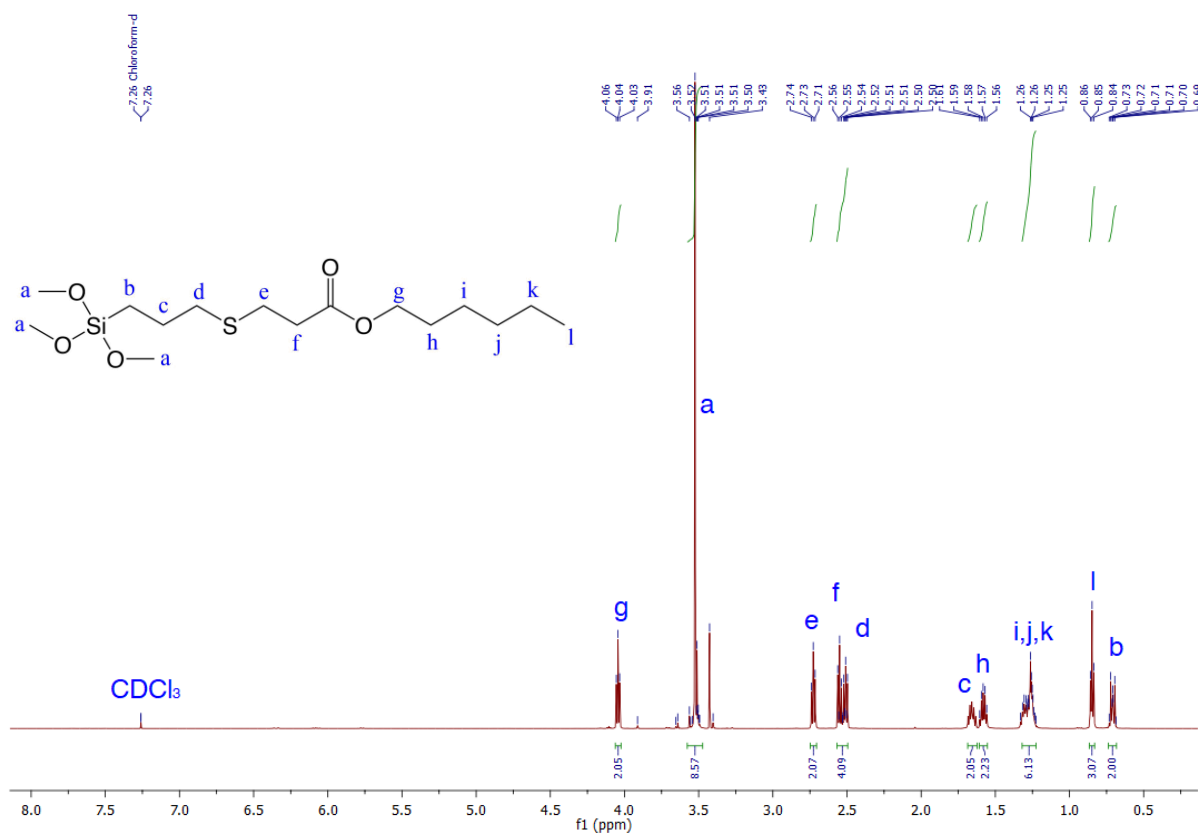

Figure 1.  $^1\text{H NMR}$  spectrum of 3a.

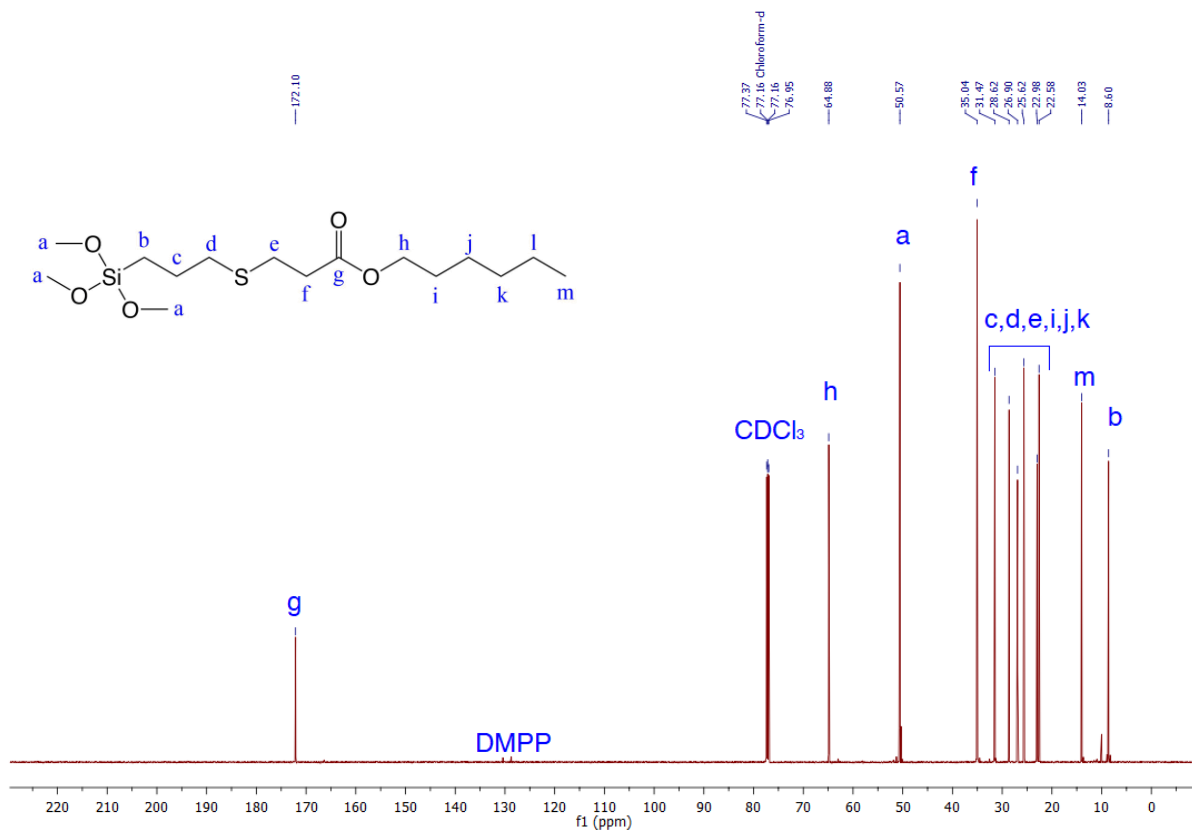

Figure 2. <sup>13</sup>C NMR spectrum of 3a.

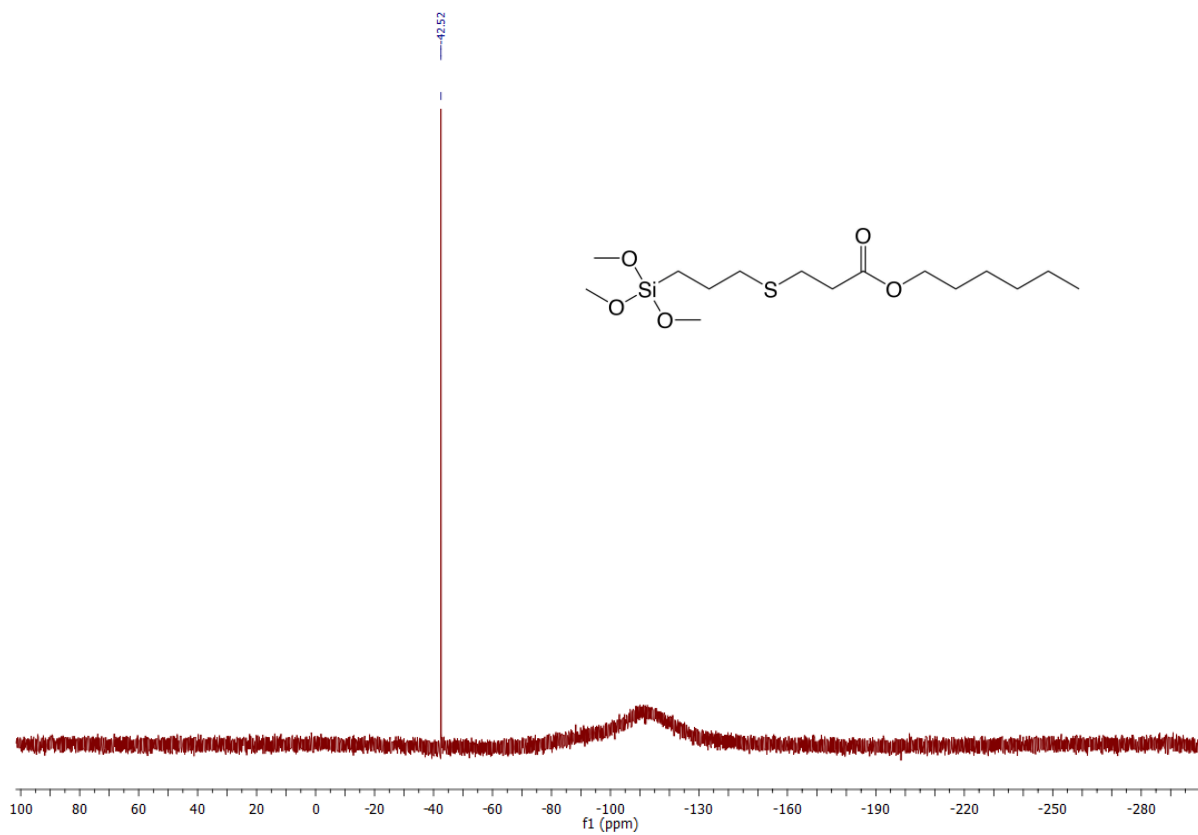

Figure 3. <sup>29</sup>Si NMR spectrum of 3a.

## FT-IR spectrum

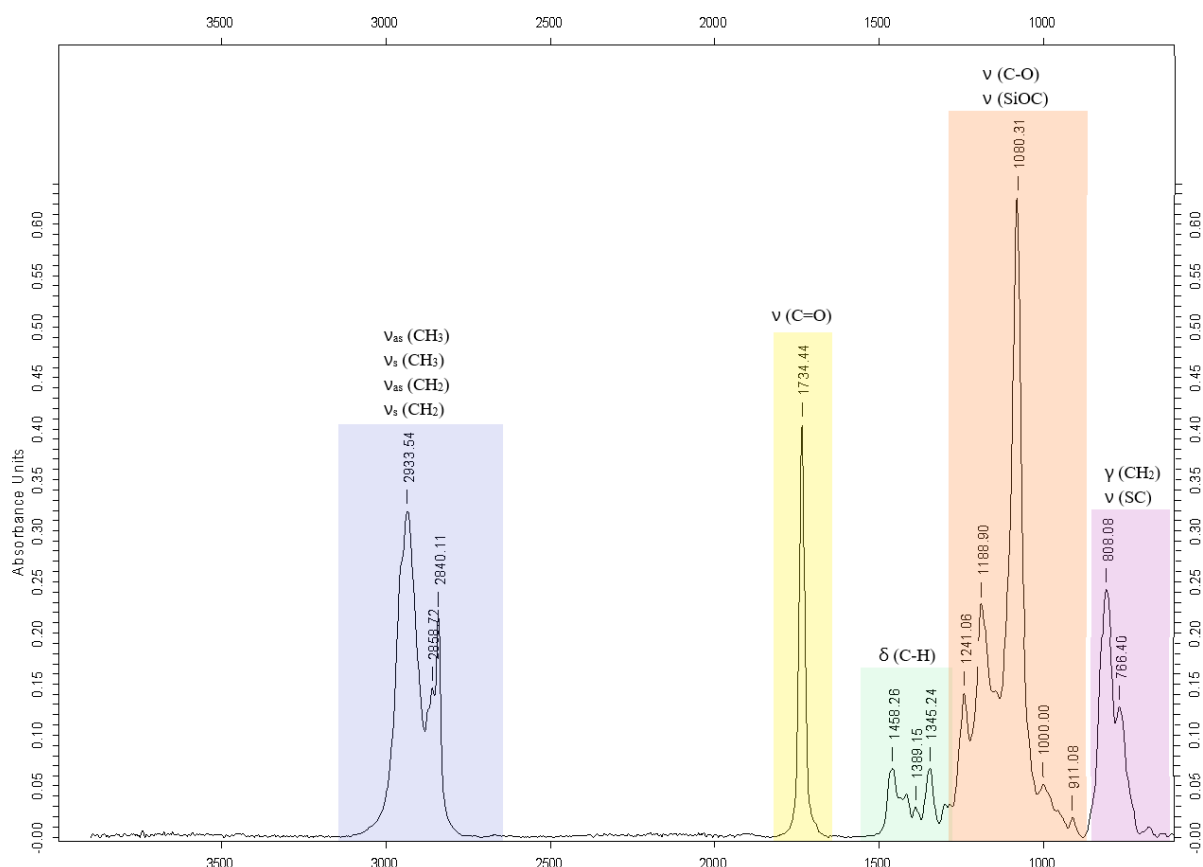

Figure 4. FT-IR spectrum of 3a.

### 3b

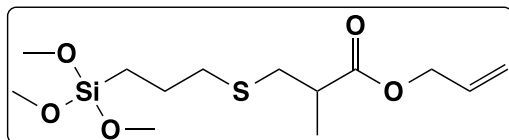

### Product characterization

**<sup>1</sup>H NMR** (400 MHz, CDCl<sub>3</sub>) δ 5.88 (ddt, *J*=17.2, 10.5, 5.7 Hz, 1H, (-CH=CH<sub>2</sub>)); 5.29 (dq, *J*=17.2, 1.6 Hz, 1H), 5.19 (dq, *J*=10.4, 1.3 Hz, 1H) (-CH=CH<sub>2</sub>); 4.56 (dt, *J*=5.7, 1.5 Hz, 2H, C(O)OCH<sub>2</sub>); 3.52 (s, 9H, Si(OCH<sub>3</sub>)<sub>3</sub>); 2.80 (m, 1H), 2.65 (sext, *J*=6.9 Hz, 1H), 2.56-2.48 (m, 3H) (CH<sub>2</sub>SCH<sub>2</sub>CH); 1.64 (m, 2H, SiCH<sub>2</sub>CH<sub>2</sub>); 1.22 (d, *J*=6.9 Hz, 3H, CHCH<sub>3</sub>); 0.70 (m, 2H, SiCH<sub>2</sub>) ppm. **<sup>13</sup>C NMR** (101 MHz, CDCl<sub>3</sub>) δ 174.85 (C=O); 132.21 (-CH=CH<sub>2</sub>); 118.16 (-CH=CH<sub>2</sub>); 65.23 (C(O)OCH<sub>2</sub>); 50.56 (Si(OCH<sub>3</sub>)<sub>3</sub>); 40.33 (CH<sub>2</sub>SCH<sub>2</sub>CH); 35.56, 35.33 (CH<sub>2</sub>SCH<sub>2</sub>); 23.01 (SiCH<sub>2</sub>CH<sub>2</sub>); 16.86 (CHCH<sub>3</sub>); 8.56 (SiCH<sub>2</sub>) ppm. **<sup>29</sup>Si NMR** (79 MHz, CDCl<sub>3</sub>) δ -42.49 (Si(OCH<sub>3</sub>)<sub>3</sub>) ppm.

# NMR spectra

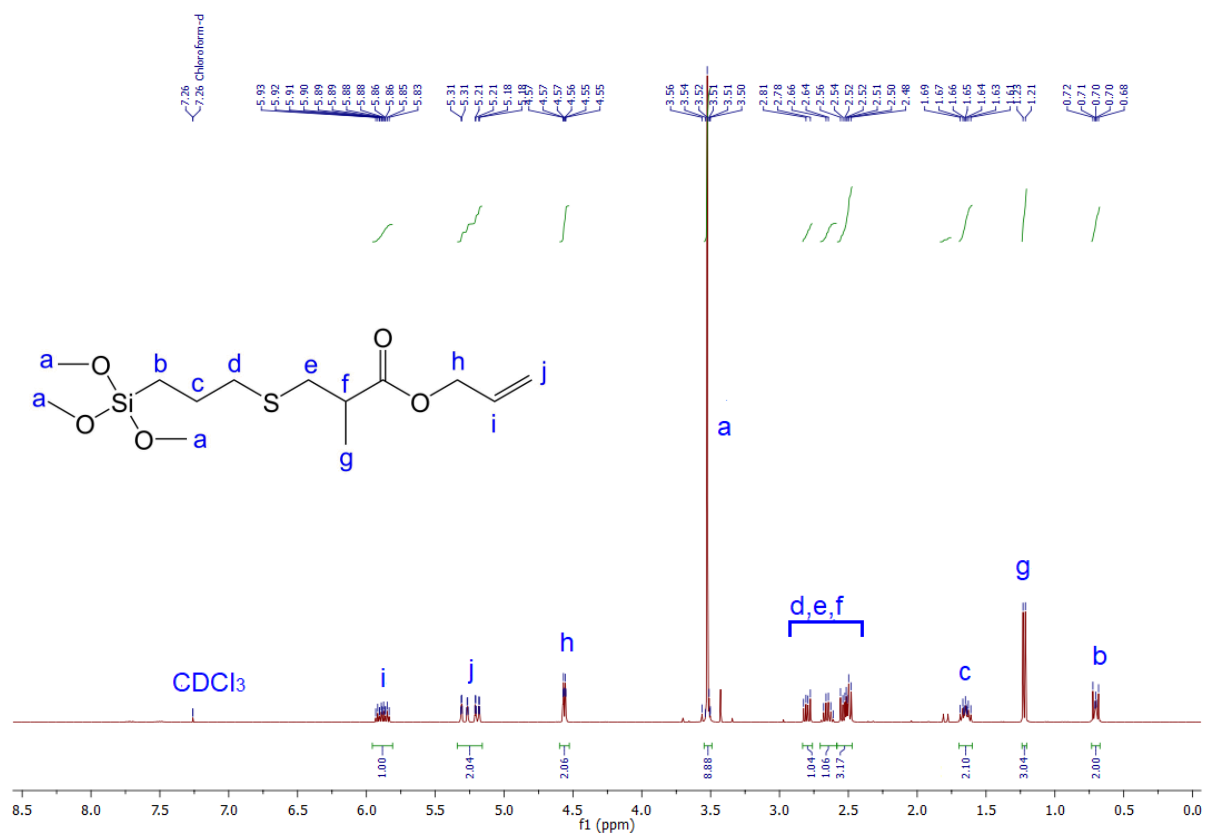

Figure 5. <sup>1</sup>H NMR spectrum of 3b.

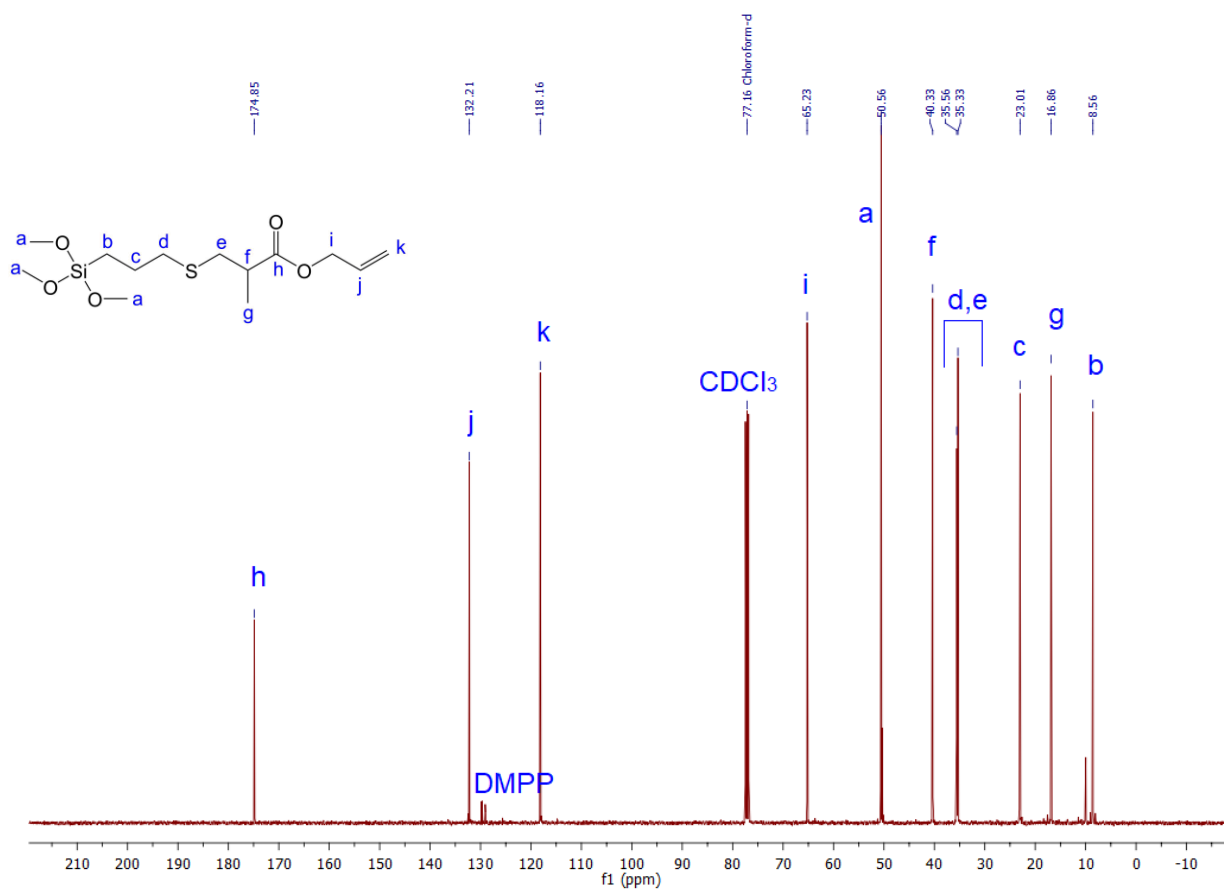

Figure 6. <sup>13</sup>C NMR spectrum of 3b.

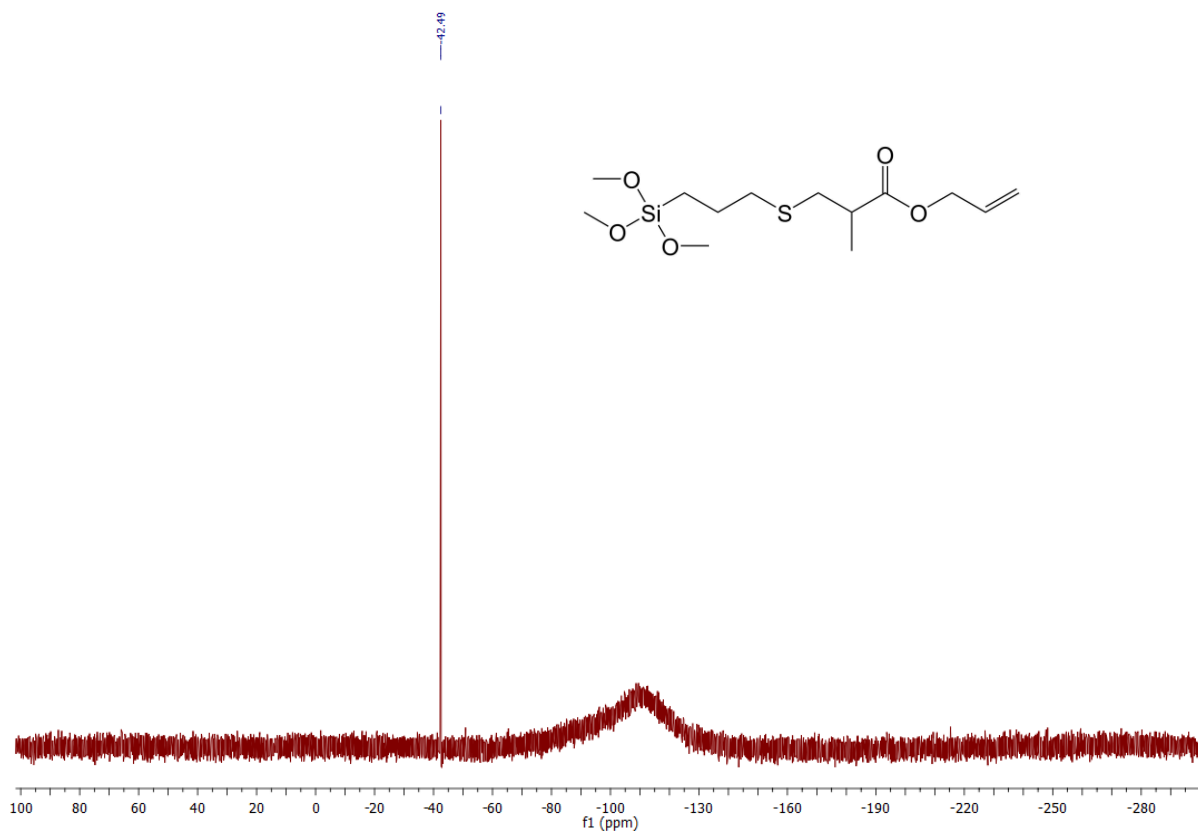

Figure 7.  $^{29}\text{Si}$  NMR spectrum of 3b.

### FT-IR spectrum

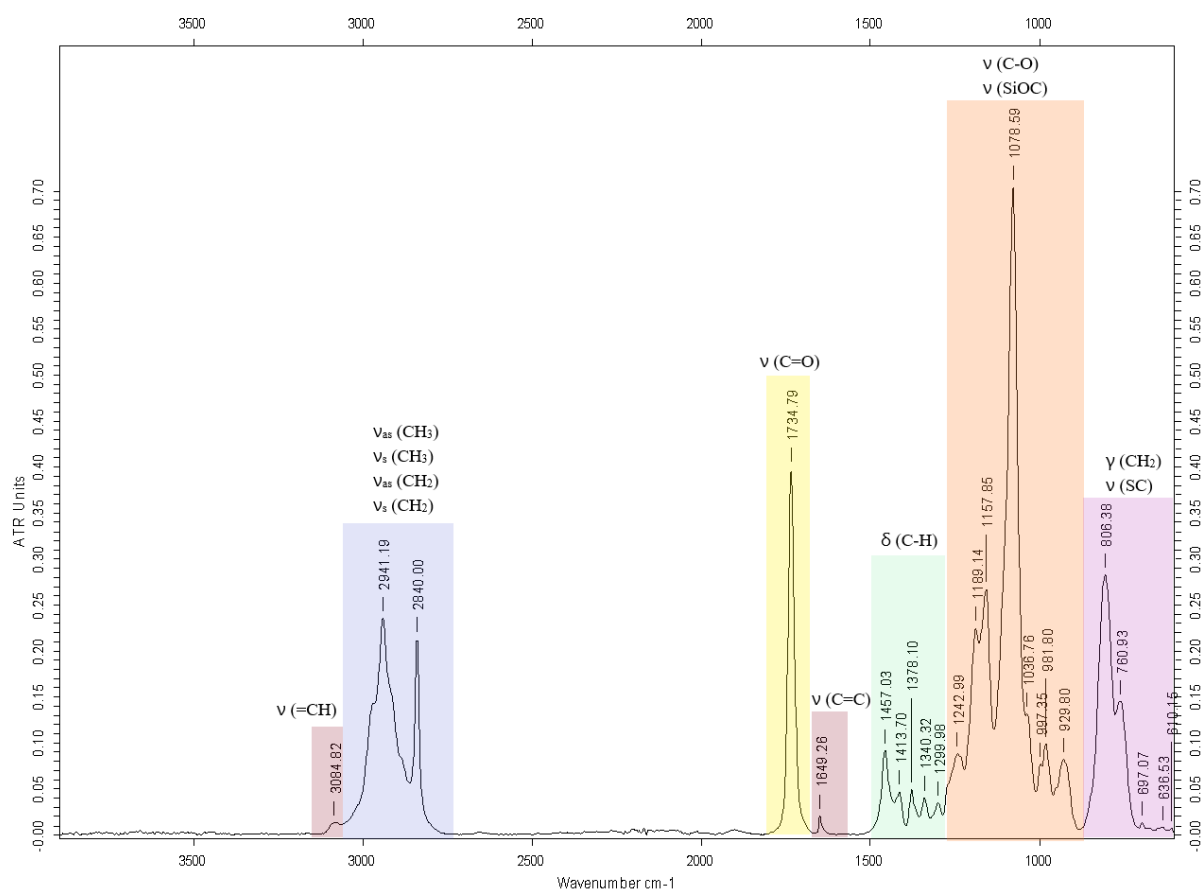

Figure 8. FT-IR spectrum of 3b.



**3c**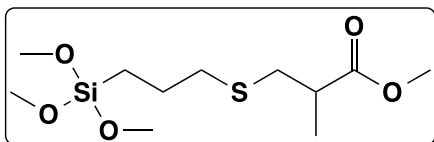

Product characterization

$^1\text{H NMR}$  (600 MHz,  $\text{CDCl}_3$ )  $\delta$  3.65 (s, 3H,  $\text{OCH}_3$ ); 3.52 (s, 9H,  $\text{Si}(\text{OCH}_3)_3$ ); 2.77 (dd,  $J=13.0, 7.1$  Hz, 1H), 2.62 (sext,  $J=7.0$  Hz, 1H), 2.53-2.47 (m, 3H) ( $\text{CH}_2\text{SCH}_2\text{CH}$ ); 1.63 (m, 2H,  $\text{SiCH}_2\text{CH}_2$ ); 1.20 (d,  $J=7.0$  Hz, 3H,  $\text{CHCH}_3$ ); 0.69 (m, 2H,  $\text{SiCH}_2$ ) ppm.  $^{13}\text{C NMR}$  (151 MHz,  $\text{CDCl}_3$ )  $\delta$  175.46 (C=O); 51.58 ( $\text{OCH}_3$ ); 50.35 ( $\text{Si}(\text{OCH}_3)_3$ ); 40.04 ( $\text{CHC}(\text{O})$ ); 35.35, 35.17 ( $\text{CH}_2\text{SCH}_2$ ); 22.81 ( $\text{SiCH}_2\text{CH}_2$ ); 16.63 ( $\text{CHCH}_3$ ); 8.36 ( $\text{SiCH}_2$ ) ppm.  $^{29}\text{Si NMR}$  (119 MHz,  $\text{CDCl}_3$ )  $\delta$  -42.49  $\text{Si}(\text{OCH}_3)_3$  ppm.

NMR spectra

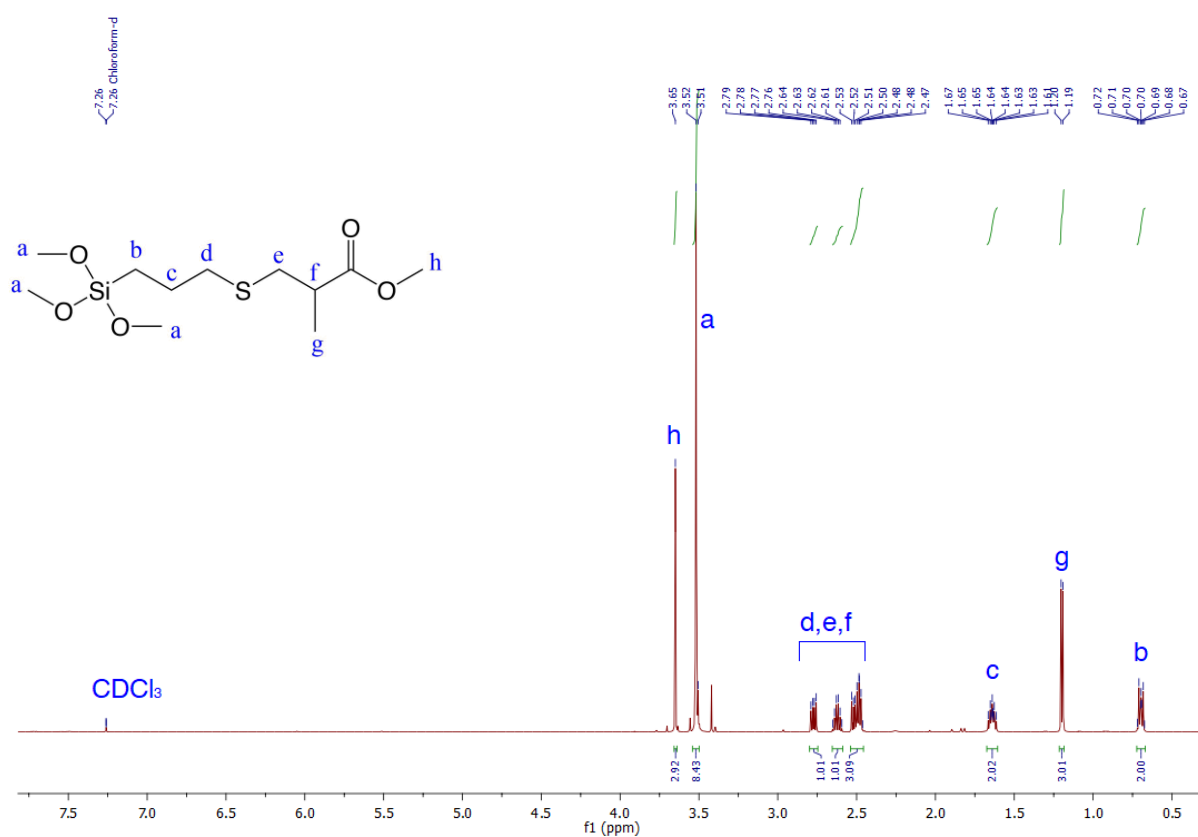Figure 9.  $^1\text{H NMR}$  spectrum of 3c.

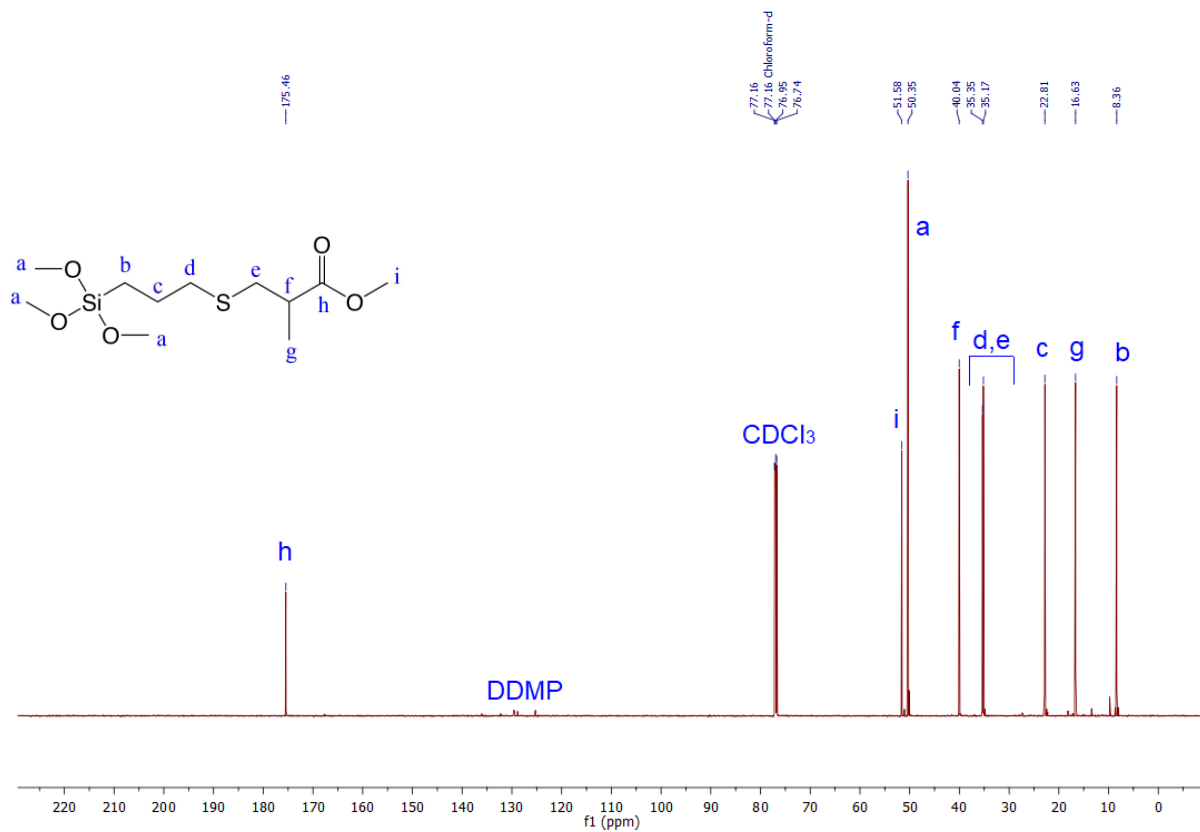

Figure 10. <sup>13</sup>C NMR spectrum of 3c.

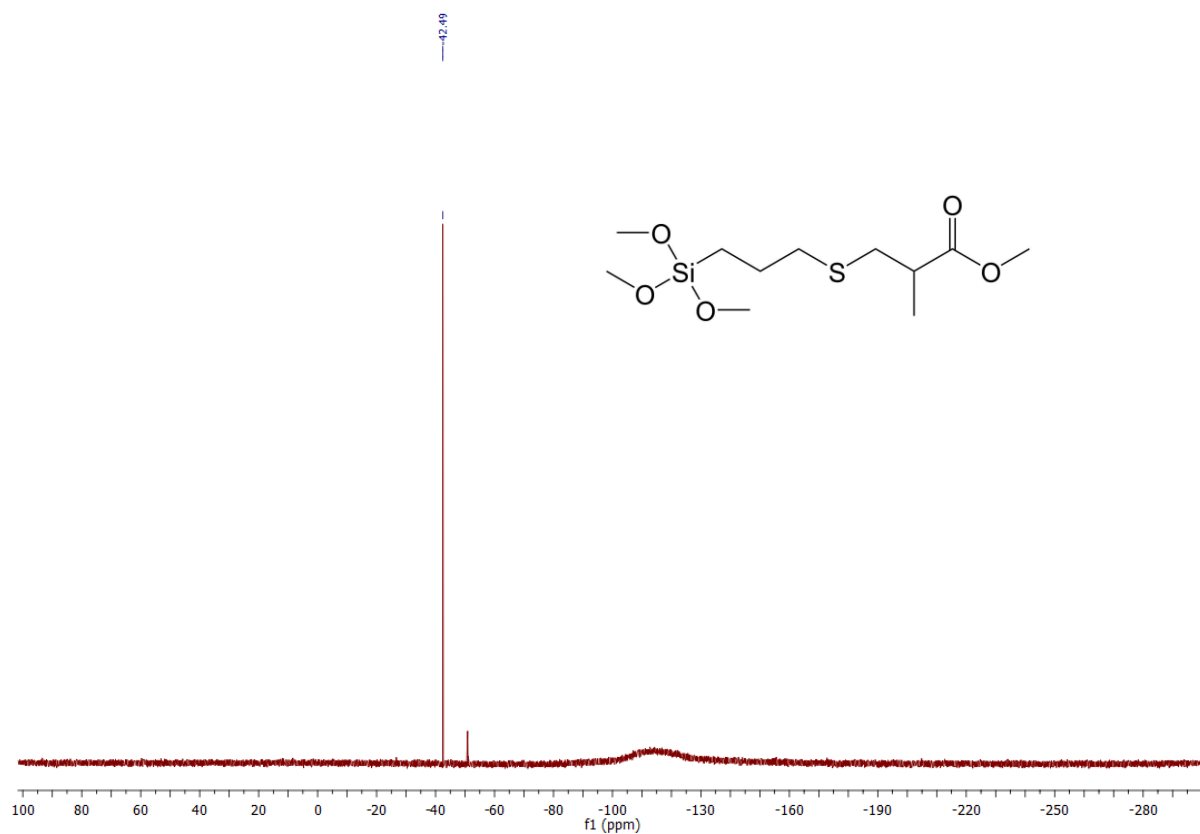

Figure 11. <sup>29</sup>Si NMR spectrum of 3c.

## FT-IR spectrum

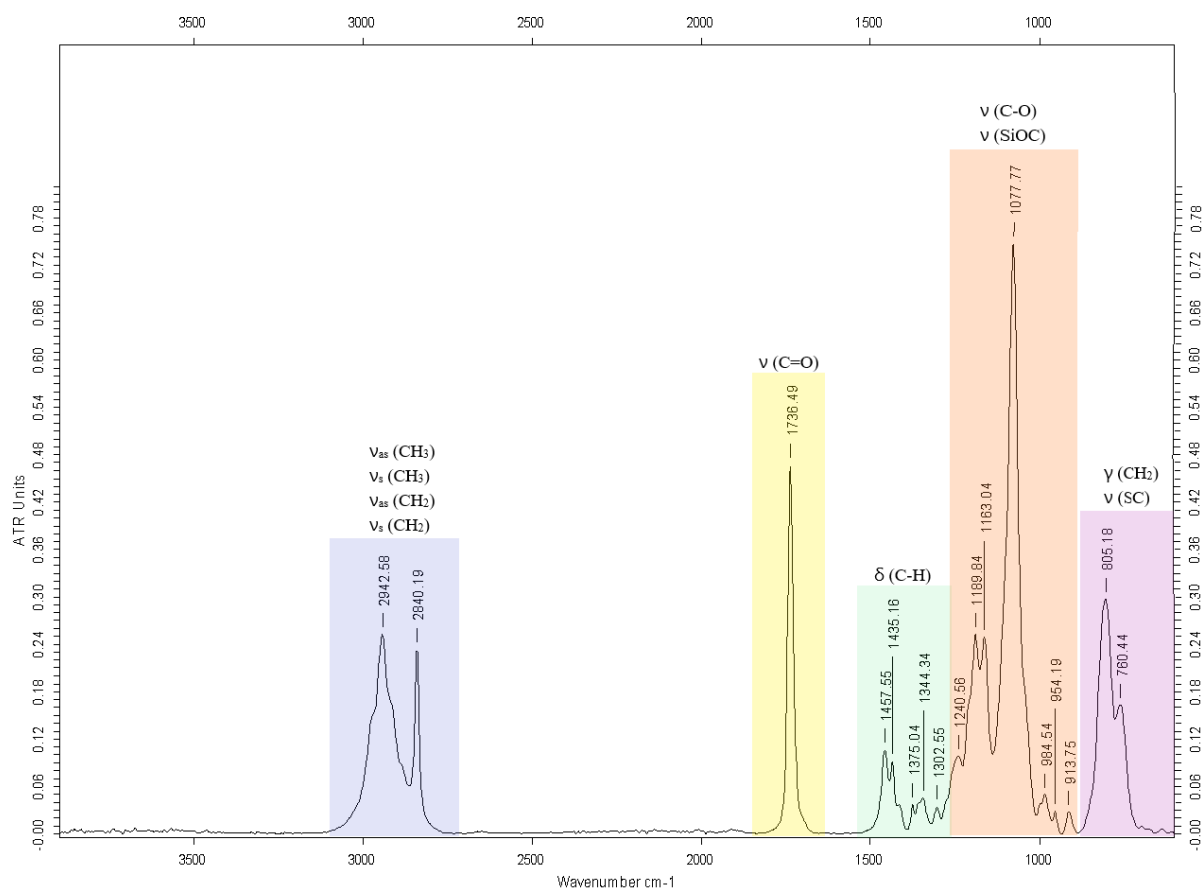

Figure 12. FT-IR spectrum of 3c.

### 3d

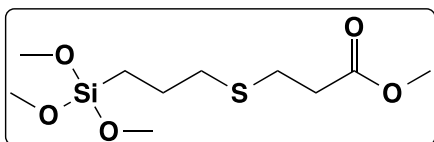

#### Product characterization

**<sup>1</sup>H NMR** (600 MHz, CDCl<sub>3</sub>) δ 3.64 (s, 3H, OCH<sub>3</sub>); 3.52 (s, 9H, Si(OCH<sub>3</sub>)<sub>3</sub>); 2.72 (t, *J*=7.4 Hz, 2H), 2.56 (t, *J*=7.4 Hz, 2H) 2.50 (m, 2H) (CH<sub>2</sub>SCH<sub>2</sub>CH<sub>2</sub>C(O)); 1.64 (m, 2H, SiCH<sub>2</sub>CH<sub>2</sub>); 0.70 (m, 2H, SiCH<sub>2</sub>) ppm. **<sup>13</sup>C NMR** (151 MHz, CDCl<sub>3</sub>) δ 172.44 (C=O); 51.76 (OCH<sub>3</sub>), 50.55 (Si(OCH<sub>3</sub>)<sub>3</sub>); 35.02, 34.77 (CH<sub>2</sub>SCH<sub>2</sub>); 26.82 (CH<sub>2</sub>C(O)); 22.95 (SiCH<sub>2</sub>CH<sub>2</sub>); 8.57 (SiCH<sub>2</sub>) ppm. **<sup>29</sup>Si NMR** (119 MHz, CDCl<sub>3</sub>) δ -42.52 Si(OCH<sub>3</sub>)<sub>3</sub> ppm.

# NMR spectra

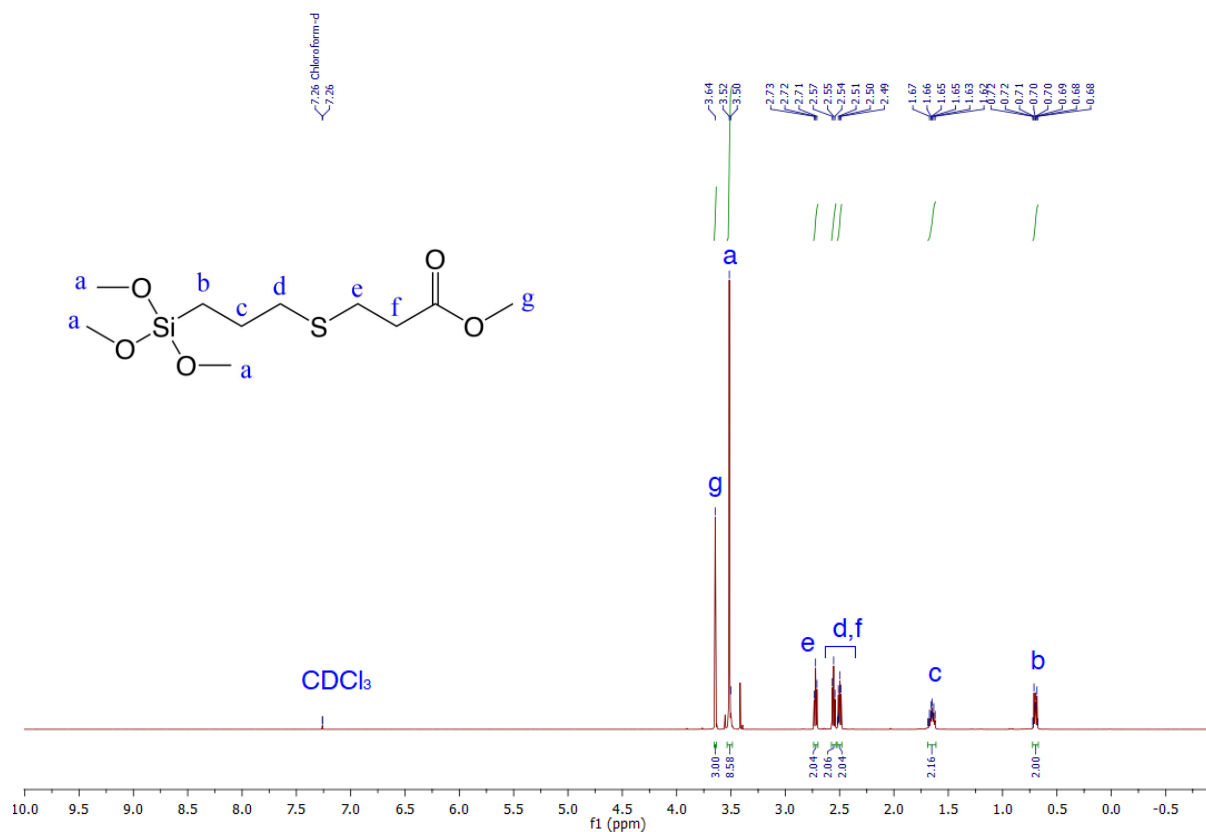

Figure 13. <sup>1</sup>H NMR spectrum of 3d.

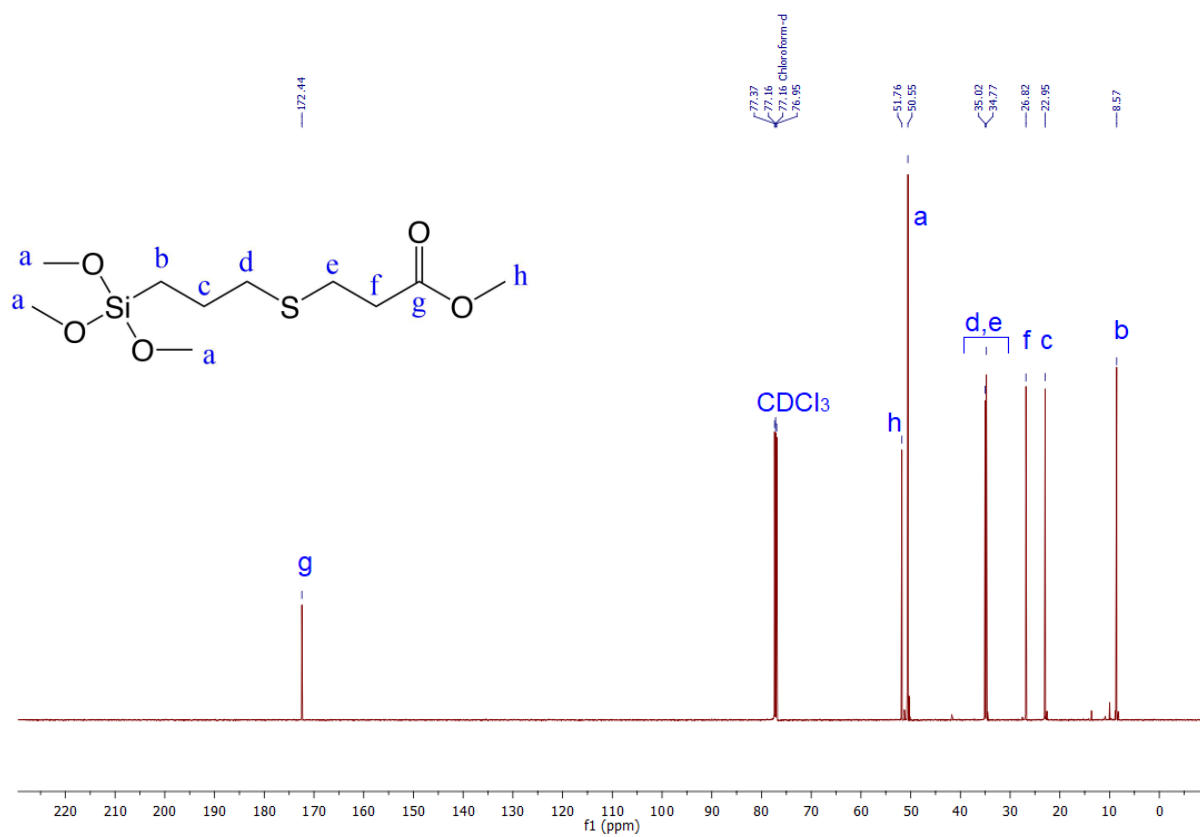

Figure 14. <sup>13</sup>C NMR spectrum of 3d.

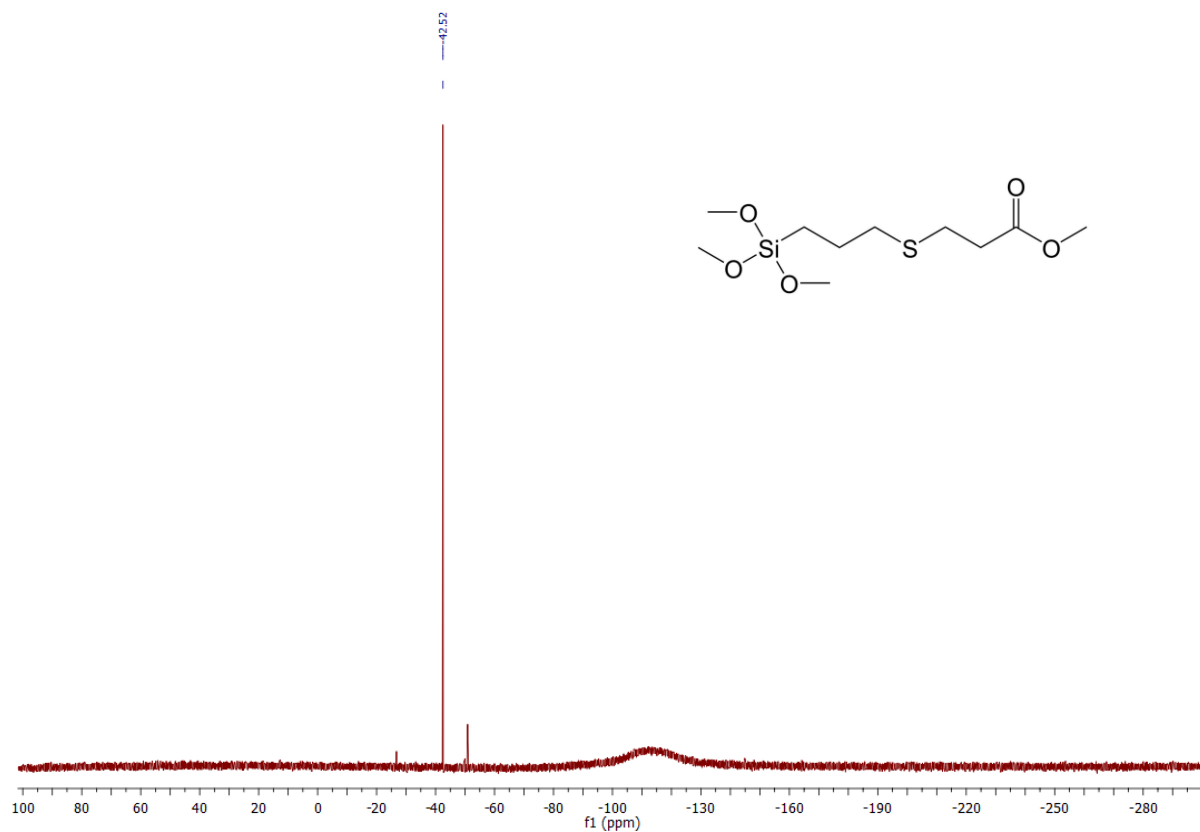

Figure 15.  $^{29}\text{Si}$  NMR spectrum of 3d.

### FT-IR spectrum

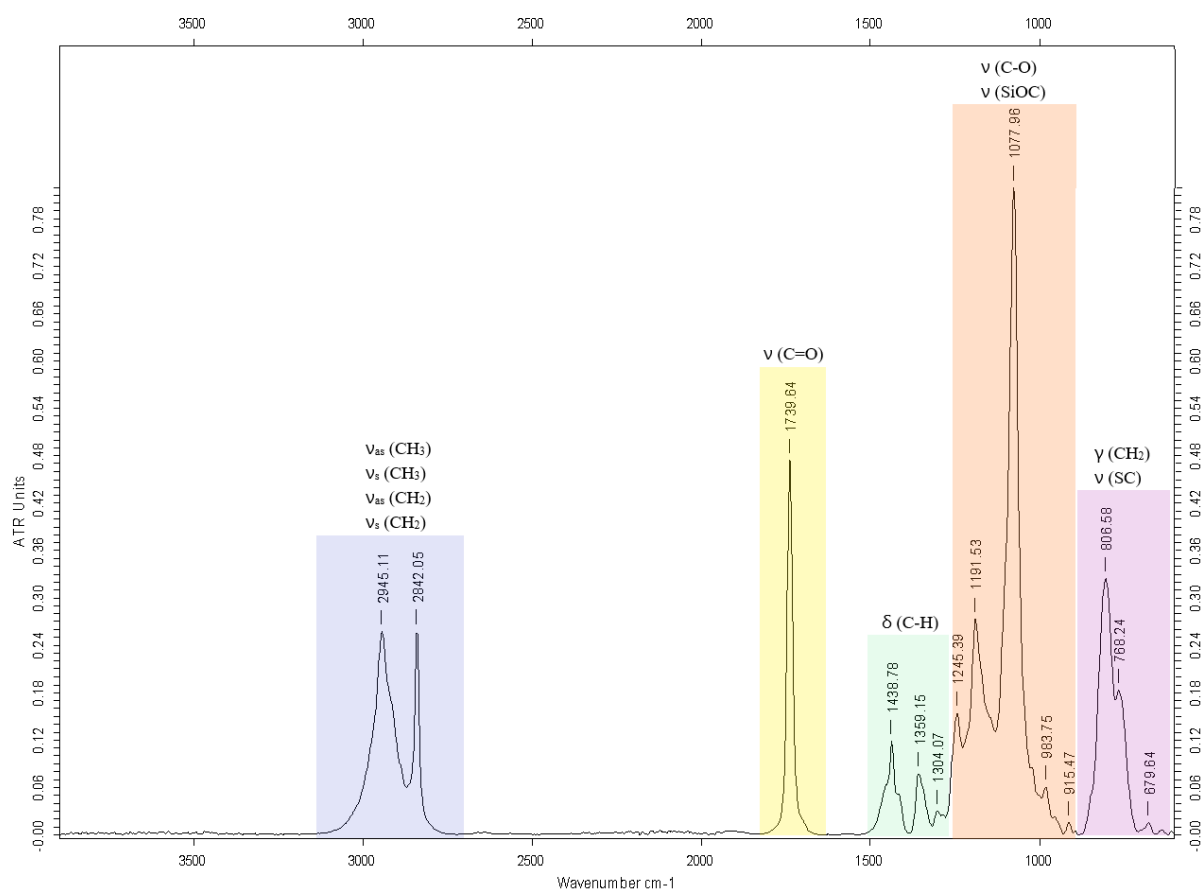

Figure 16. FT-IR spectrum of 3d.

**3e**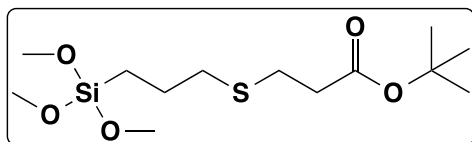

Product characterization

**<sup>1</sup>H NMR** (400 MHz, CDCl<sub>3</sub>) δ 3.53 (s, 9H, Si(OCH<sub>3</sub>)<sub>3</sub>); 2.69 (m, 2H), 2.49 (m, 4H) (CH<sub>2</sub>SCH<sub>2</sub>CH<sub>2</sub>); 1.66 (m, 2H, SiCH<sub>2</sub>CH<sub>2</sub>); 1.41 (m, 9H, CH<sub>3</sub>); 0.71 (m, 2H, SiCH<sub>2</sub>) ppm. **<sup>13</sup>C NMR** (101 MHz, CDCl<sub>3</sub>) δ 171.15 (C=O); 80.56 (C(CH<sub>3</sub>)<sub>3</sub>); 50.37 (Si(OCH<sub>3</sub>)<sub>3</sub>); 35.99, 34.84 (CH<sub>2</sub>SCH<sub>2</sub>); 27.93 (CH<sub>3</sub>); 26.85 (SCH<sub>2</sub>CH<sub>2</sub>); 22.80 (SiCH<sub>2</sub>CH<sub>2</sub>) 8.39 (SiCH<sub>2</sub>) ppm. **<sup>29</sup>Si NMR** (79 MHz, CDCl<sub>3</sub>) δ -42.48 (Si(OCH<sub>3</sub>)<sub>3</sub>) ppm.

NMR spectra

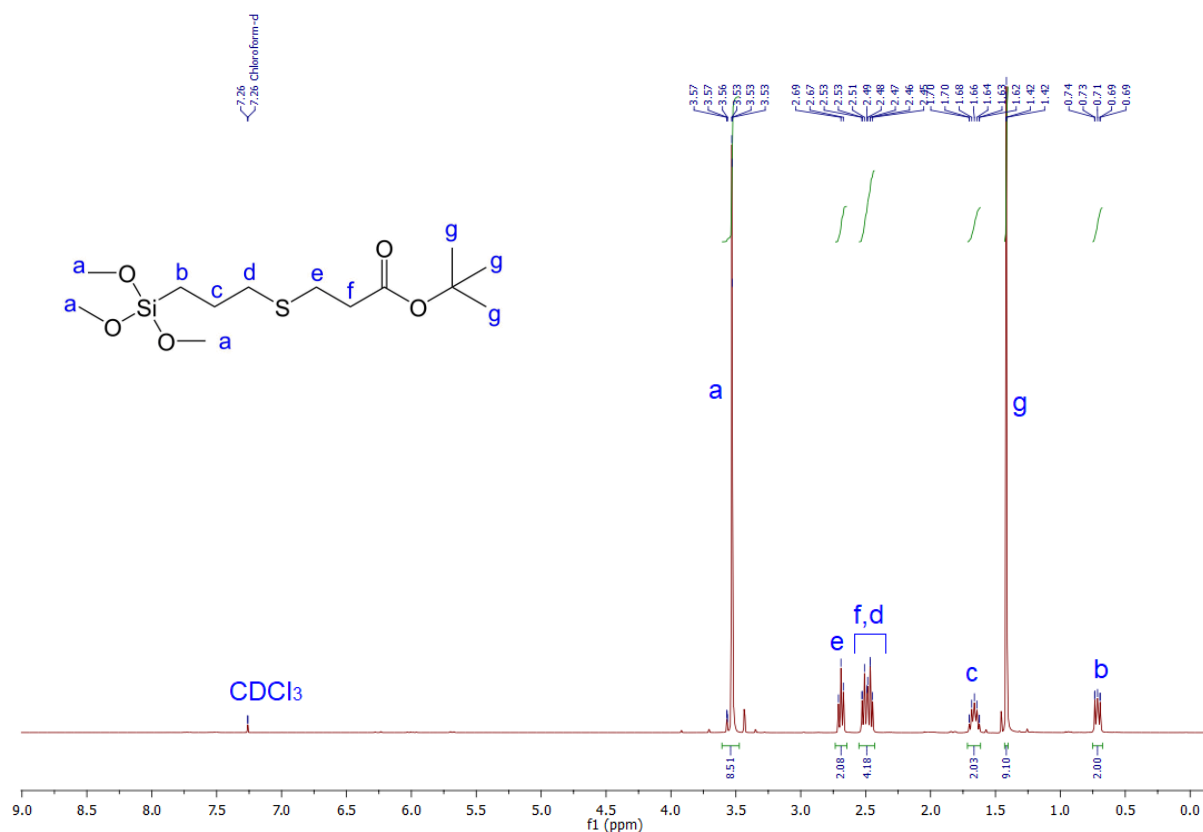**Figure 17.** <sup>1</sup>H NMR spectrum of 3e.

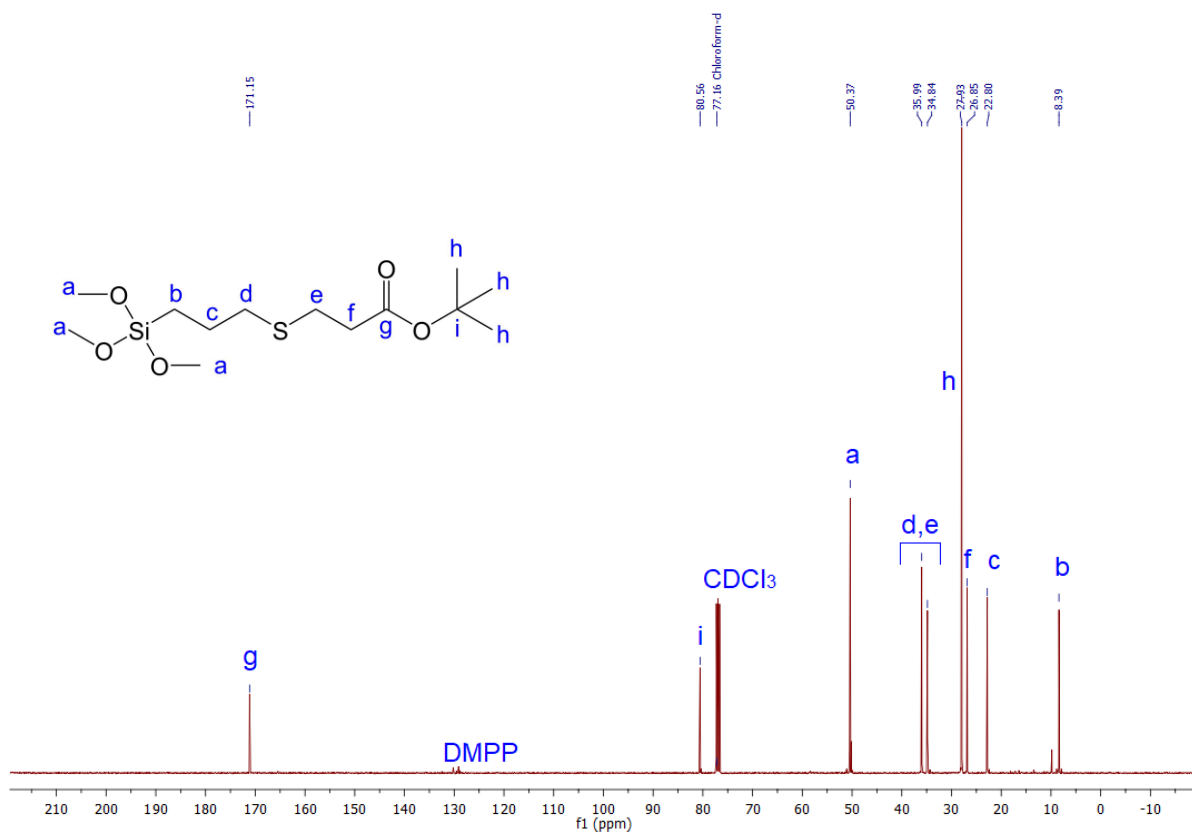

Figure 18. <sup>13</sup>C NMR spectrum of 3e.

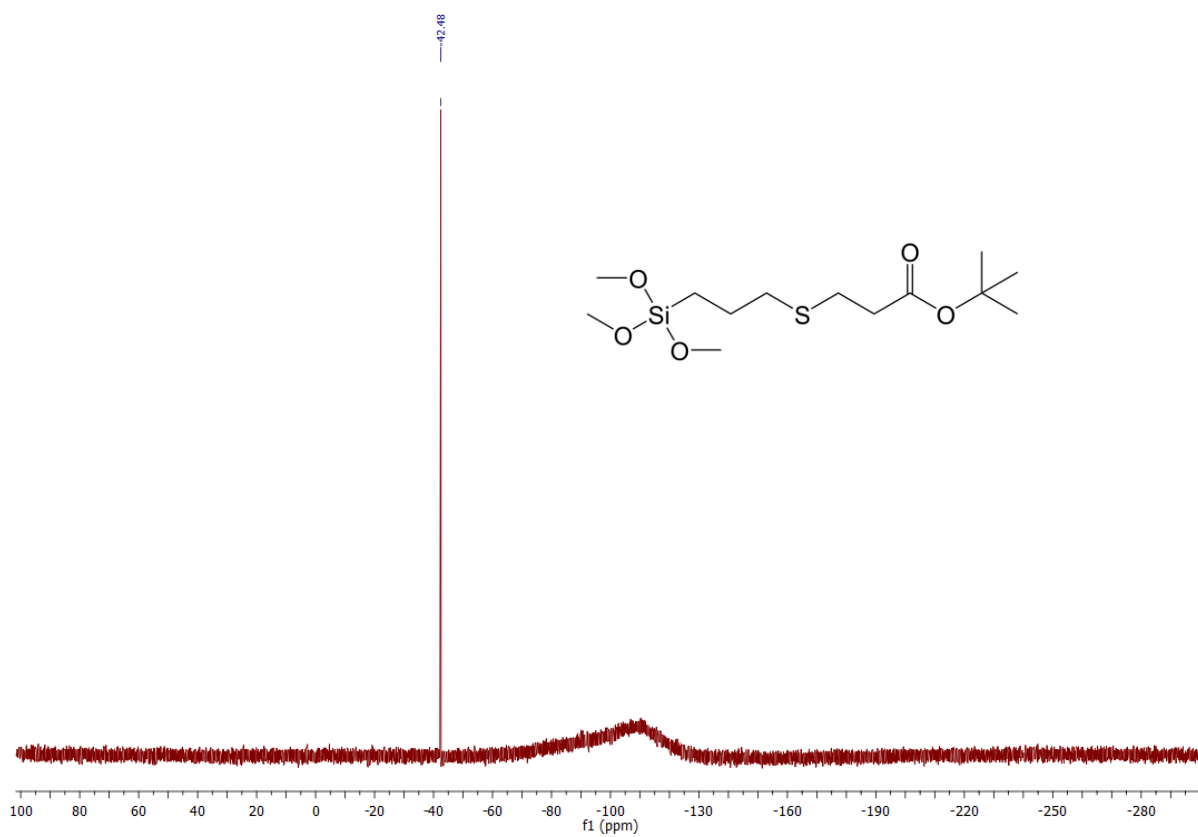

Figure 19. <sup>29</sup>Si NMR spectrum of 3e.

## FT-IR spectrum

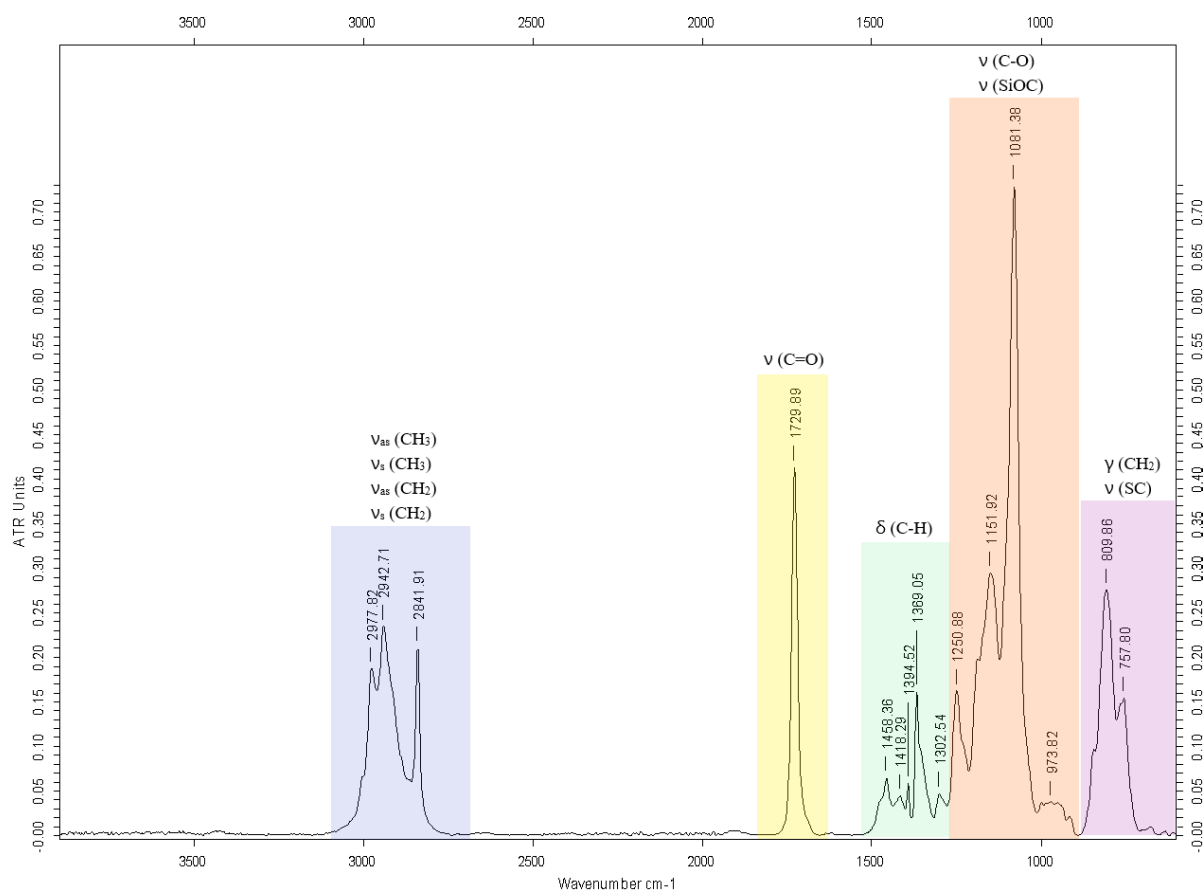

Figure 20. FT-IR NMR spectrum of 3e.

3f

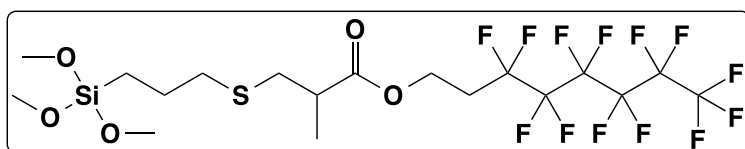

### Product characterization

**<sup>1</sup>H NMR** (400 MHz, CDCl<sub>3</sub>) δ 4.39 (t, *J*=6.4 Hz, 2H, C(O)OCH<sub>2</sub>); 3.55 (s, 9H, Si(OCH<sub>3</sub>)<sub>3</sub>); 2.79 (dd, *J*=12.7, 7.3 Hz, 1H), 2.67 (sext, *J*=6.9 Hz, 1H), 2.58-2.41 (m, 5H) (CH<sub>2</sub>SCH<sub>2</sub>CH, CH<sub>2</sub>CF<sub>2</sub>); 1.67 (m, 2H, (SiCH<sub>2</sub>CH<sub>2</sub>)); 1.23 (d, *J*=6.9 Hz, 3H, CH<sub>3</sub>); 0.72 (m, 2H, SiCH<sub>2</sub>) ppm. **<sup>13</sup>C NMR** (101 MHz, CDCl<sub>3</sub>) δ 174.53 (C=O); 119.85-108.09 (CF<sub>2</sub>, CF<sub>3</sub>); 56.24 (C(O)OCH<sub>2</sub>); 50.29 (Si(OCH<sub>3</sub>)<sub>3</sub>); 39.98, 35.28, 34.94, 30.34, (CH<sub>2</sub>SCH<sub>2</sub>CH, CH<sub>2</sub>CF<sub>2</sub>); 22.76 (SiCH<sub>2</sub>CH<sub>2</sub>); 16.46 (CH<sub>3</sub>); 8.32 (SiCH<sub>2</sub>) ppm. **<sup>29</sup>Si NMR** (79 MHz, CDCl<sub>3</sub>) δ -42.54 (Si(OCH<sub>3</sub>)<sub>3</sub>) ppm.



# NMR spectra

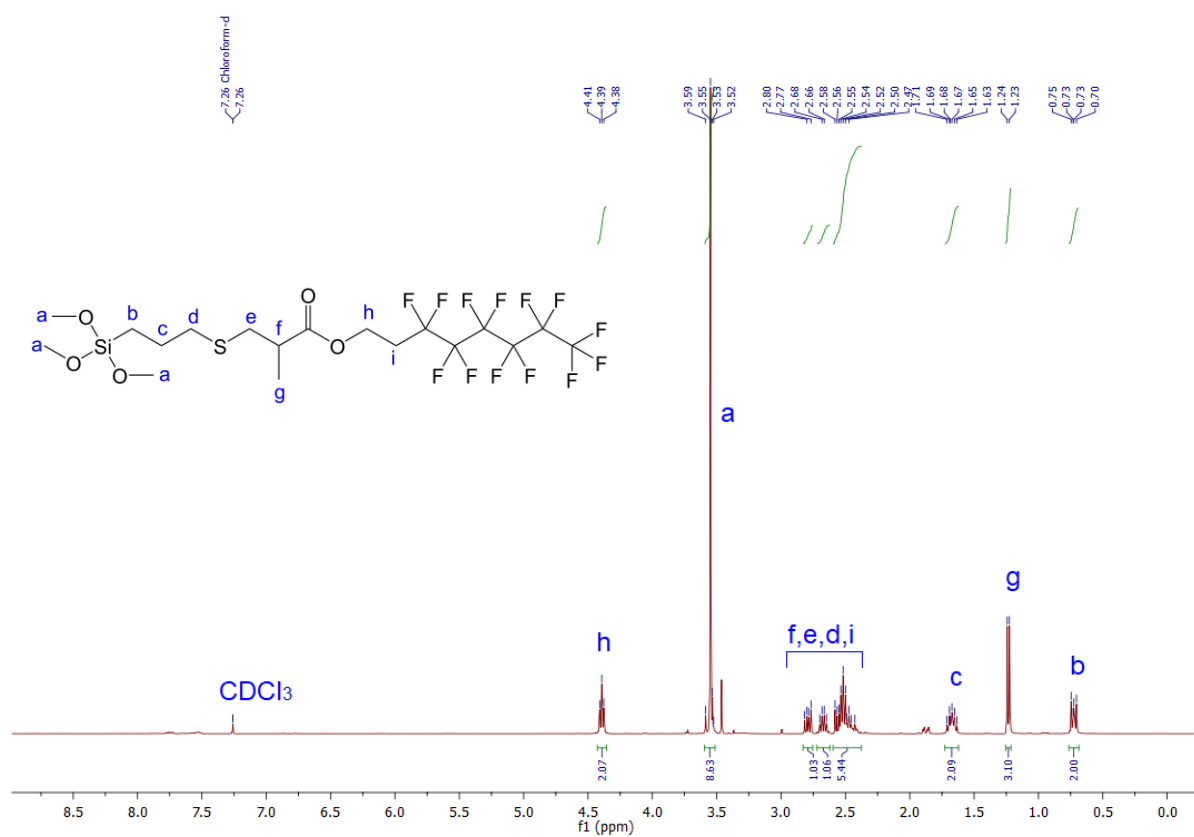

Figure 21. <sup>1</sup>H NMR spectrum of 3f.

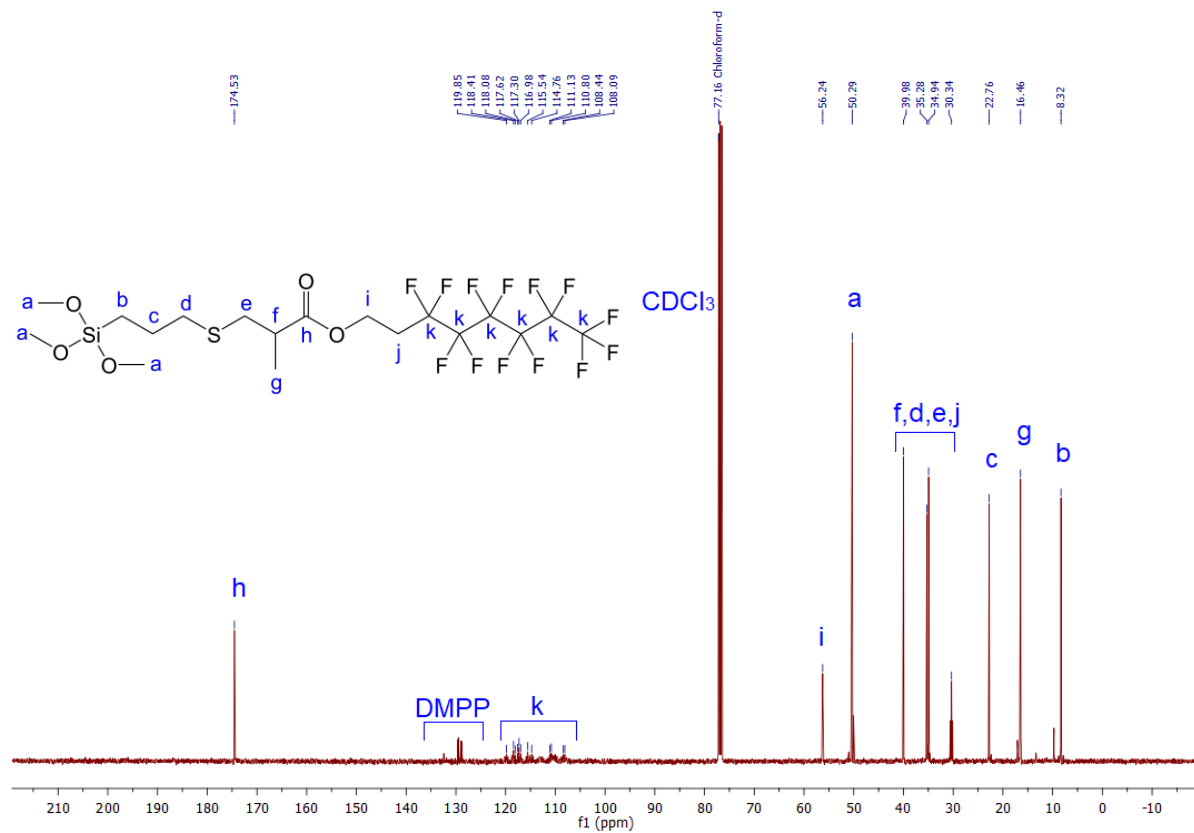

Figure 22. <sup>13</sup>C NMR spectrum of 3f.

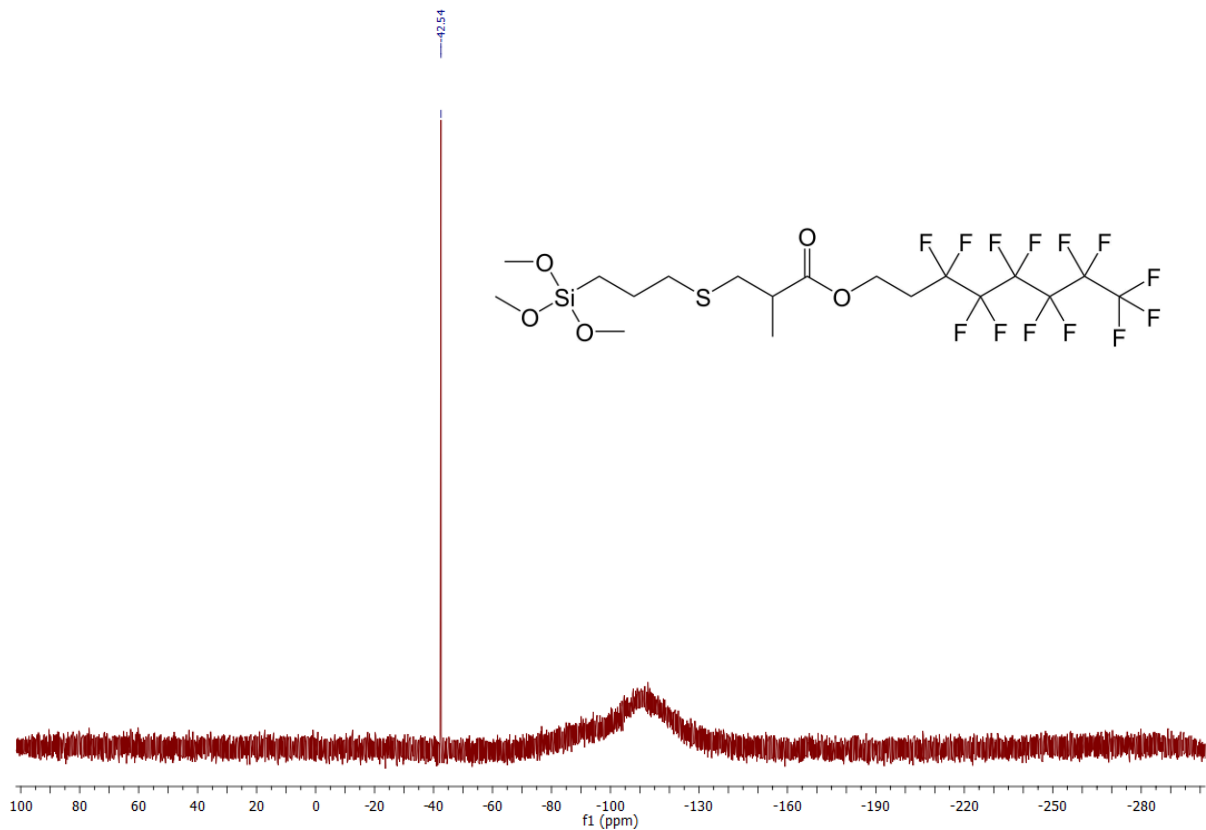

Figure 23.  $^{29}\text{Si}$  NMR spectrum of 3f.

### FT-IR spectrum

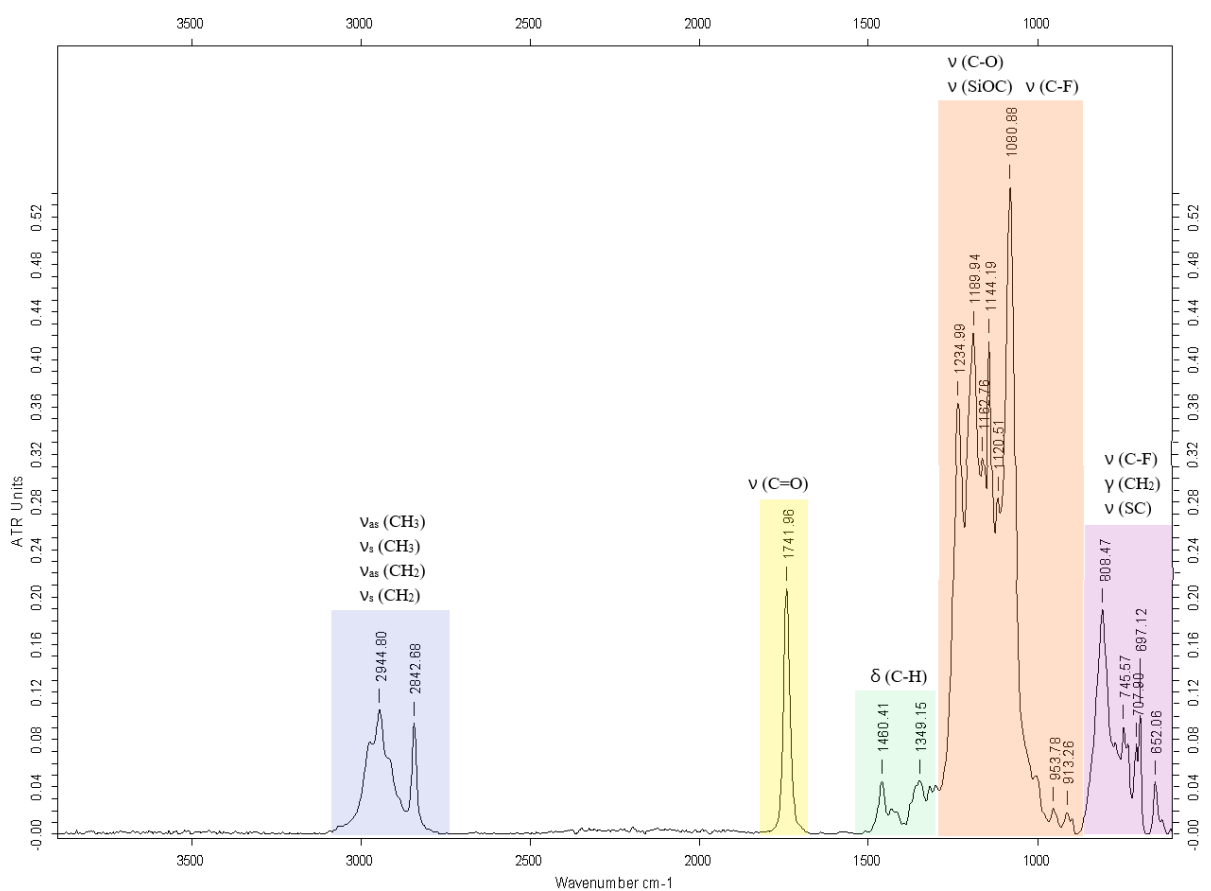

Figure 24. FT-IR NMR spectrum of 3f.

**3g**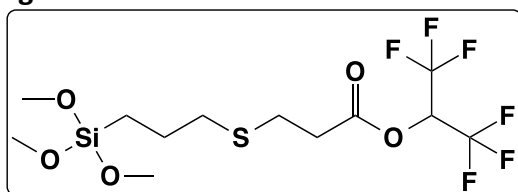

Product characterization

$^1\text{H NMR}$  (400 MHz,  $\text{CDCl}_3$ )  $\delta$  5.76 (hept,  $J=6.1$  Hz, 1H,  $\text{CH}(\text{CF}_3)_2$ ); 3.55 (s, 9H,  $\text{Si}(\text{OCH}_3)_3$ ); 2.80 (s, 4H), 2.55 (m, 2H) ( $\text{CH}_2\text{SCH}_2\text{CH}_2$ ); 1.69 (m, 2H,  $\text{SiCH}_2\text{CH}_2$ ); 0.73 (m, 2H,  $\text{SiCH}_2$ ) ppm.  $^{13}\text{C NMR}$  (101 MHz,  $\text{CDCl}_3$ )  $\delta$  168.90 (C=O); 124.68-116.25 ( $\text{CF}_3$ ); 66.68 ( $\text{CH}(\text{CF}_3)_2$ ); 50.85 ( $\text{Si}(\text{OCH}_3)_3$ ); 35.05, 34.23 ( $\text{CH}_2\text{SCH}_2$ ); 26.30 ( $\text{CH}_2\text{SCH}_2\text{CH}_2$ ); 22.99 ( $\text{SiCH}_2\text{CH}_2$ ); 8.56 ( $\text{SiCH}_2$ ) ppm.  $^{29}\text{Si NMR}$  (79 MHz,  $\text{CDCl}_3$ )  $\delta$  -42.62 ( $\text{Si}(\text{OCH}_3)_3$ ) ppm.

NMR spectra

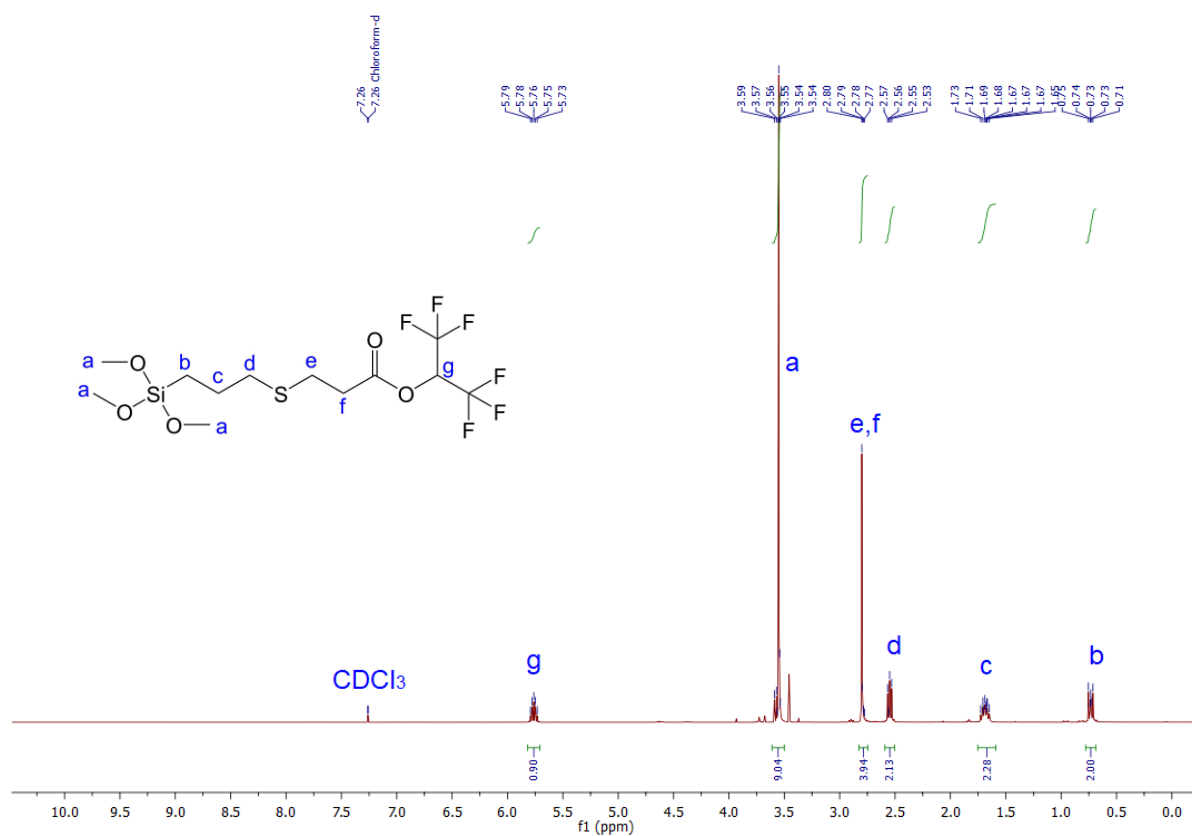Figure 25.  $^1\text{H NMR}$  spectrum of 3g.

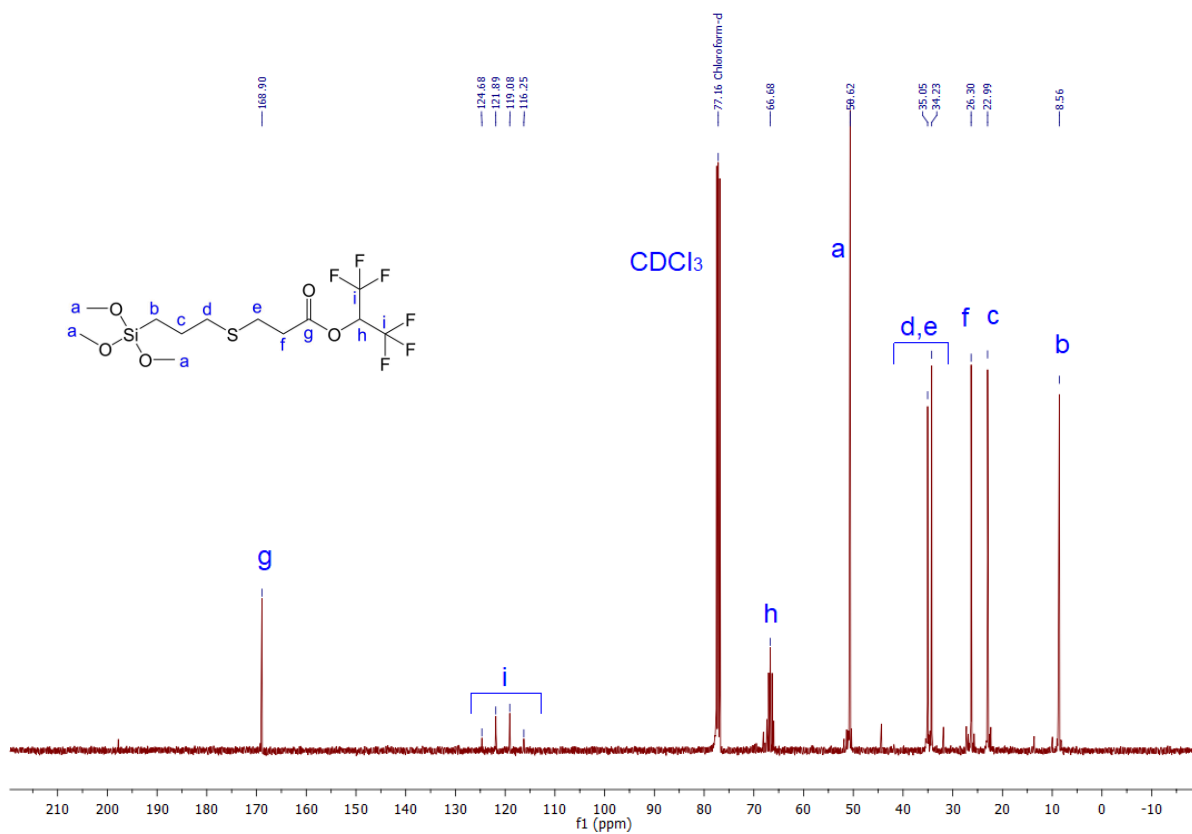

Figure 26. <sup>13</sup>C NMR spectrum of 3g.

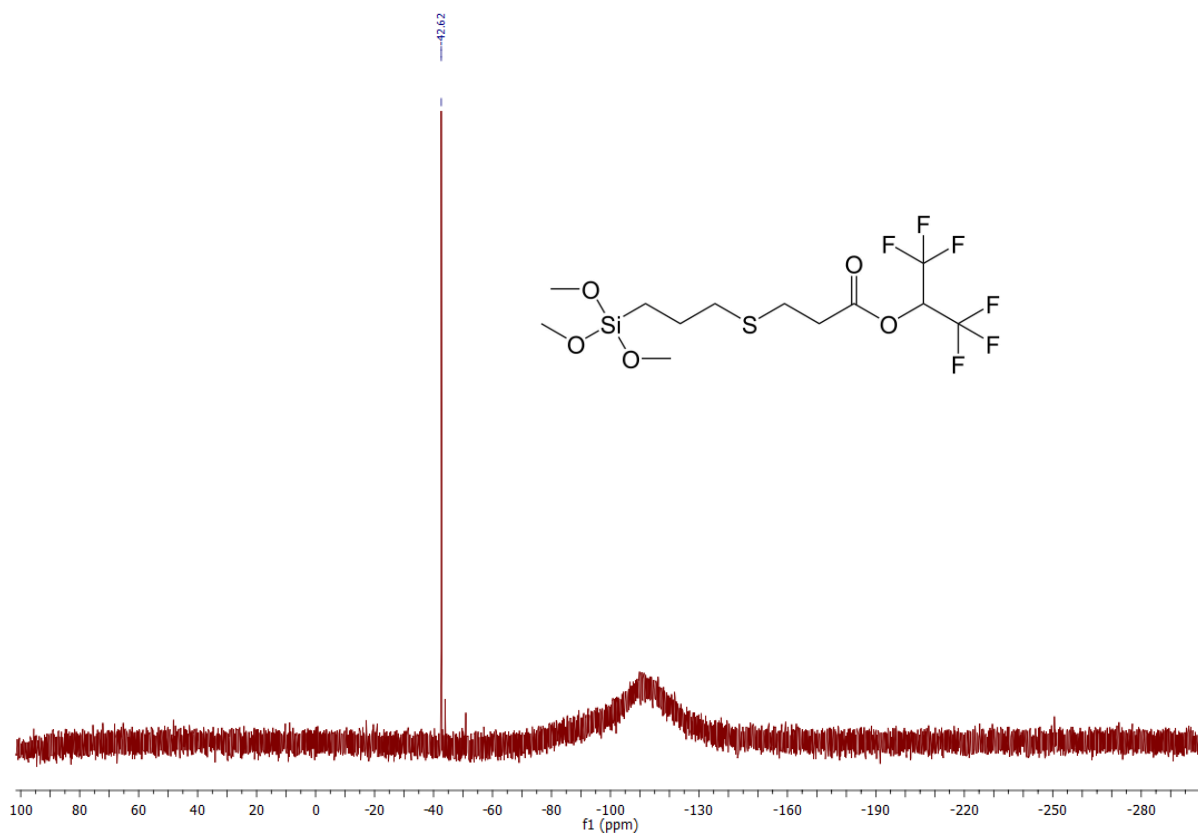

Figure 27. <sup>29</sup>Si NMR spectrum of 3g.

## FT-IR spectrum

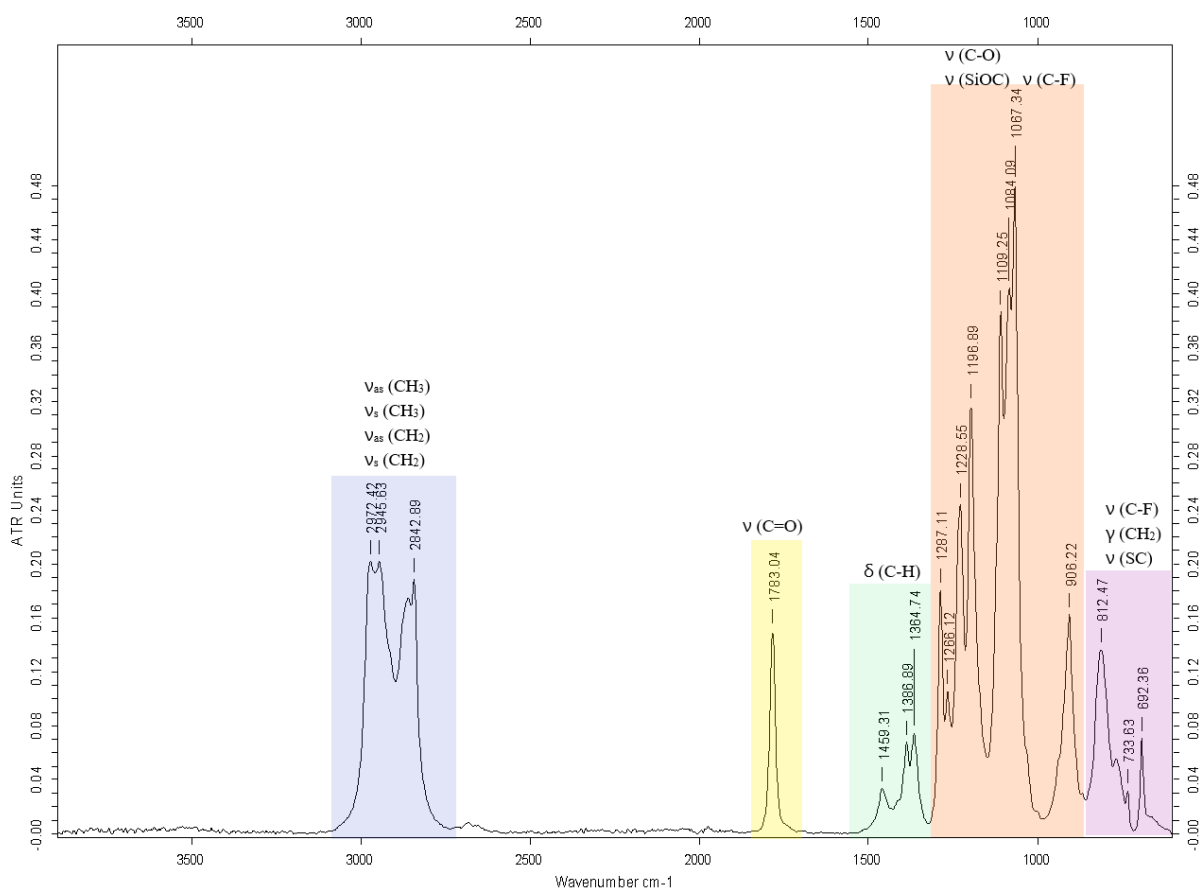

Figure 28. FT-IR spectrum of 3g.

## 3h

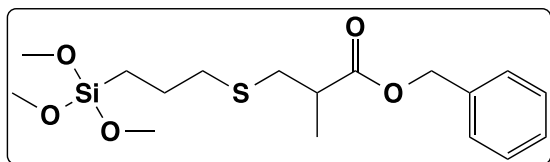

### Product characterization

**<sup>1</sup>H NMR** (400 MHz, CDCl<sub>3</sub>) δ 7.35 – 7.32 (m, 5H, C<sub>6</sub>H<sub>5</sub>); 5.13 (s, 2H, C(O)OCH<sub>2</sub>); 3.55 (s, 9H, Si(OCH<sub>3</sub>)<sub>3</sub>); 2.84 (dd, *J*=12.8, 7.1 Hz, 1H), 2.71 (sext, *J*=6.9 Hz, 1H), 2.57 (dd, *J*=12.8, 6.8 Hz, 1H), 2.51 (m, 2H) (CH<sub>2</sub>SCH<sub>2</sub>CH); 1.67 (m, 2H, SiCH<sub>2</sub>CH<sub>2</sub>); 1.26 (d, *J*=6.9 Hz, 3H, CH<sub>3</sub>); 0.72 (m, 2H, SiCH<sub>2</sub>) ppm. **<sup>13</sup>C NMR** (101 MHz, CDCl<sub>3</sub>) δ 175.15 (C=O); 136.11, 128.67-128.23 (C<sub>6</sub>H<sub>5</sub>); 66.51 (C(O)OCH<sub>2</sub>); 50.83 (Si(OCH<sub>3</sub>)<sub>3</sub>); 40.48 (CH<sub>2</sub>SCH<sub>2</sub>CH); 35.71, 35.66 (CH<sub>2</sub>SCH<sub>2</sub>); 23.10 (SiCH<sub>2</sub>CH<sub>2</sub>); 16.94 (CH<sub>3</sub>); 8.66 (SiCH<sub>2</sub>) ppm. **<sup>29</sup>Si NMR** (79 MHz, CDCl<sub>3</sub>) δ -42.47 (Si(OCH<sub>3</sub>)<sub>3</sub>) ppm.

# NMR spectra

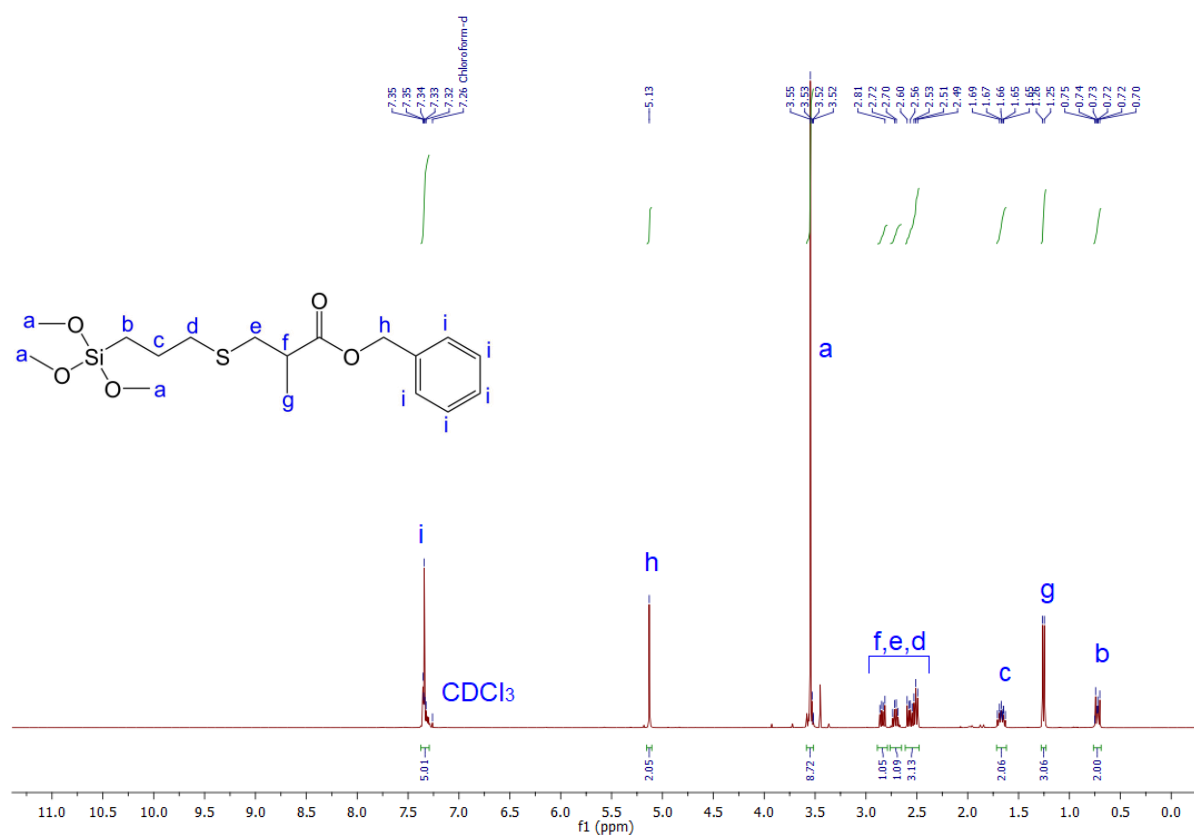

**Figure 29.**  $^1\text{H}$  NMR spectrum of 3h.

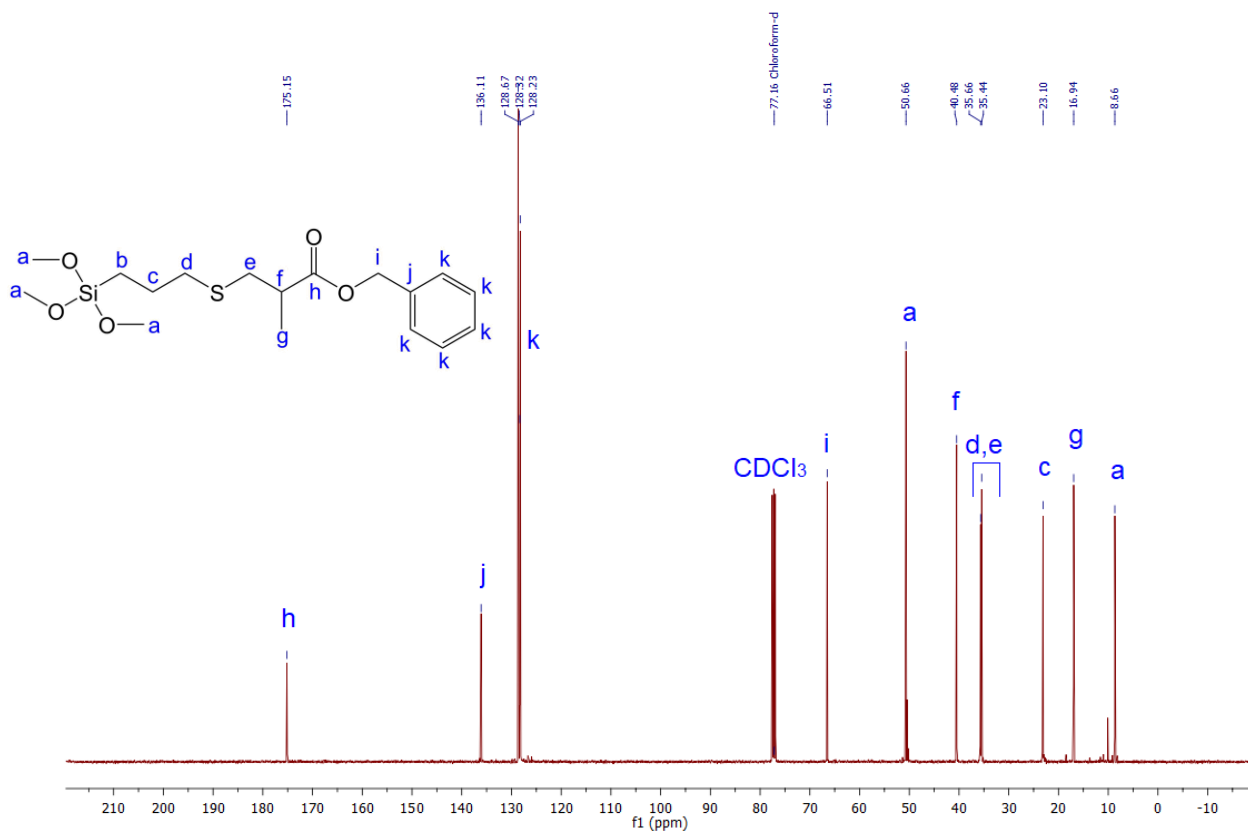

**Figure 30.**  $^{13}\text{C}$  NMR spectrum of 3h.

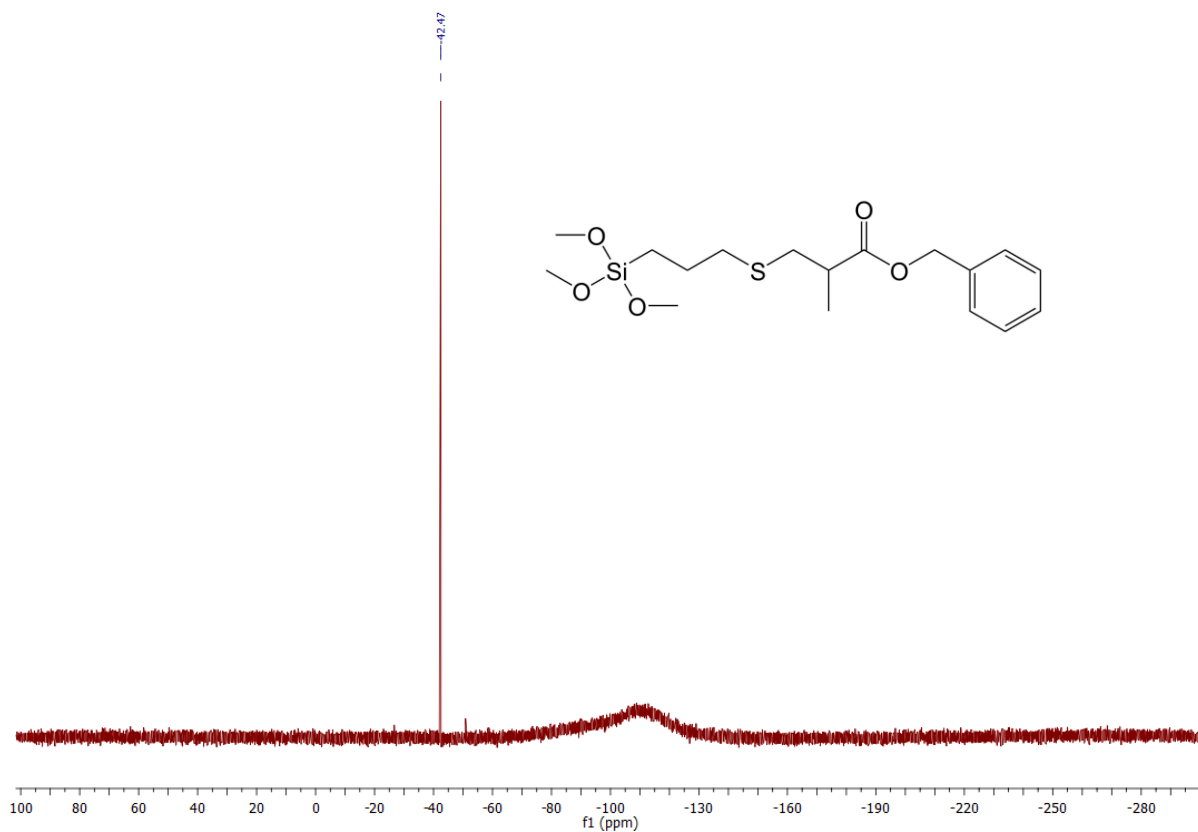

Figure 31.  $^{29}\text{Si}$  NMR spectrum of 3h.

FT-IR spectrum

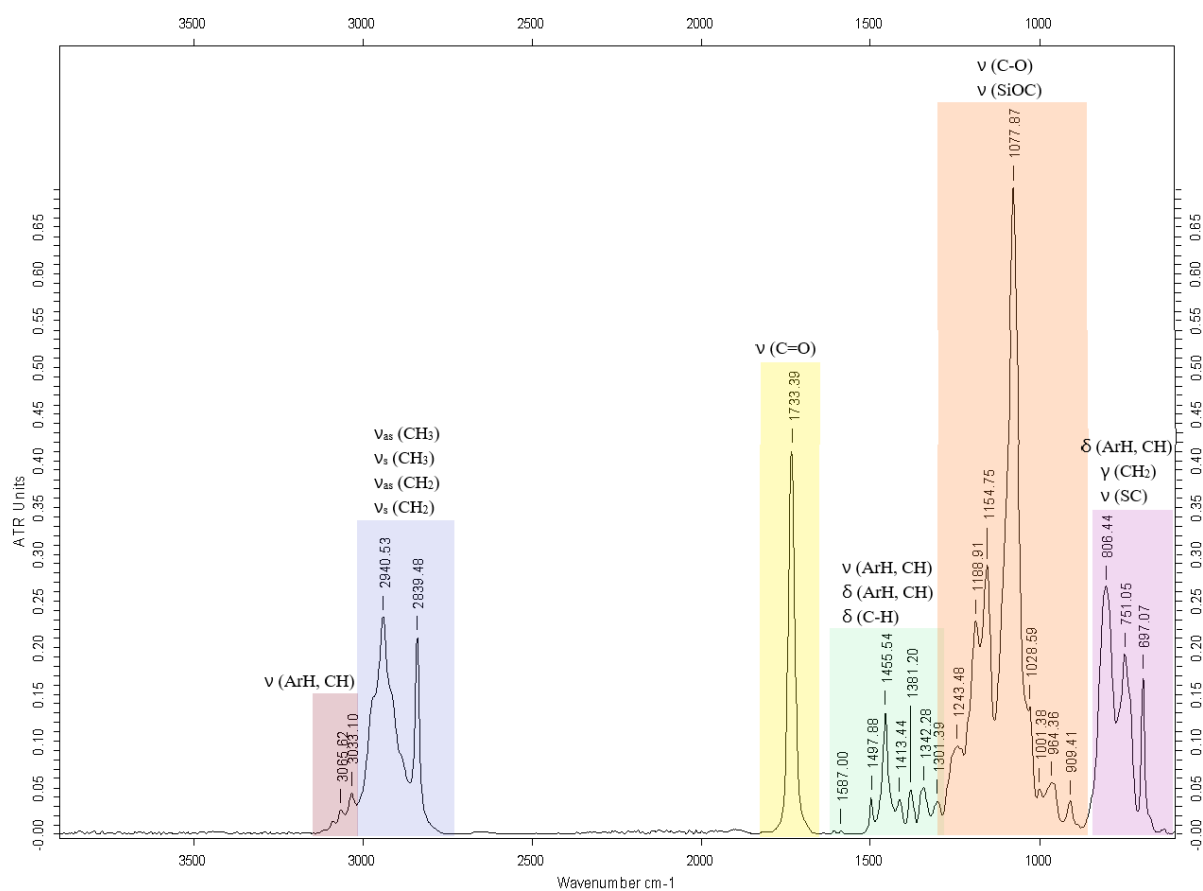

Figure 32. FT-IR spectrum of 3h.

**3i**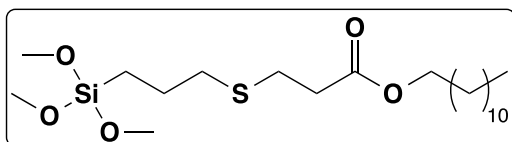

### Product characterization

**<sup>1</sup>H NMR** (400 MHz, CDCl<sub>3</sub>) δ 4.06 (t, *J*=6.7 Hz, 2H, C(O)CH<sub>2</sub>); 3.55 (s, 9H, Si(OCH<sub>3</sub>)<sub>3</sub>); 2.75 (t, *J*=7.4 Hz, 2H), 2.55 (dt, *J*=14.9, 7.4 Hz, 4H) (CH<sub>2</sub>SCH<sub>2</sub>CH<sub>2</sub>); 1.68 (m, 2H, SiCH<sub>2</sub>CH<sub>2</sub>); 1.60 (m, 2H, C(O)CH<sub>2</sub>CH<sub>2</sub>); 1.33 – 1.24 (m, 18H, CH<sub>2</sub>); 0.86 (t, *J*=6.7 Hz, 3H, CH<sub>3</sub>); 0.73 (m, 2H, CH<sub>2</sub>) ppm. **<sup>13</sup>C NMR** (101 MHz, CDCl<sub>3</sub>) δ 172.17 (C=O); 64.96 (C(O)OCH<sub>2</sub>); 50.63 Si(OCH<sub>3</sub>)<sub>3</sub>; 35.08, 32.02, 29.74, 29.73, 29.68, 29.62, 29.45, 29.35, 28.70, 26.94, 26.01, 23.02, 22.79 (CH<sub>2</sub>); 14.21 (CH<sub>3</sub>), 8.64 (SiCH<sub>2</sub>) ppm. **<sup>29</sup>Si NMR** (79 MHz, CDCl<sub>3</sub>) δ -42.49 (Si(OCH<sub>3</sub>)<sub>3</sub>) ppm

### NMR spectra

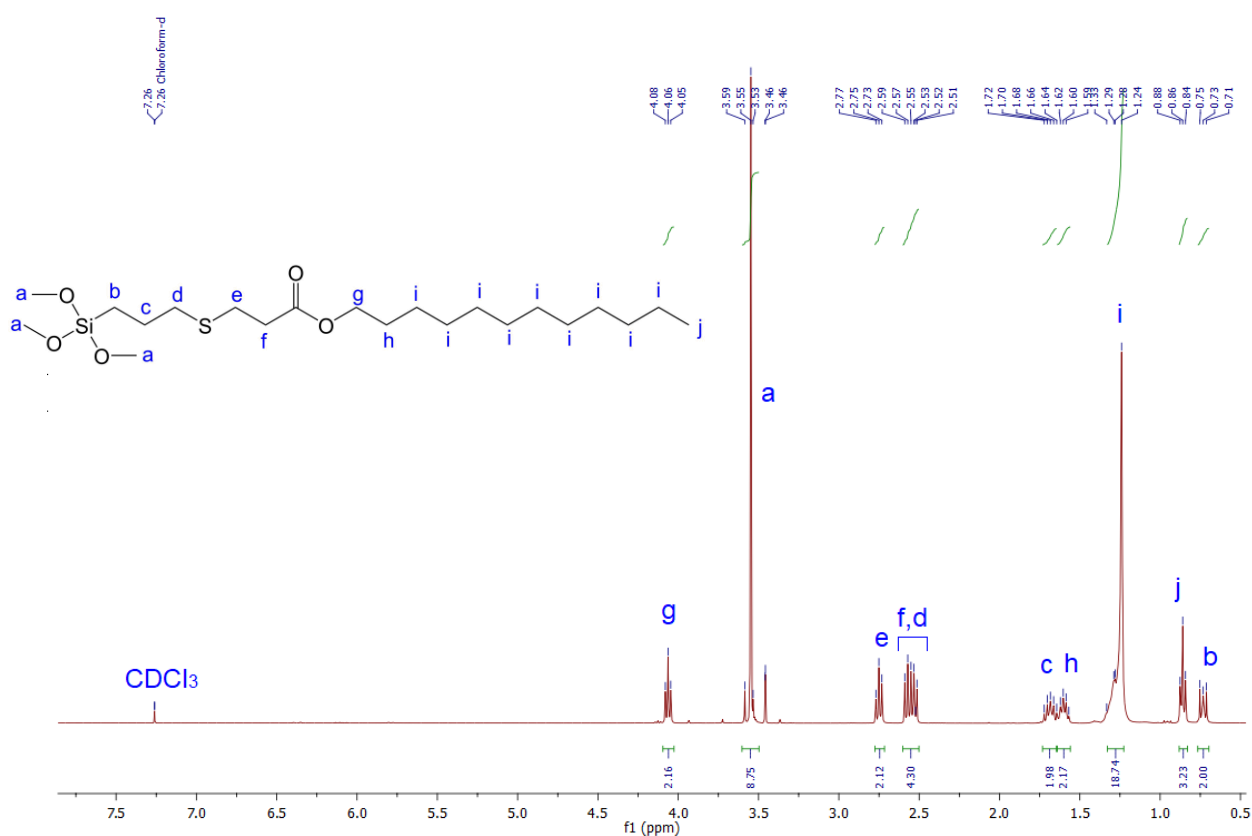

**Figure 33.** <sup>1</sup>H NMR spectrum of 3i.



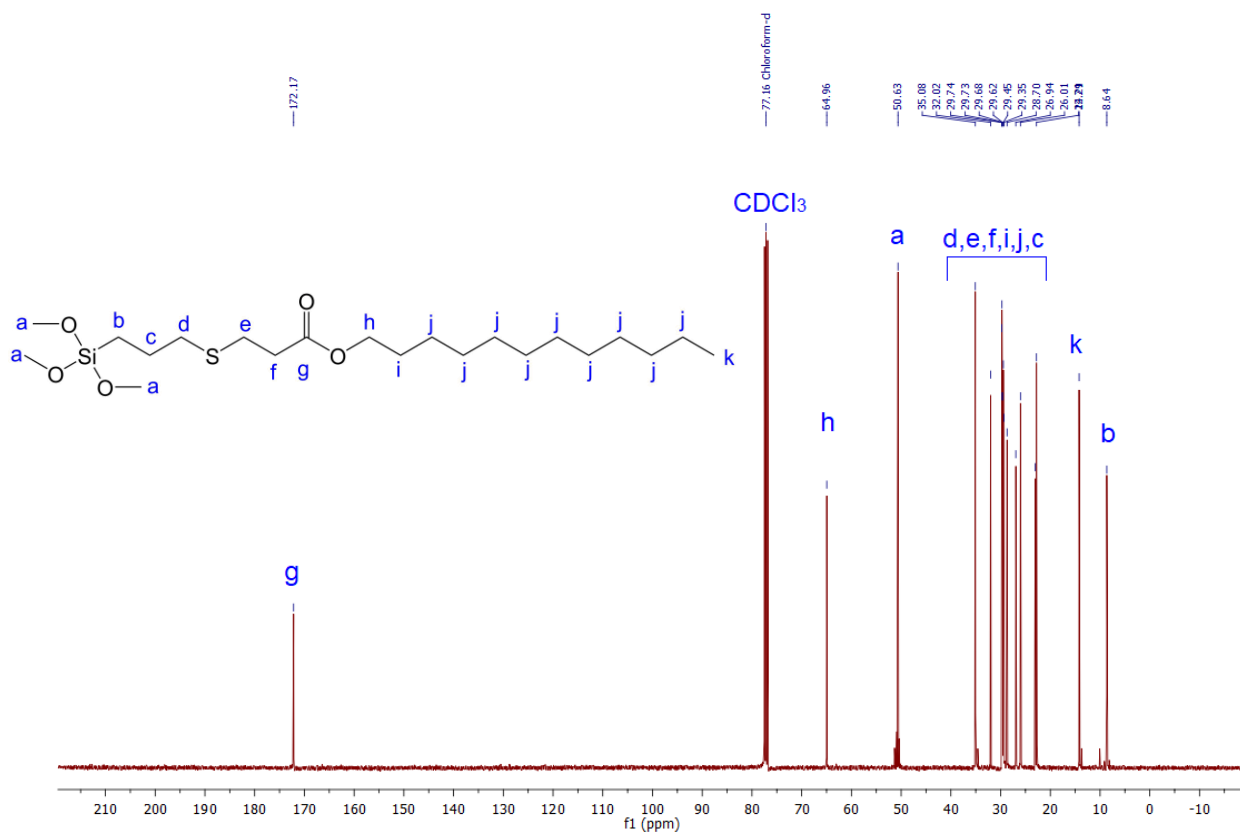

Figure 34. <sup>13</sup>C NMR spectrum of 3i.

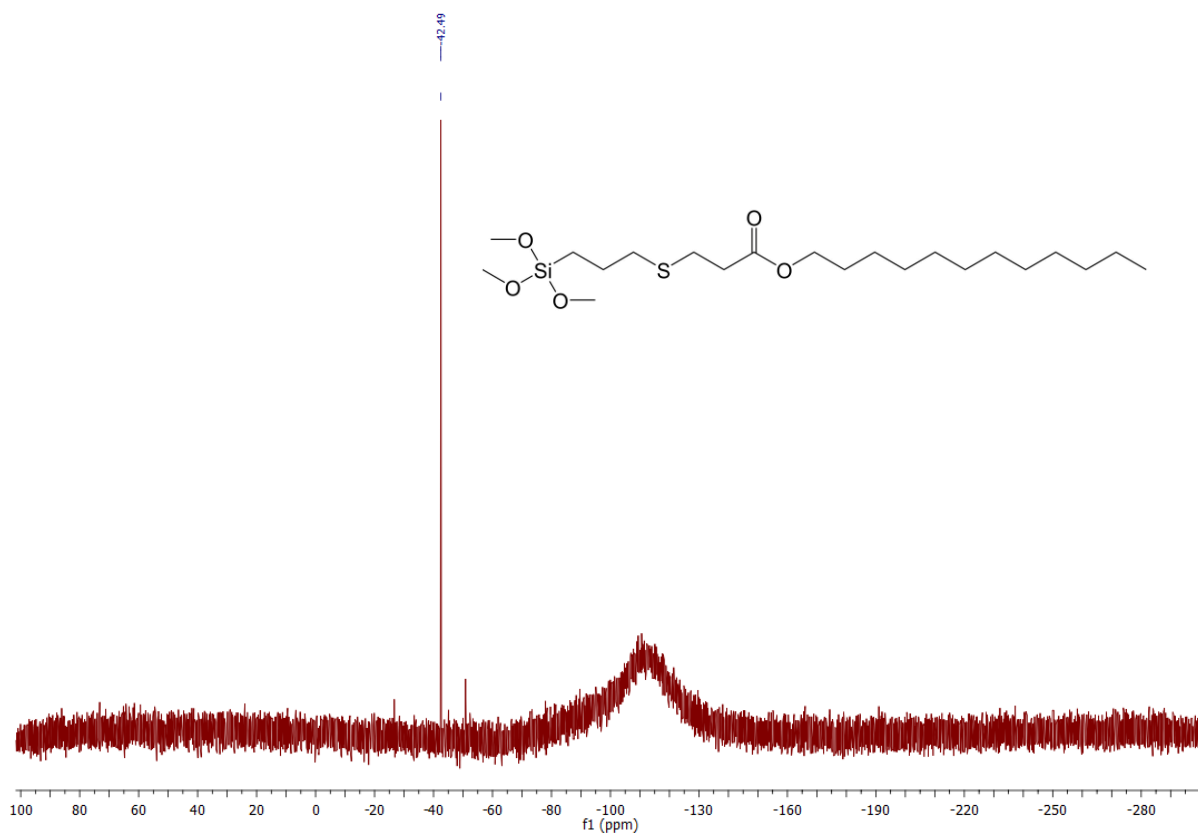

Figure 35. <sup>29</sup>Si NMR spectrum of 3i.

## FT-IR spectrum

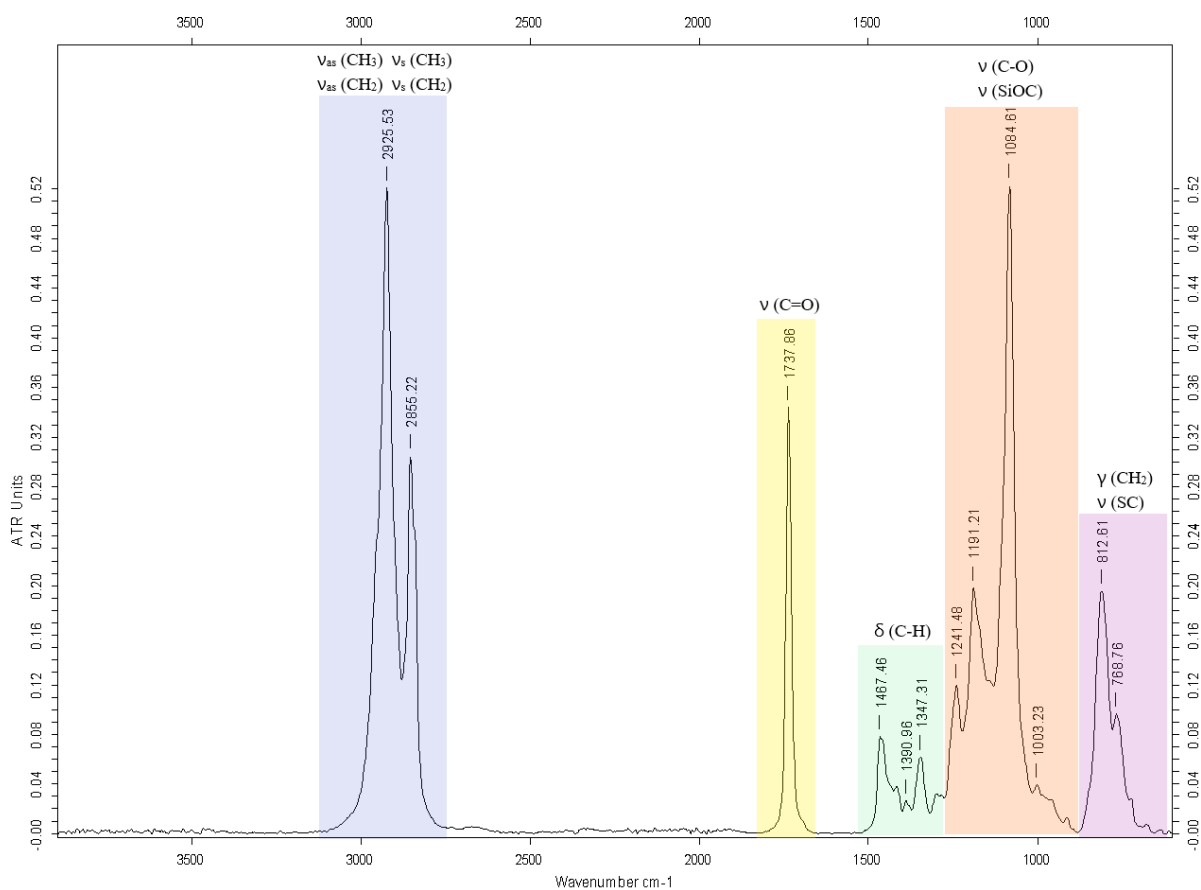

Figure 36. FT-IR spectrum of 3i.

3j

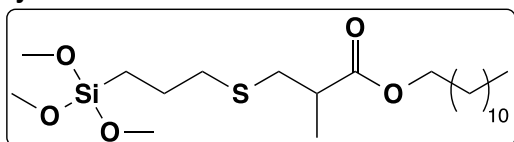

### Product characterization

**<sup>1</sup>H NMR** (400 MHz, CDCl<sub>3</sub>)  $\delta$  4.06 (tt,  $J=6.7, 1.3$  Hz, 2H, C(O)OCH<sub>2</sub>); 3.54 (m, 9H, (Si(OCH<sub>3</sub>)<sub>3</sub>); 2.80 (ddt,  $J=12.7, 7.0, 1.4$  Hz, 1H), 2.62 (m, 1H), 2.52 (m, 3H) (CH<sub>2</sub>SCH<sub>2</sub>CH); 1.74 – 1.64 (m, 2H, SiCH<sub>2</sub>CH<sub>2</sub>); 1.64 – 1.55 (m, 2H, C(O)OCH<sub>2</sub>CH<sub>2</sub>); 1.32 – 1.21 (m, 21H, CH<sub>2</sub>, CH<sub>3</sub>); 0.85 (m, 3H, CHCH<sub>3</sub>); 0.72 (m, 2H, SiCH<sub>2</sub>) ppm.

**<sup>13</sup>C NMR** (101 MHz, CDCl<sub>3</sub>)  $\delta$  175.02 (C=O); 64.50 (C(O)OCH<sub>2</sub>); 50.28 (Si(OCH<sub>3</sub>)<sub>3</sub>); 40.10, 35.28, 35.10, 31.67, 29.40, 29.39, 29.34, 29.28, 29.11, 29.00, 28.38, 25.66, 22.74, 22.45 (CH<sub>2</sub>); 16.62 (CHCH<sub>3</sub>); 13.87 (CH<sub>3</sub>); 8.30 (SiCH<sub>2</sub>) ppm. **<sup>29</sup>Si NMR** (79 MHz, CDCl<sub>3</sub>)  $\delta$  -42.47 (Si(OCH<sub>3</sub>)<sub>3</sub>) ppm.

# NMR spectra

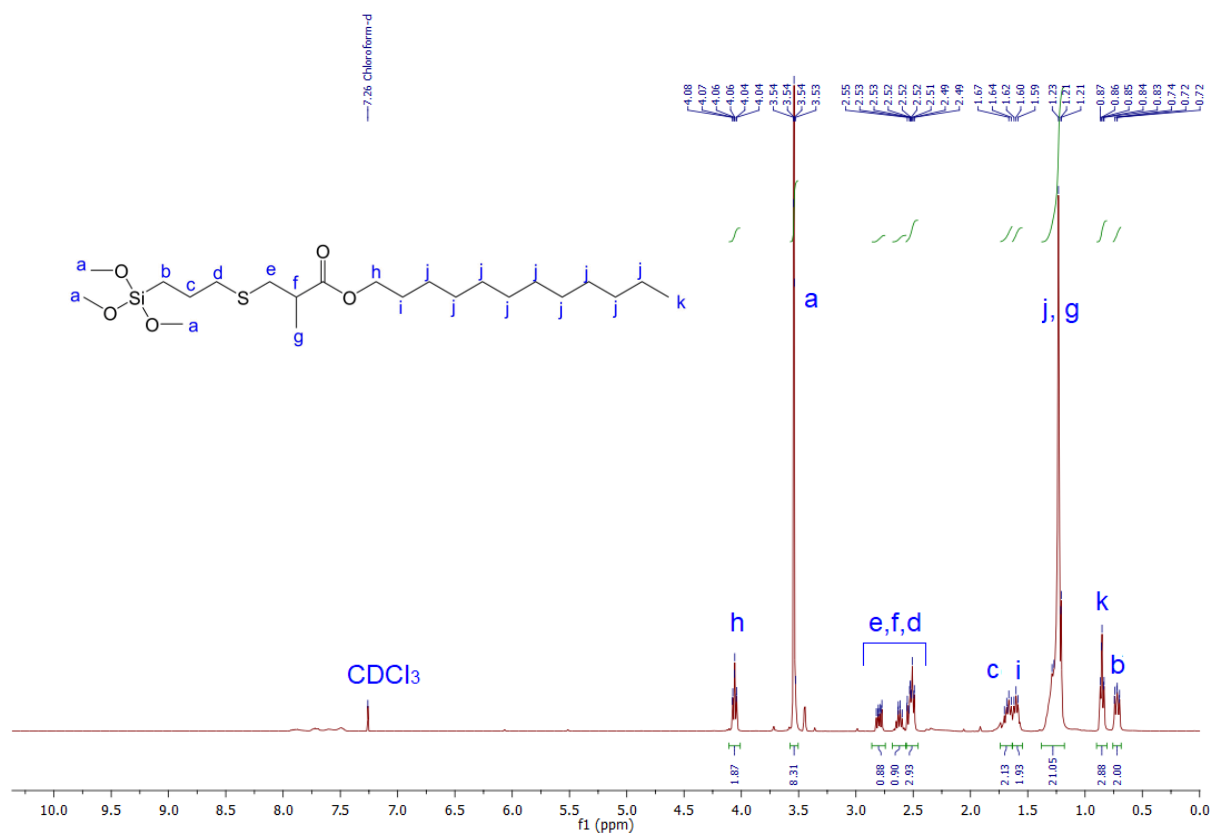

Figure 37. <sup>1</sup>H NMR spectrum of 3j.

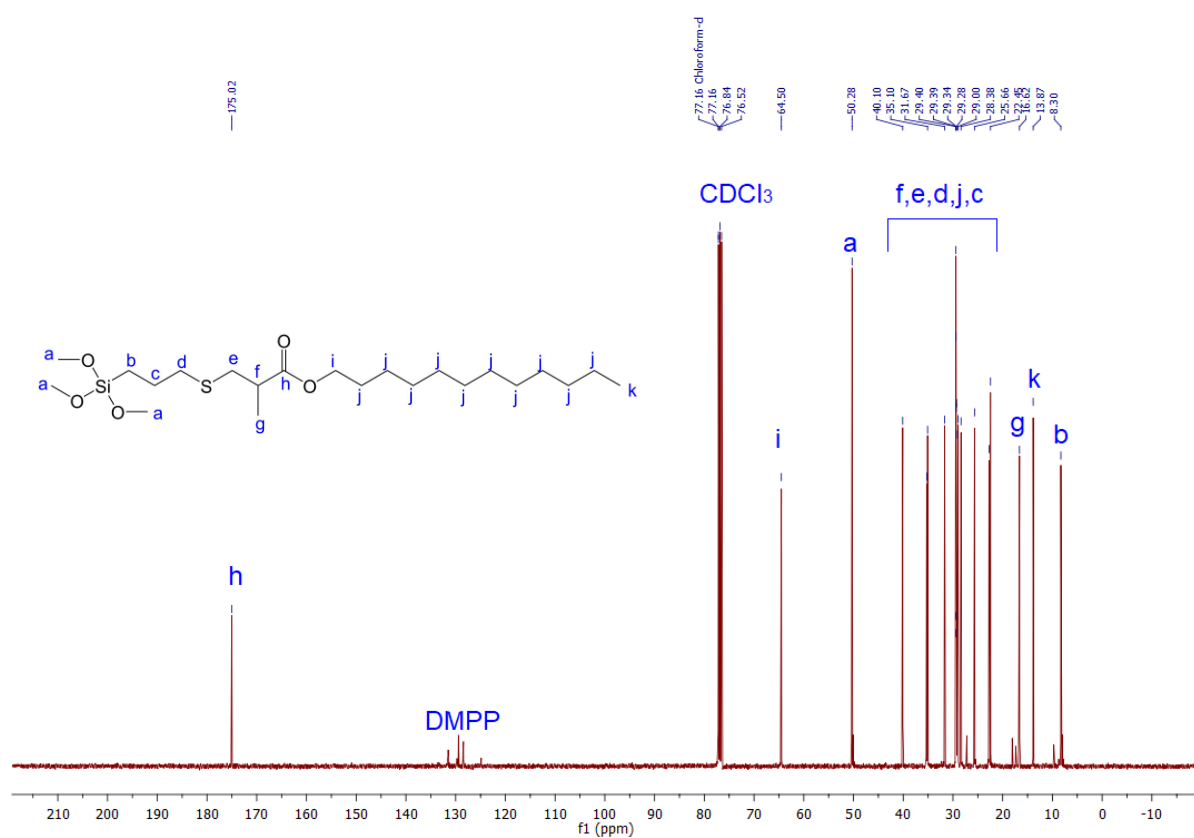

Figure 38. <sup>13</sup>C NMR spectrum of 3j.

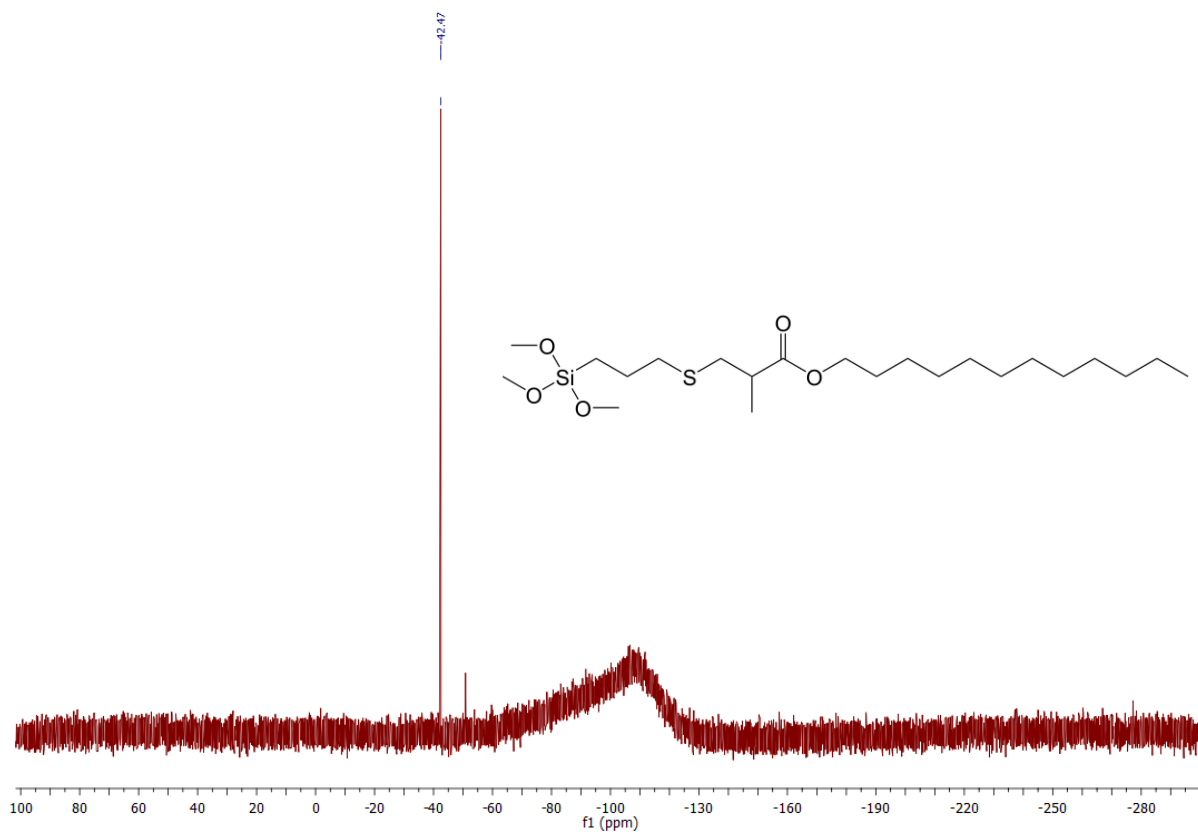

Figure 39.  $^{29}\text{Si}$  NMR spectrum of 3j.

### FT-IR spectrum

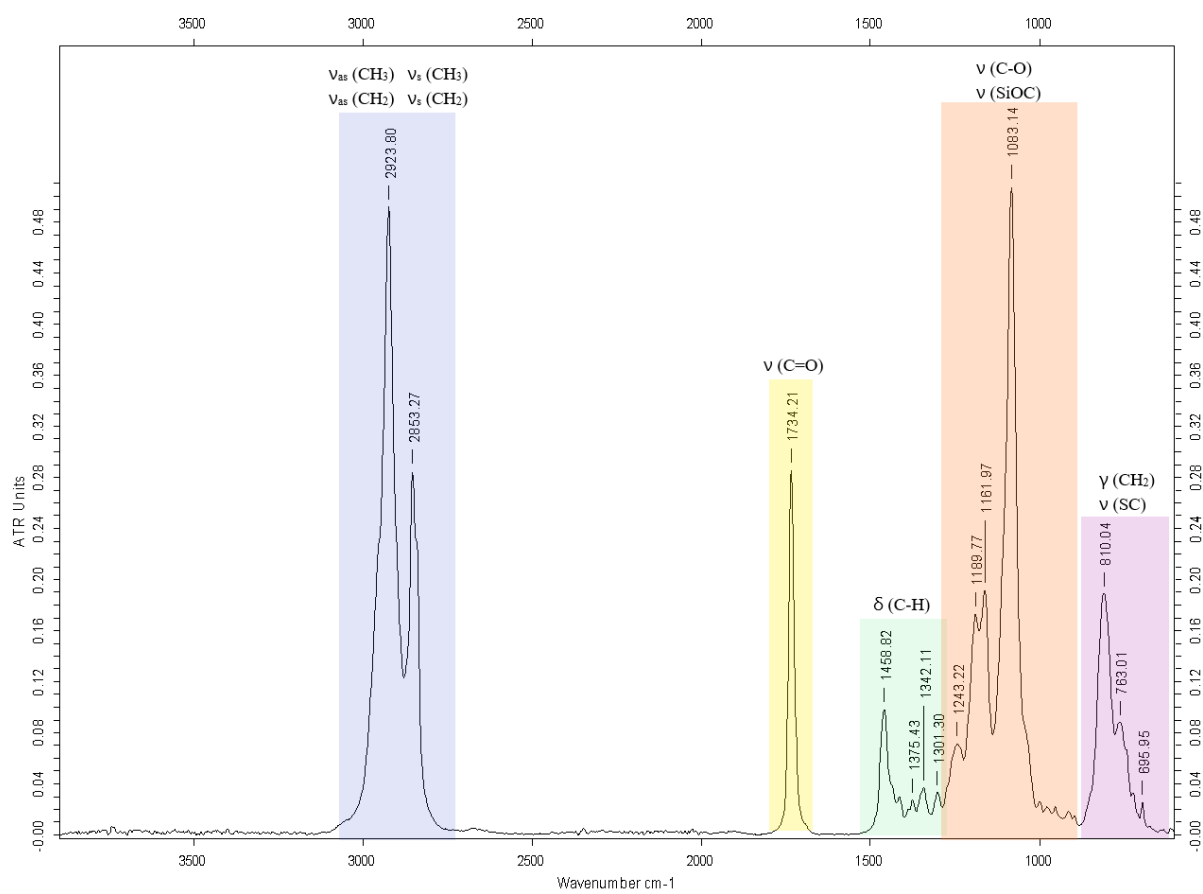

Figure 40. FT-IR spectrum of 3j.

**3k**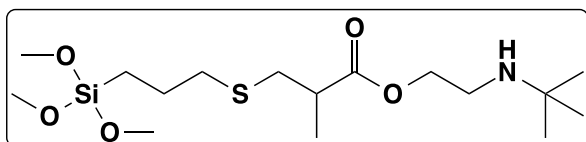

## Product characterization

$^1\text{H NMR}$  (600 MHz,  $\text{CDCl}_3$ )  $\delta$  4.16 (dq,  $J=13.0, 5.4$  Hz, 2H,  $\text{C(O)OCH}_2$ ); 3.51 (s, 9H,  $\text{Si(OCH}_3)_3$ ); 2.78 – 2.74 (m, 3H), 2.63 (sext,  $J=7.0$  Hz, 1H), 2.54-2.47 (m, 3H) ( $\text{CH}_2$ ); 1.63 (m, 2H,  $\text{SiCH}_2\text{CH}_2$ ); 1.20 (d,  $J=7.0$  Hz, 3H,  $\text{CH}_3$ ); 1.06 (s, 9H,  $\text{CH}_3$ ); 0.69 (m, 2H,  $\text{SiCH}_2$ ) ppm.  $^{13}\text{C NMR}$  (151 MHz,  $\text{CDCl}_3$ )  $\delta$  174.87 ( $\text{C=O}$ ); 64.96 ( $\text{C(O)OCH}_2$ ); 50.34 ( $\text{Si(OCH}_3)_3$ ); 41.10 ( $\text{CH}_2\text{NH}$ ); 40.07, 35.36, 35.18 ( $\text{CH}_2\text{SCH}_2$ ); 28.74 ( $(\text{CH}_3)_3$ ); 22.80 ( $\text{SiCH}_2\text{CH}_2$ ); 16.77 ( $\text{CHCH}_3$ ); 8.38 ( $\text{SiCH}_2$ ) ppm.  $^{29}\text{Si NMR}$  (119 MHz,  $\text{CDCl}_3$ )  $\delta$  -42.55 ( $\text{Si(OCH}_3)_3$ ) ppm.

## NMR spectra

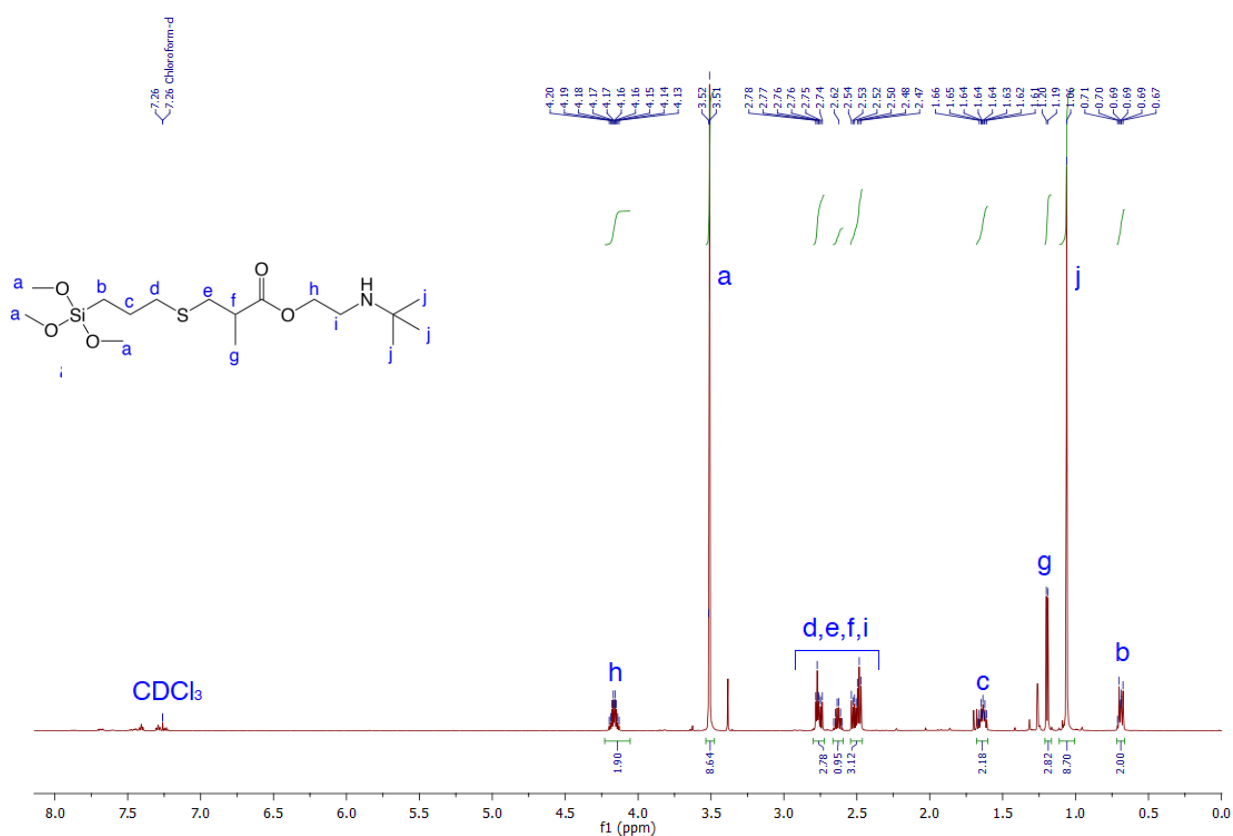

**Figure 41.**  $^1\text{H NMR}$  spectrum of 3k.

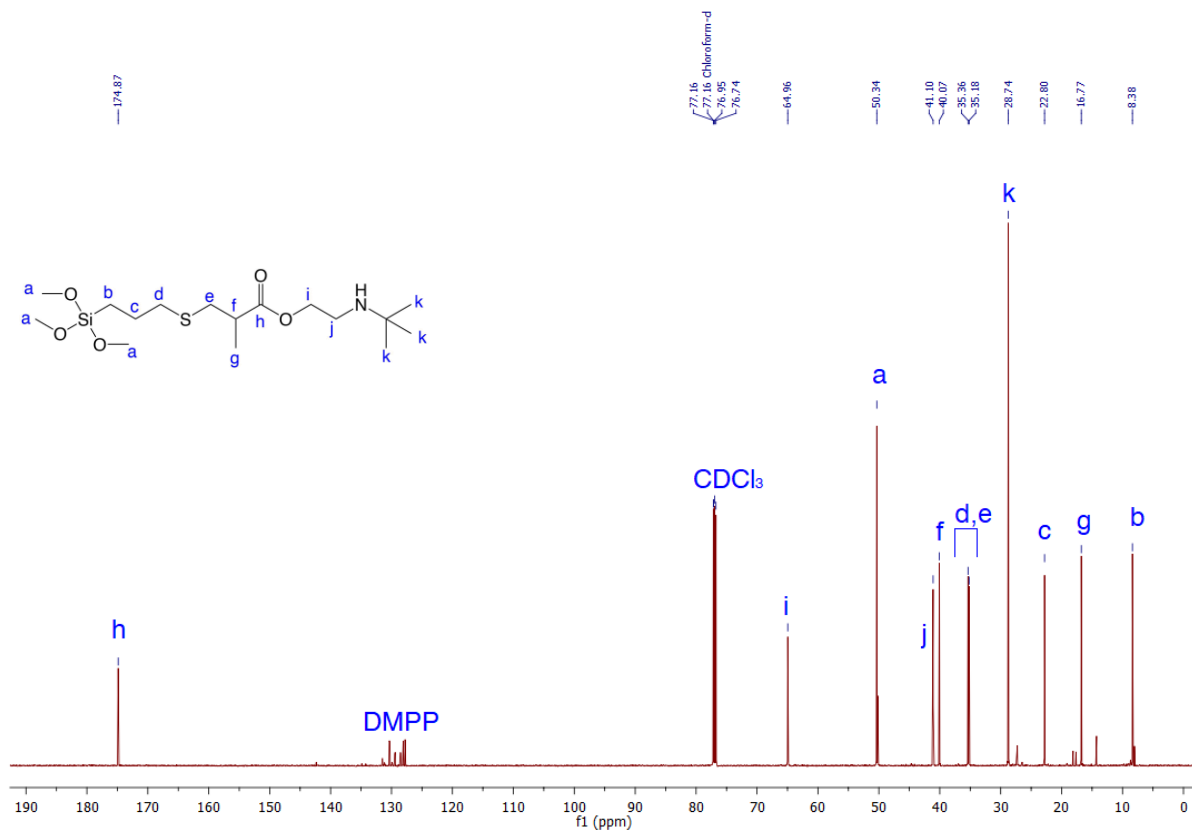

Figure 42.  $^{13}\text{C}$  NMR spectrum of 3k.

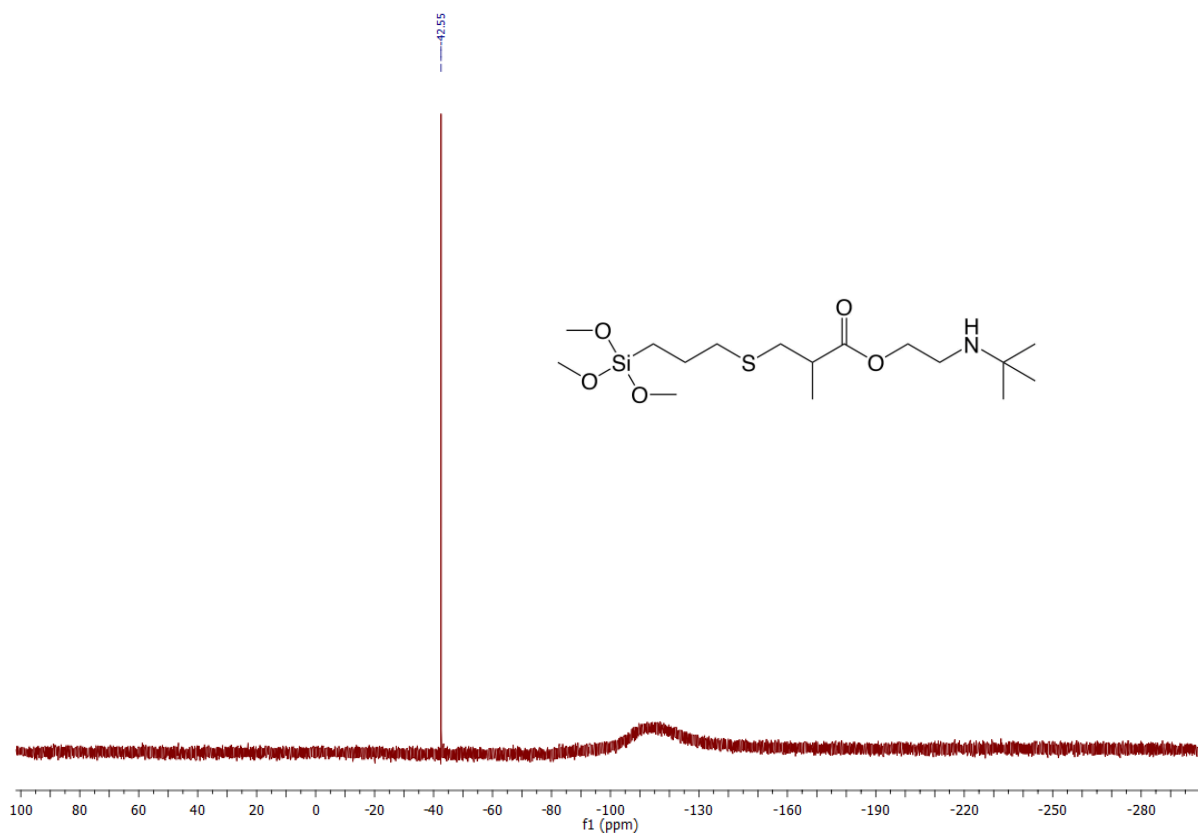

Figure 43.  $^{29}\text{Si}$  NMR spectrum of 3k.

## FT-IR spectrum

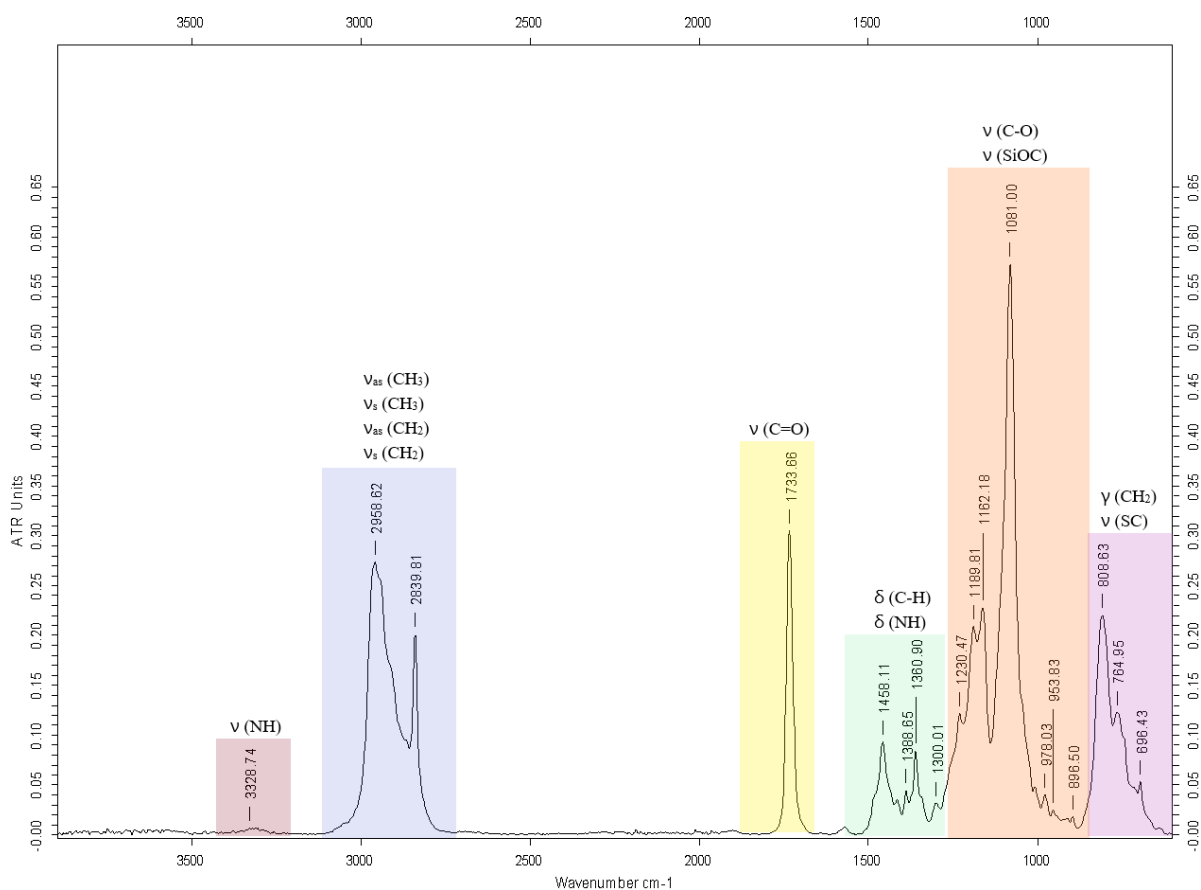

Figure 44. FT-IR NMR spectrum of 3k.

3l

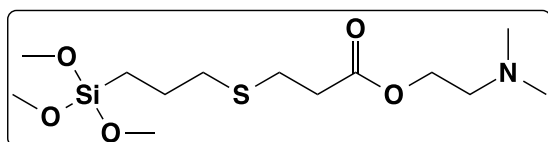

### Product characterization

**<sup>1</sup>H NMR** (400 MHz, CDCl<sub>3</sub>)  $\delta$  4.13 (t,  $J$ =5.7 Hz, 2H, C(O)OCH<sub>2</sub>); 3.48 (s, 9H, Si(OCH<sub>3</sub>)<sub>3</sub>); 2.69 (m, 2H), 2.54 (m, 4H), 2.47 (m, 2H) (CH<sub>2</sub>SCH<sub>2</sub>CH<sub>2</sub>, CH<sub>2</sub>N(CH<sub>3</sub>)<sub>2</sub>); 2.22 (s, 6H, N(CH<sub>3</sub>)<sub>2</sub>); 1.61 (m, 2H, SiCH<sub>2</sub>CH<sub>2</sub>); 0.66 (m, 2H, SiCH<sub>2</sub>) ppm. **<sup>13</sup>C NMR** (101 MHz, CDCl<sub>3</sub>)  $\delta$  172.82 (C=O); 62.04 (C(O)OCH<sub>2</sub>); 57.51 (CH<sub>2</sub>N(CH<sub>3</sub>)<sub>2</sub>); 50.34 (Si(OCH<sub>3</sub>)<sub>3</sub>); 45.41 (N(CH<sub>3</sub>)<sub>2</sub>); 34.78, 34.67 (CH<sub>2</sub>SCH<sub>2</sub>); 26.56 (CH<sub>2</sub>SCH<sub>2</sub>CH<sub>2</sub>); 22.72 (SiCH<sub>2</sub>CH<sub>2</sub>); 8.36 (SiCH<sub>2</sub>) ppm. **<sup>29</sup>Si NMR** (79 MHz, CDCl<sub>3</sub>)  $\delta$  -42.56 (Si(OCH<sub>3</sub>)<sub>3</sub>) ppm.

# NMR spectra

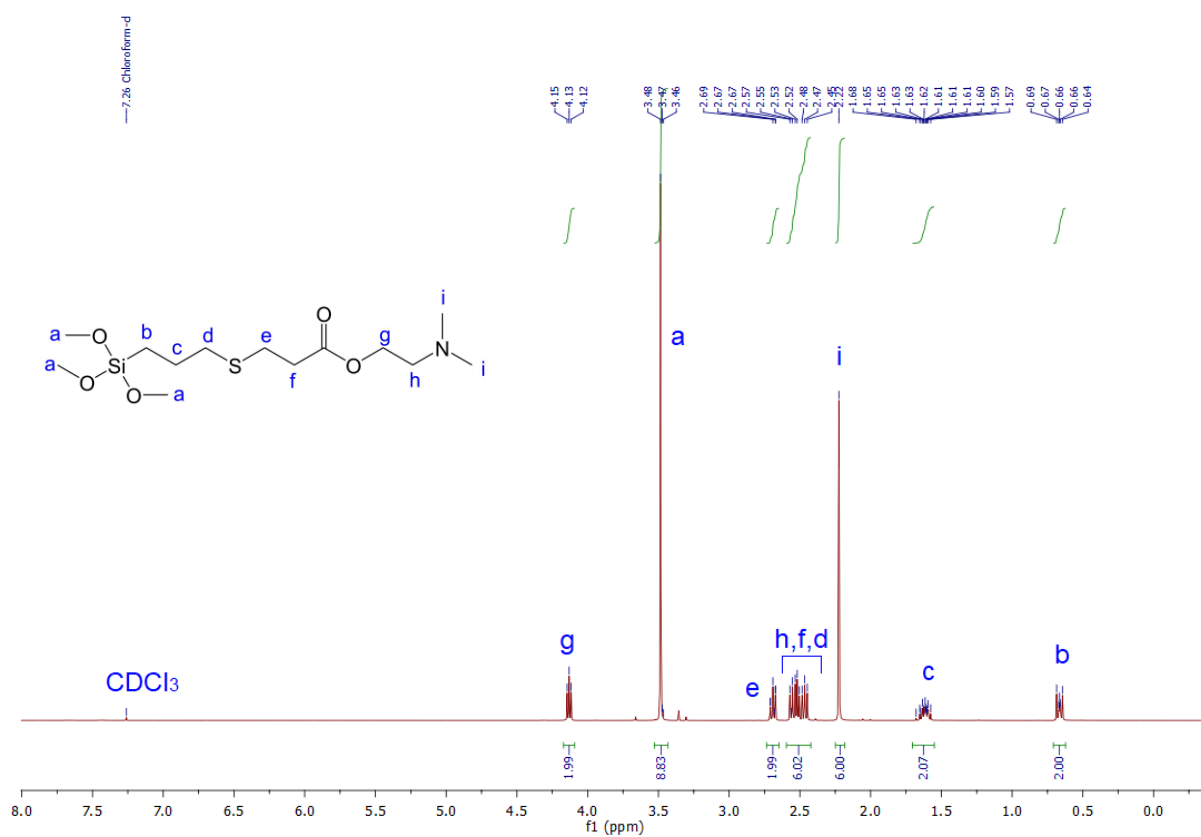

Figure 45. <sup>1</sup>H NMR spectrum of 3l.

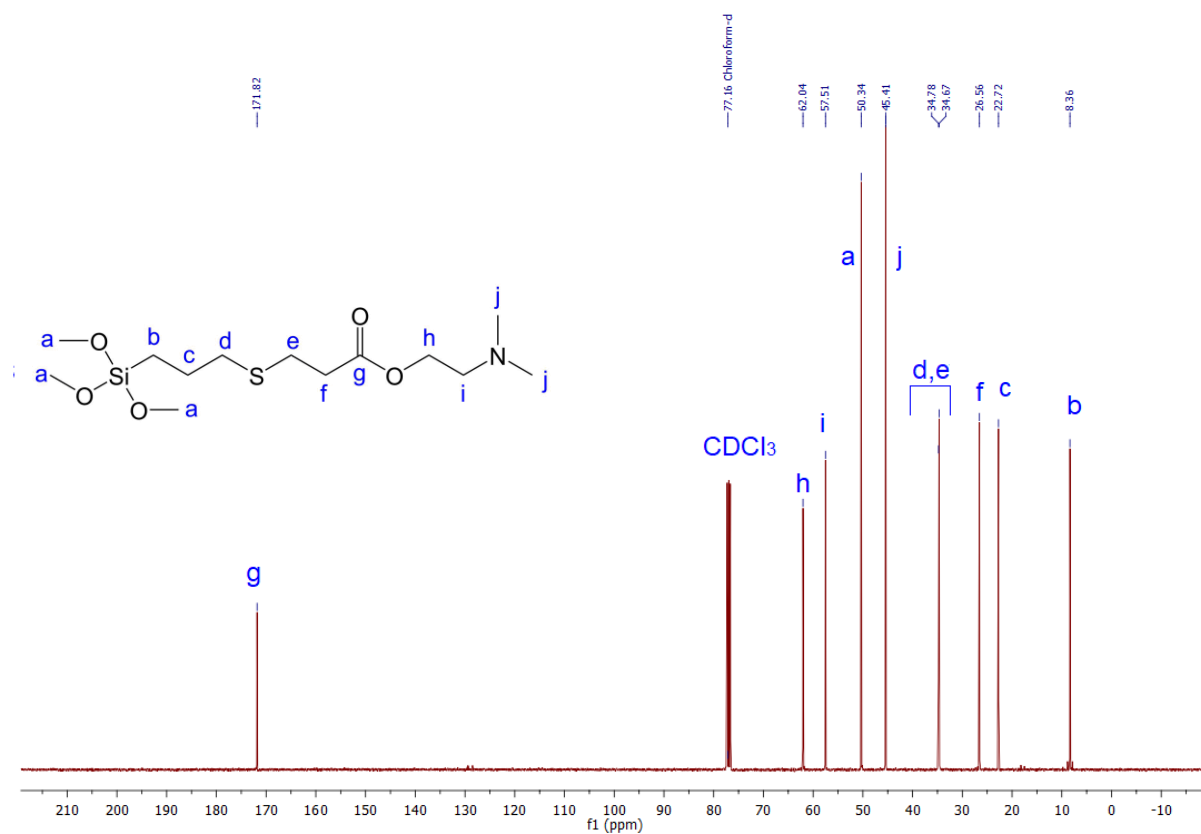

Figure 46. <sup>13</sup>C NMR spectrum of 3l.



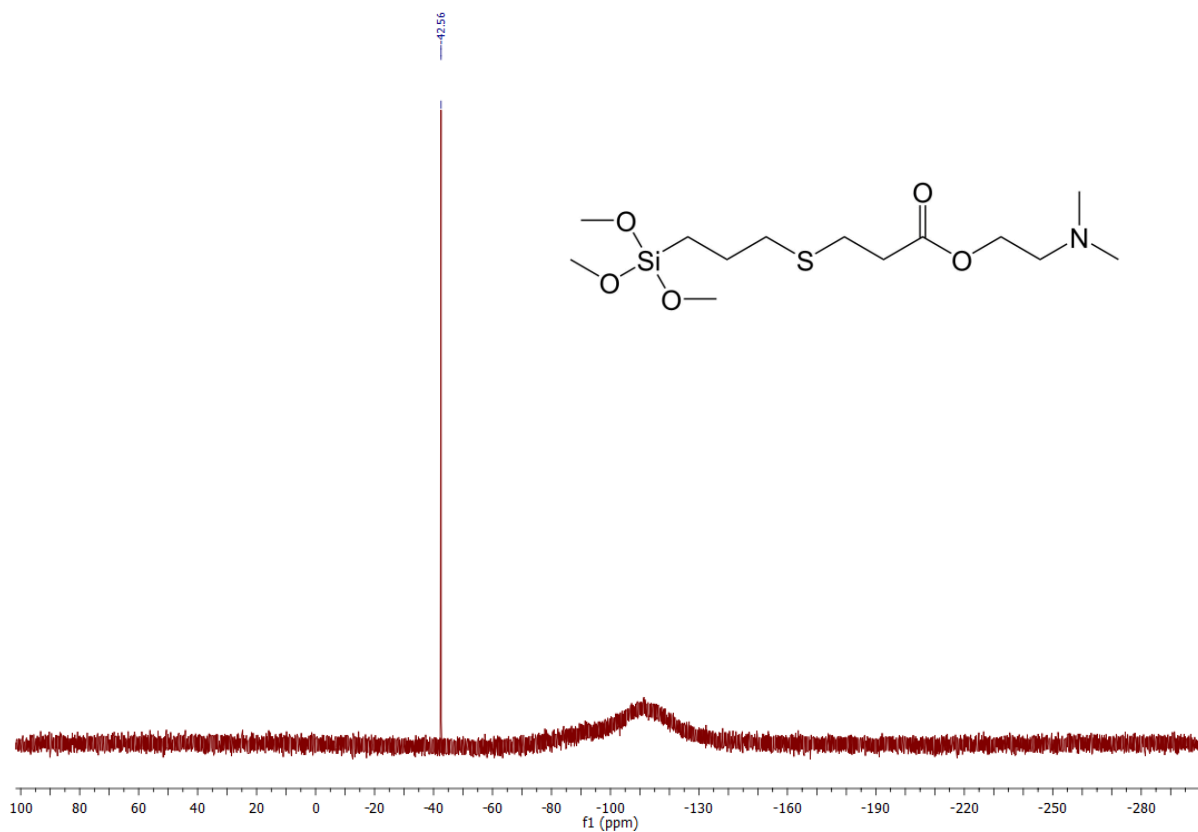

Figure 47. <sup>29</sup>Si NMR spectrum of 3l.

### FT-IR spectrum

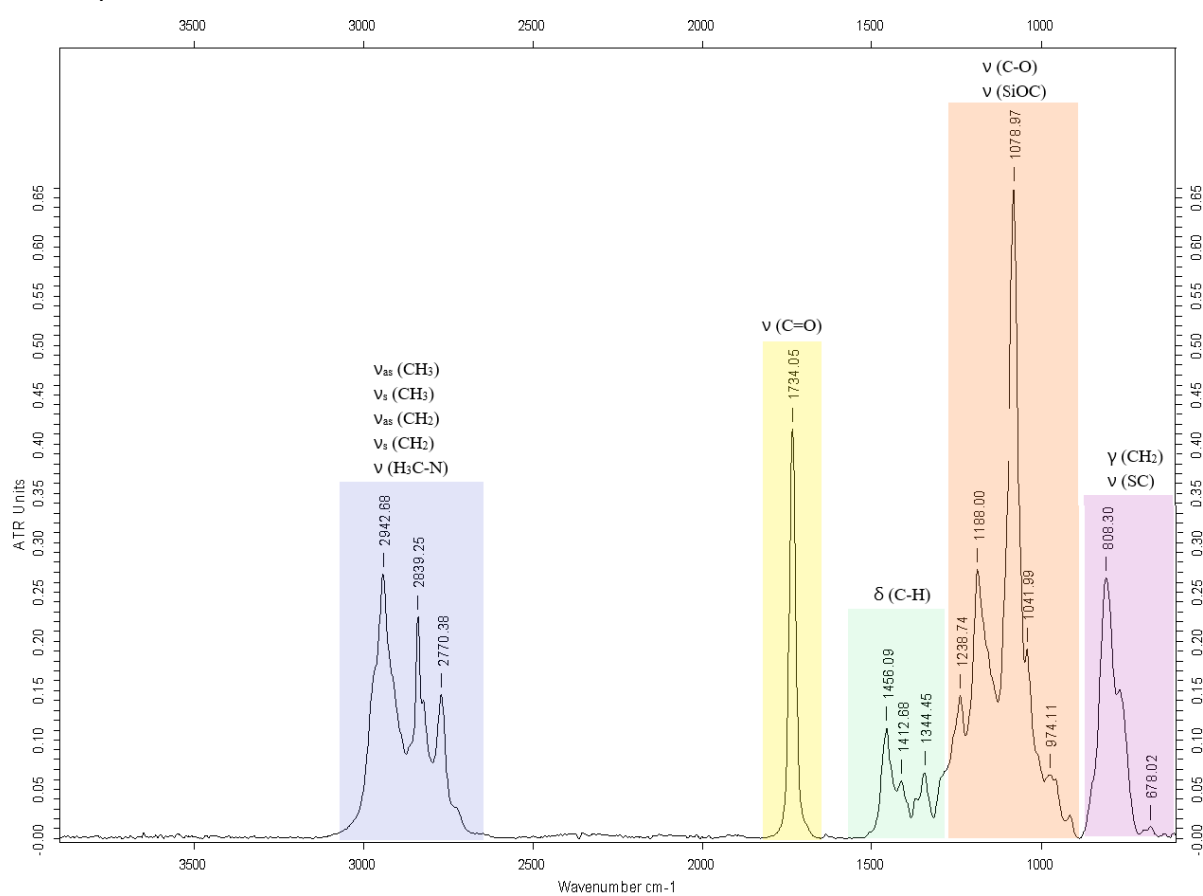

Figure 48. FT-IR NMR spectrum of 3l.

**3m**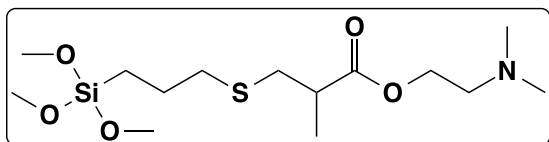

Product characterization

**$^1\text{H}$  NMR** (400 MHz,  $\text{CDCl}_3$ )  $\delta$  4.15 (t,  $J=5.8$  Hz, 2H,  $\text{C}(\text{O})\text{OCH}_2$ ); 3.50 (s, 9H,  $\text{Si}(\text{OCH}_3)_3$ ); 2.75 (dd,  $J=12.7, 7.1$  Hz, 1H), 2.62 (sext,  $J=6.9$  Hz, 1H), 2.55-2.44 (m, 5H) ( $\text{CH}_2\text{SCH}_2\text{CH}$ ,  $\text{CH}_2\text{N}(\text{CH}_3)_2$ ); 2.23 (s, 6H,  $\text{N}(\text{CH}_3)_2$ ); 1.62 (m, 2H,  $\text{SiCH}_2\text{CH}_2$ ); 1.18 (d,  $J=6.9$  Hz, 3H,  $\text{CH}_3$ ); 0.67 (m, 2H,  $\text{SiCH}_2$ ) ppm.

**$^{13}\text{C}$  NMR** (101 MHz,  $\text{CDCl}_3$ )  $\delta$  175.20 ( $\text{C}=\text{O}$ ); 62.37 ( $\text{C}(\text{O})\text{OCH}_2$ ); 57.71 ( $\text{CH}_2\text{N}(\text{CH}_3)_2$ ); 50.54 ( $\text{Si}(\text{OCH}_3)_3$ ); 45.67 ( $\text{N}(\text{CH}_3)_2$ ); 40.17 ( $\text{CH}_2\text{SCH}_2\text{CH}$ ); 35.53, 35.32 ( $\text{CH}_2\text{SCH}_2$ ); 22.99 ( $\text{SiCH}_2\text{CH}_2$ ); 16.84 ( $\text{CH}_3$ ); 8.57 ( $\text{SiCH}_2$ ) ppm.

**$^{29}\text{Si}$  NMR** (79 MHz,  $\text{CDCl}_3$ )  $\delta$  -42.53 ( $\text{Si}(\text{OCH}_3)_3$ ) ppm.

NMR spectra

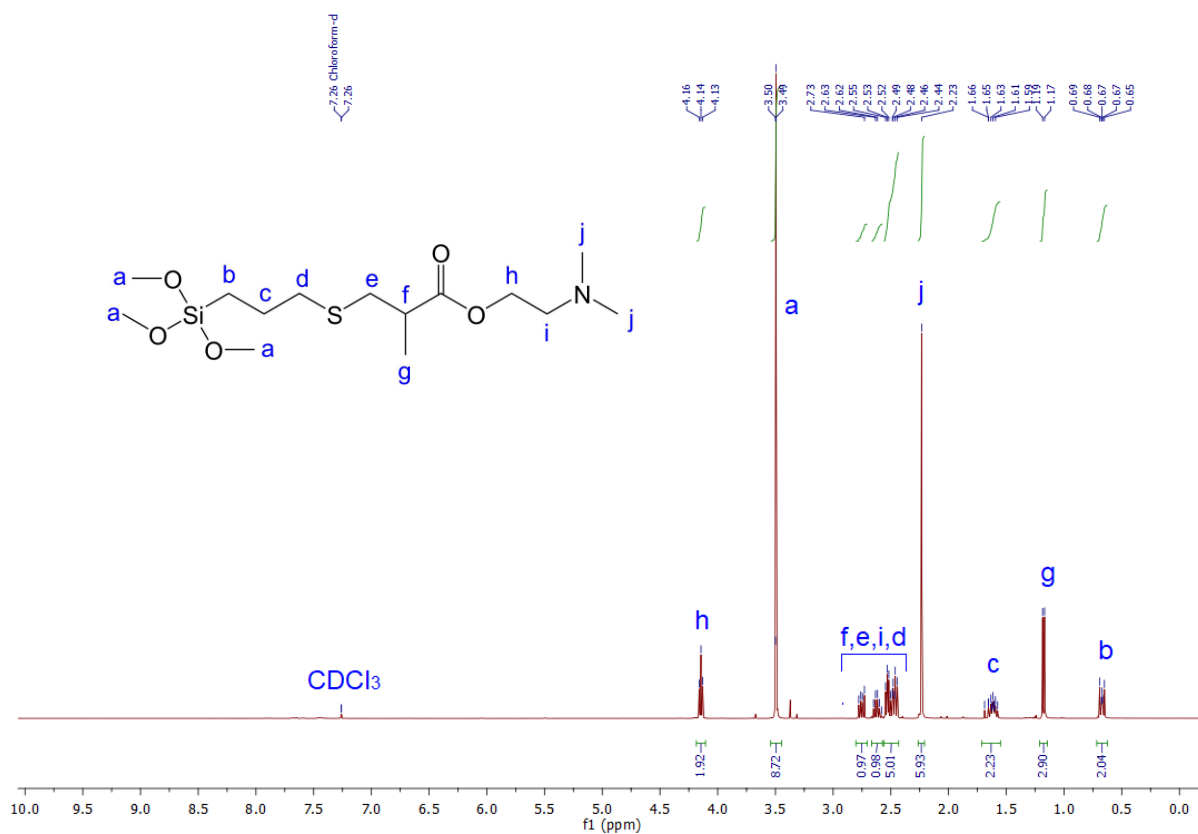**Figure 49.**  $^1\text{H}$  NMR spectrum of 3m.

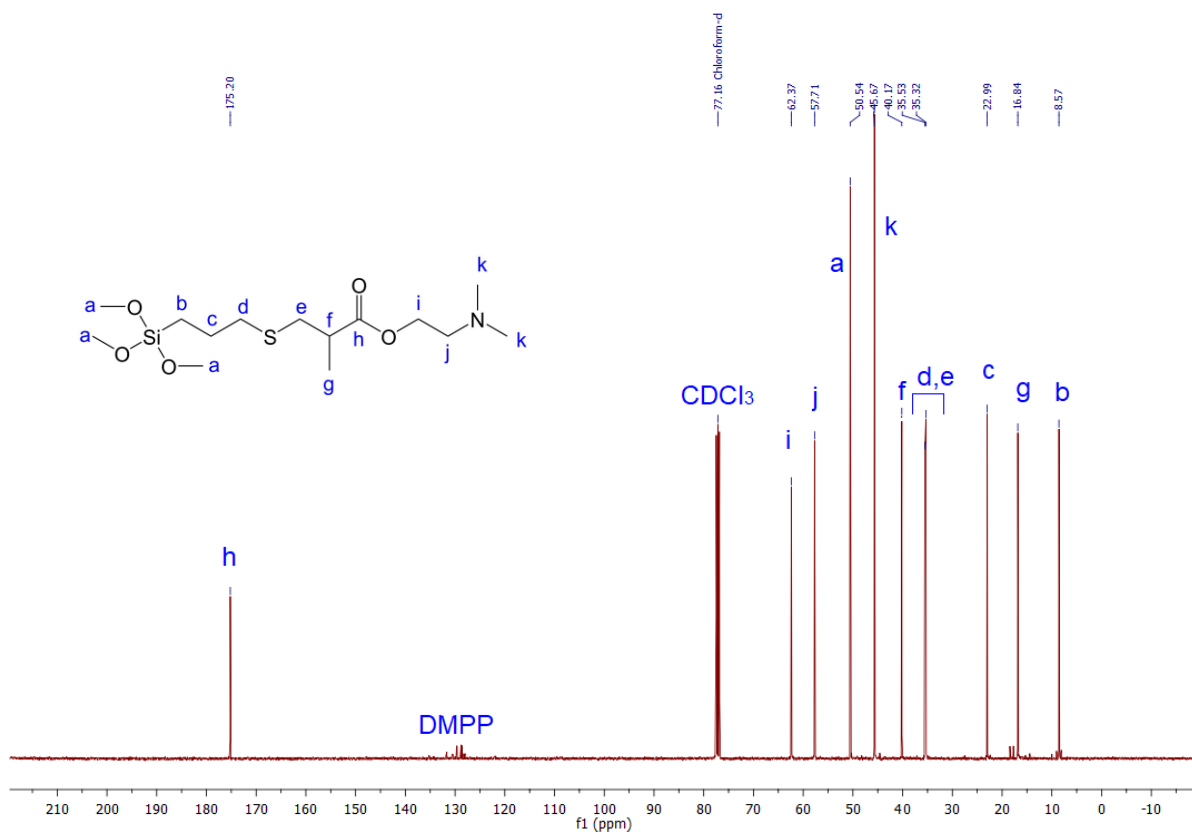

Figure 50. <sup>13</sup>C NMR spectrum of 3m.

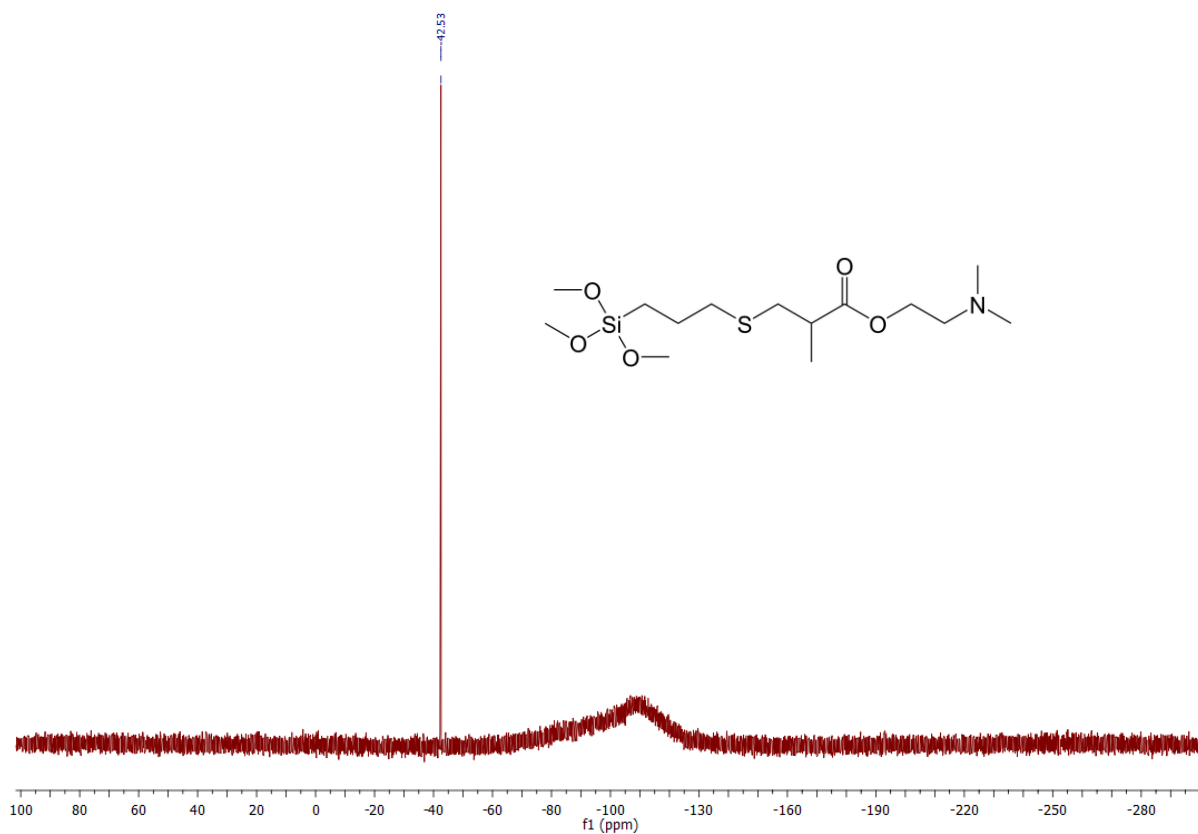

Figure 51. <sup>29</sup>Si NMR spectrum of 3m.

## FT-IR spectrum

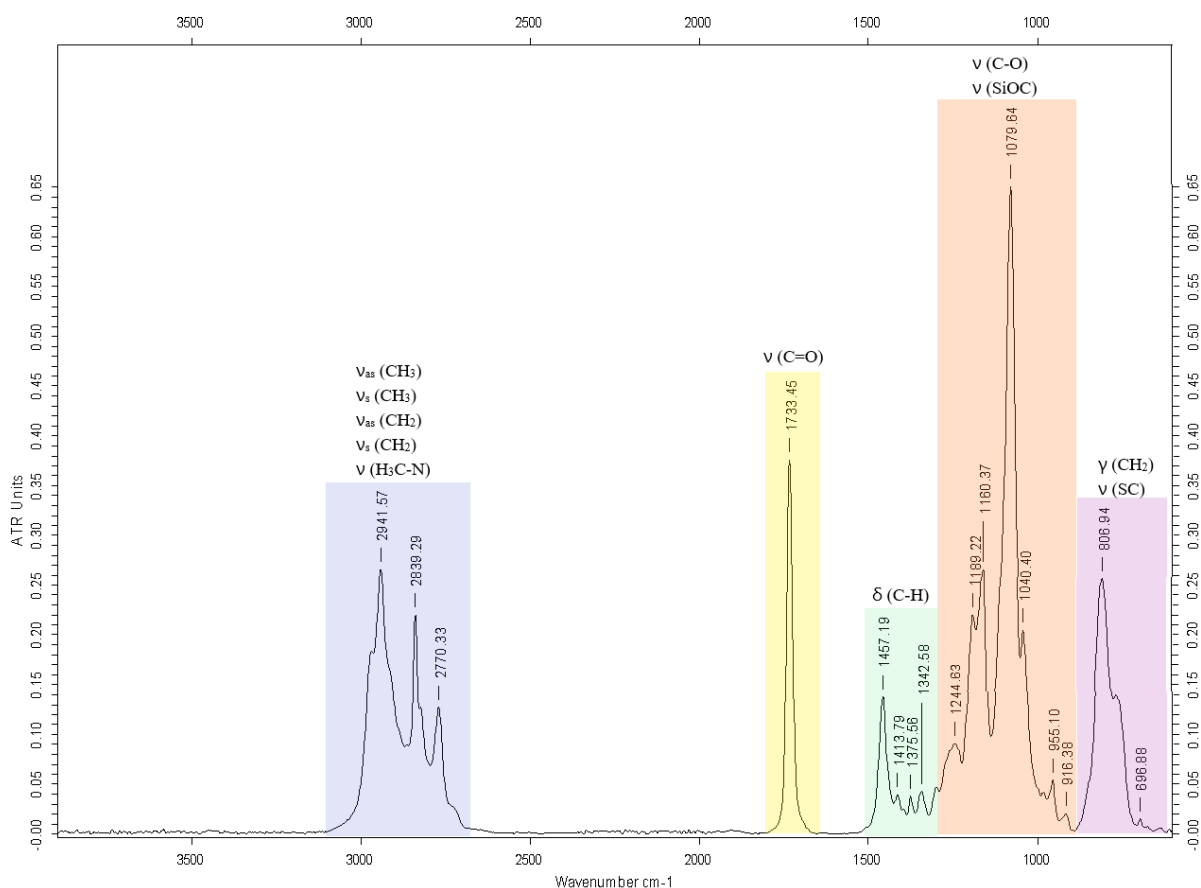

Figure 52. FT-IR NMR spectrum of 3m.

## 3n

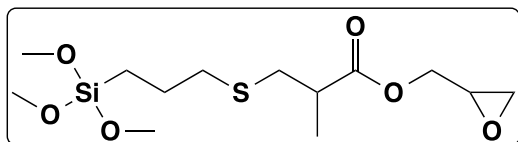

### Product characterization

$^1\text{H NMR}$  (600 MHz,  $\text{CDCl}_3$ )  $\delta$  4.38 (dt,  $J=12.3, 3.2$  Hz, 1H,  $\text{C}(\text{O})\text{CH}_2\text{CHCH}_2$ ); 3.90 (ddd,  $J=16.0, 12.3, 6.2$  Hz, 1H,  $\text{C}(\text{O})\text{CH}_2\text{CHCH}_2$ ); 3.51 (s, 9H,  $\text{Si}(\text{OCH}_3)_3$ ); 3.16 (m, 1H,  $\text{CH}_2\text{CHCH}_2$ ); 2.80-2.76 (m, 2H), 2.67 (m, 1H), 2.61 (m, 1H), 2.53 (m, 1H), 2.49 (m, 2H) ( $\text{CH}_2\text{SCH}_2\text{CH}$ ,  $\text{CHOCH}_2$ ); 1.63 (m, 2H,  $\text{SiCH}_2\text{CH}_2$ ); 1.21 (dd,  $J=7.0, 1.6$  Hz, 3H,  $\text{CH}_3$ ); 0.69 (m, 2H,  $\text{SiCH}_2$ ) ppm.  $^{13}\text{C NMR}$  (151 MHz,  $\text{CDCl}_3$ )  $\delta$  174.88 (C=O); 65.03 (d) ( $\text{C}(\text{O})\text{CH}_2$ ); 50.54 ( $\text{Si}(\text{OCH}_3)_3$ ); 49.34 (d) ( $\text{C}(\text{O})\text{OCH}_2\text{CH}$ ); 44.62 (d) ( $\text{C}(\text{O})\text{OCH}_2\text{CHCH}_2$ ); 40.22 (d) ( $\text{CH}_2\text{SCH}_2\text{CH}$ ); 35.55, 35.27 (d) ( $\text{CH}_2\text{SCH}_2$ ); 23.01 ( $\text{SiCH}_2\text{CH}_2$ ); 16.83 (d) ( $\text{CH}_3$ ); 8.55 ( $\text{SiCH}_2$ ) ppm.  $^{29}\text{Si NMR}$  (119 MHz,  $\text{CDCl}_3$ )  $\delta$  -42.51 ( $\text{Si}(\text{OCH}_3)_3$ ) ppm.

# NMR spectra

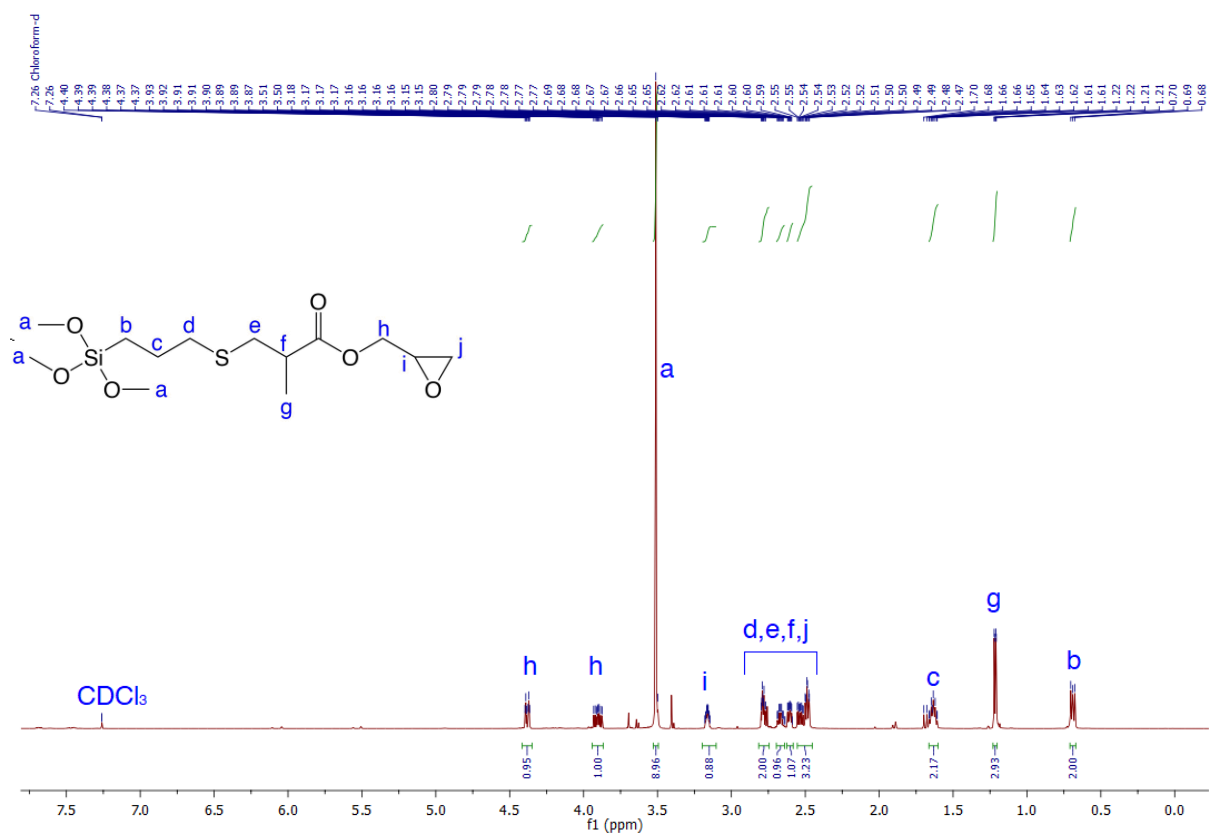

**Figure 53.**  $^1\text{H}$  NMR spectrum of 3n.

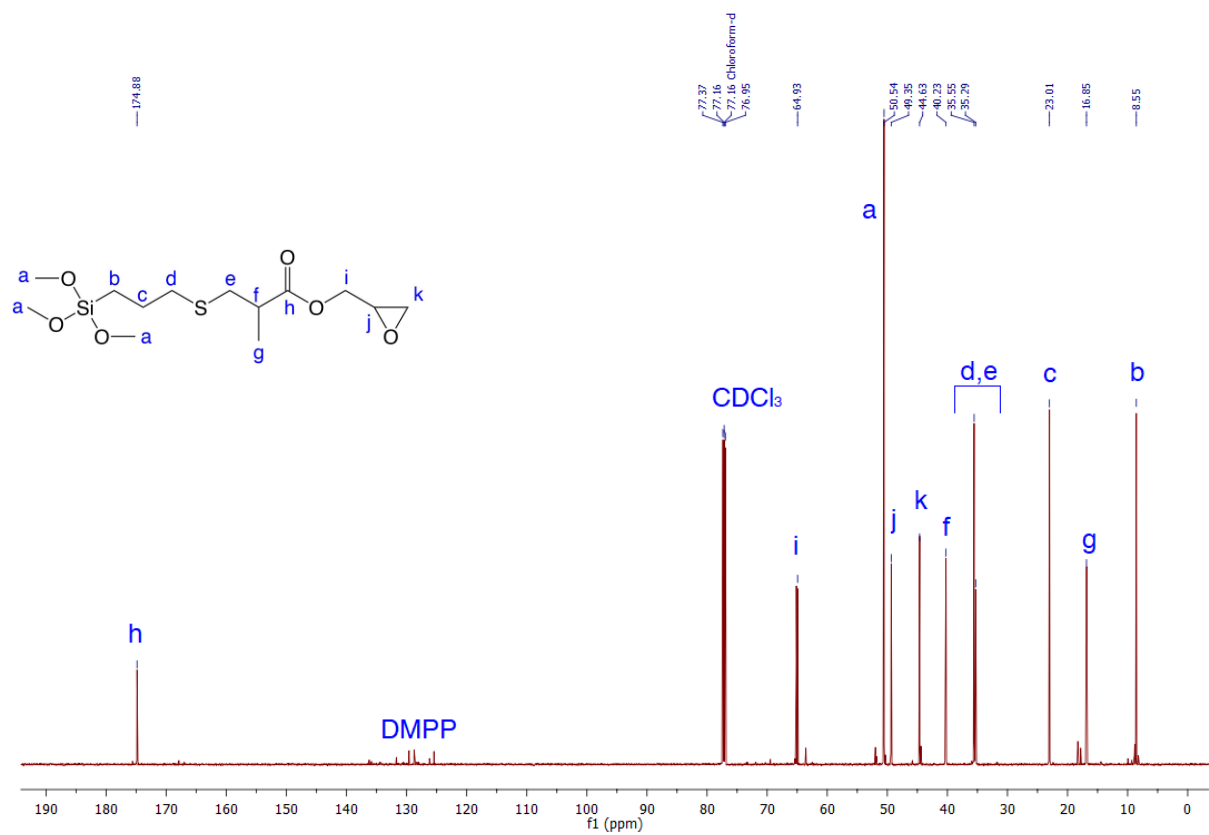

**Figure 54.**  $^{13}\text{C}$  NMR spectrum of 3n.

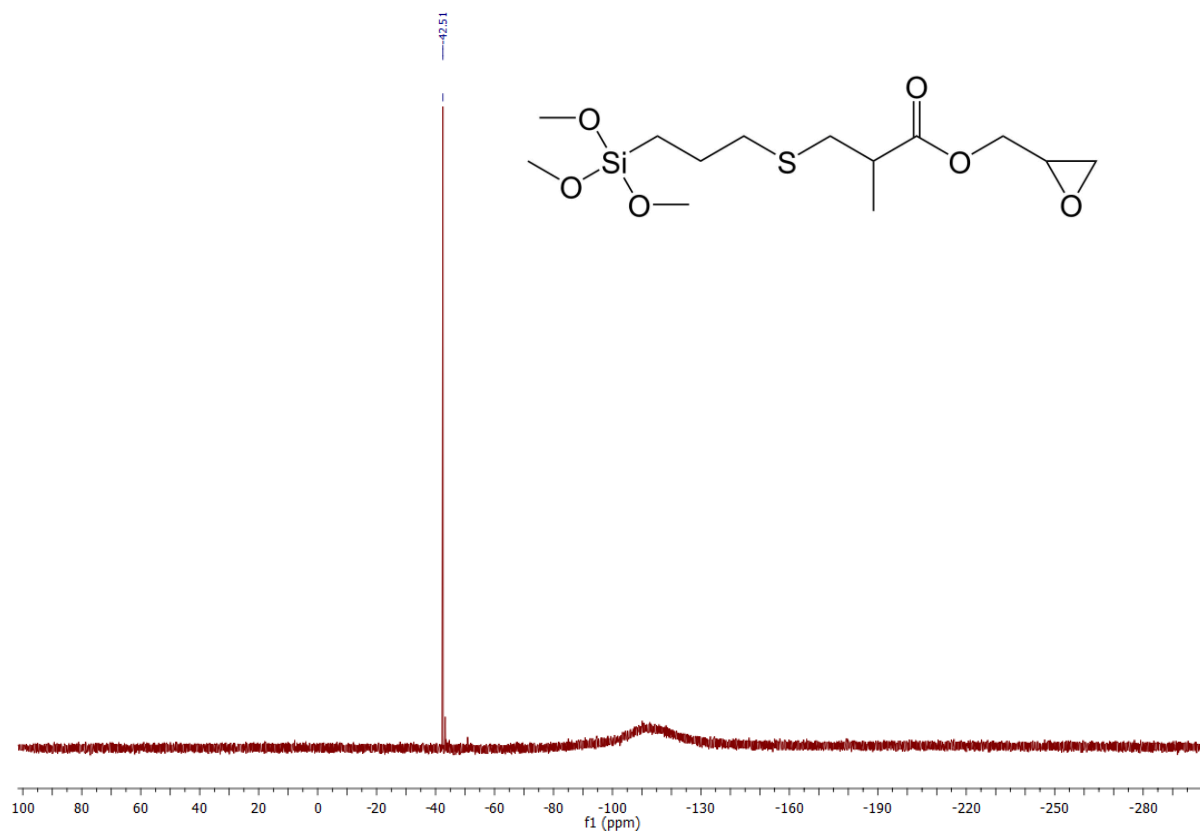

Figure 55.  $^{29}\text{Si}$  NMR spectrum of 3n.

FT-IR spectrum

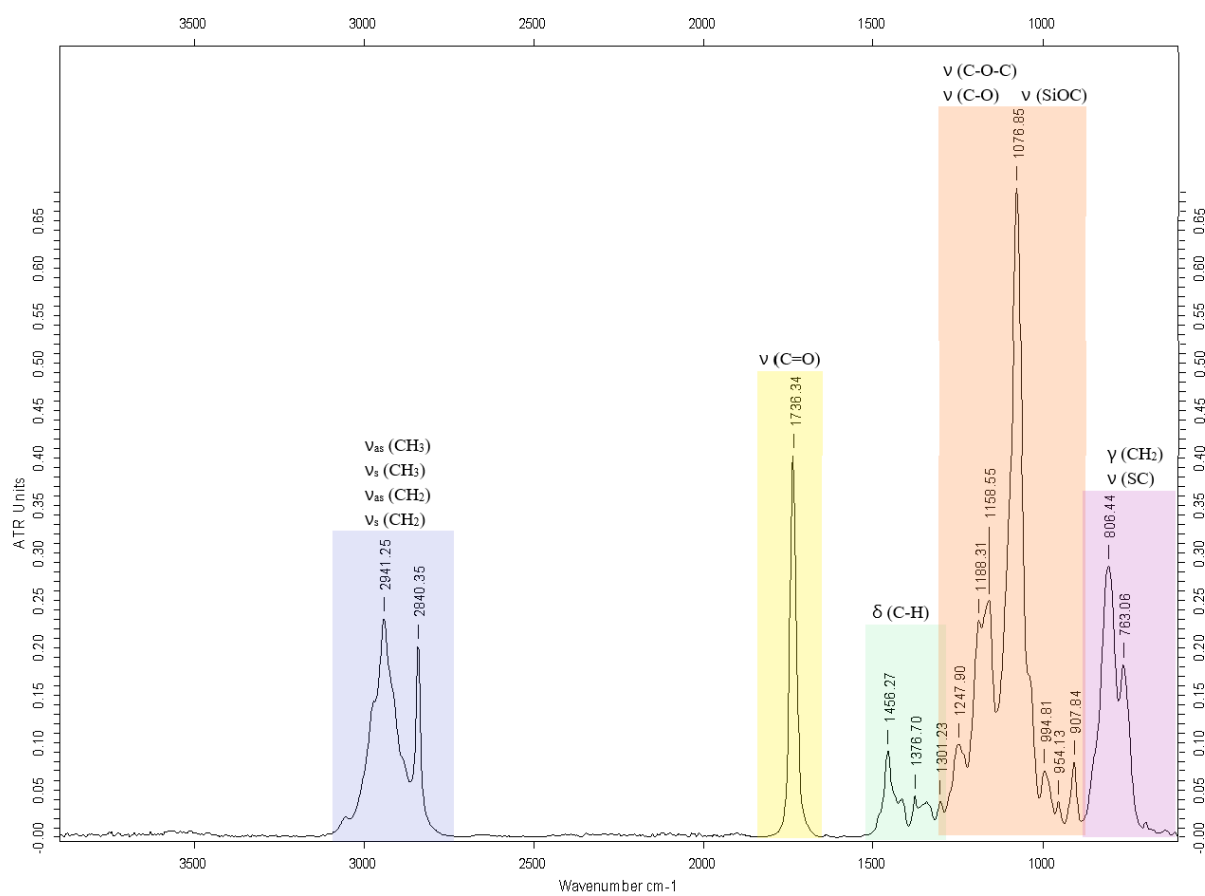

Figure 56. FT-IR NMR spectrum of 3n.

**3o**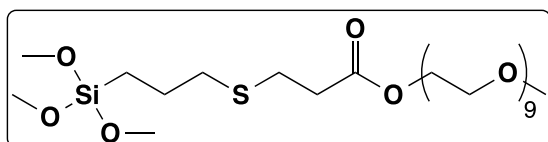

### Product characterization

**<sup>1</sup>H NMR** (400 MHz, CDCl<sub>3</sub>) δ 4.19 (m, 2H, (O)OCH<sub>2</sub>); 3.64 (m, 2H, C(O)CH<sub>2</sub>CH<sub>2</sub>); 3.61 – 3.56 (m, 32H, CH<sub>2</sub>); 3.51 (s, 9H, (Si(OCH<sub>3</sub>)<sub>3</sub>); 3.32 (s, 3H, CH<sub>3</sub>); 2.71 (m, 2H), 2.57 (m, 2H), 2.48 (m, 2H) (CH<sub>2</sub>SCH<sub>2</sub>CH<sub>2</sub>); 1.64 (m, 2H, SiCH<sub>2</sub>CH<sub>2</sub>); 0.69 (m, 2H, SiCH<sub>2</sub>) ppm. **<sup>13</sup>C NMR** (101 MHz, CDCl<sub>3</sub>) δ 172.05 (C=O); 72.05 (C(O)CH<sub>2</sub>CH<sub>2</sub>); 70.69 (CH<sub>2</sub>); 69.19 (CH<sub>2</sub>); 63.89 (C(O)CH<sub>2</sub>); 59.13 (CH<sub>3</sub>); 50.65 (Si(OCH<sub>3</sub>)<sub>3</sub>); 35.12, 35.08 (CH<sub>2</sub>SCH<sub>2</sub>); 26.83 (CH<sub>2</sub>SCH<sub>2</sub>CH<sub>2</sub>); 23.02 (SiCH<sub>2</sub>CH<sub>2</sub>); 8.65 (SiCH<sub>2</sub>) ppm. **<sup>29</sup>Si NMR** (79 MHz, CDCl<sub>3</sub>) δ -42.55 (Si(OCH<sub>3</sub>)<sub>3</sub>) ppm.

### NMR spectra

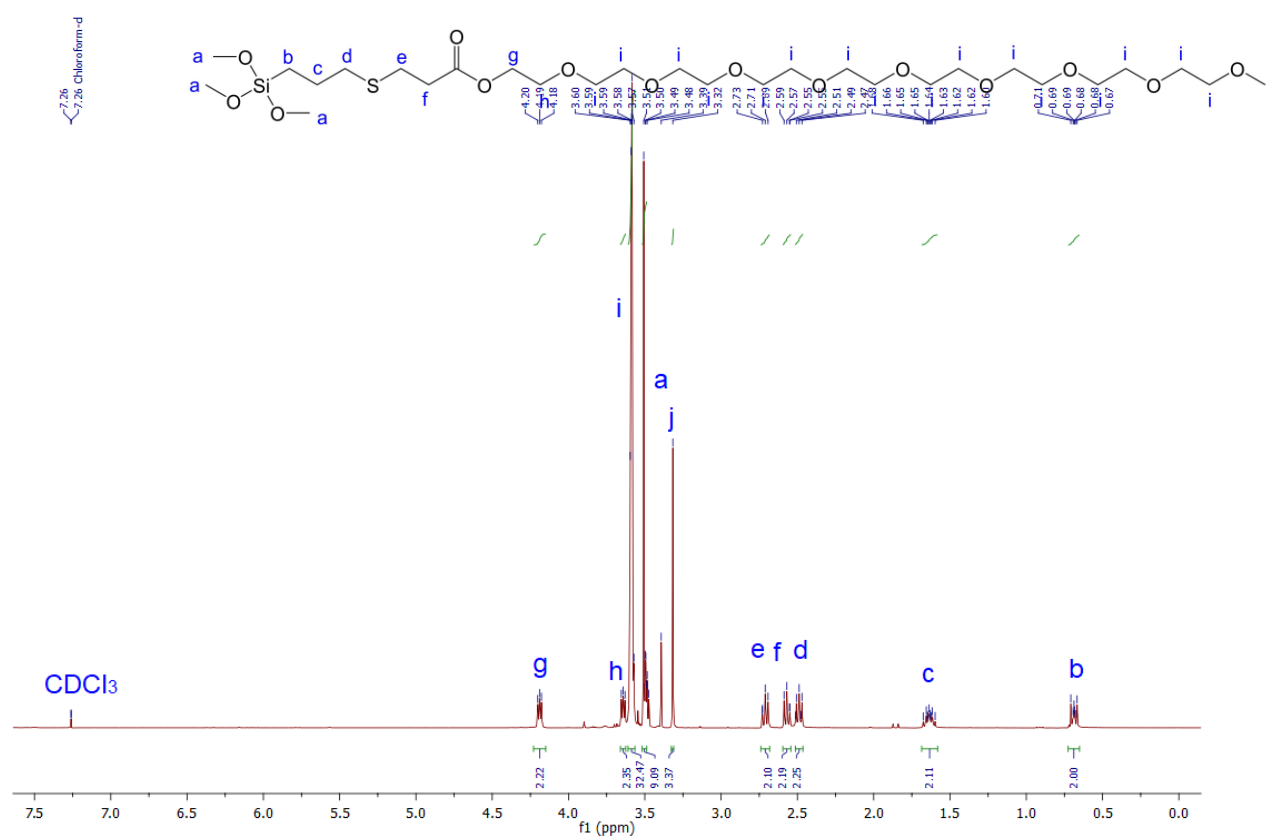

**Figure 57.** <sup>1</sup>H NMR spectrum of 3o.

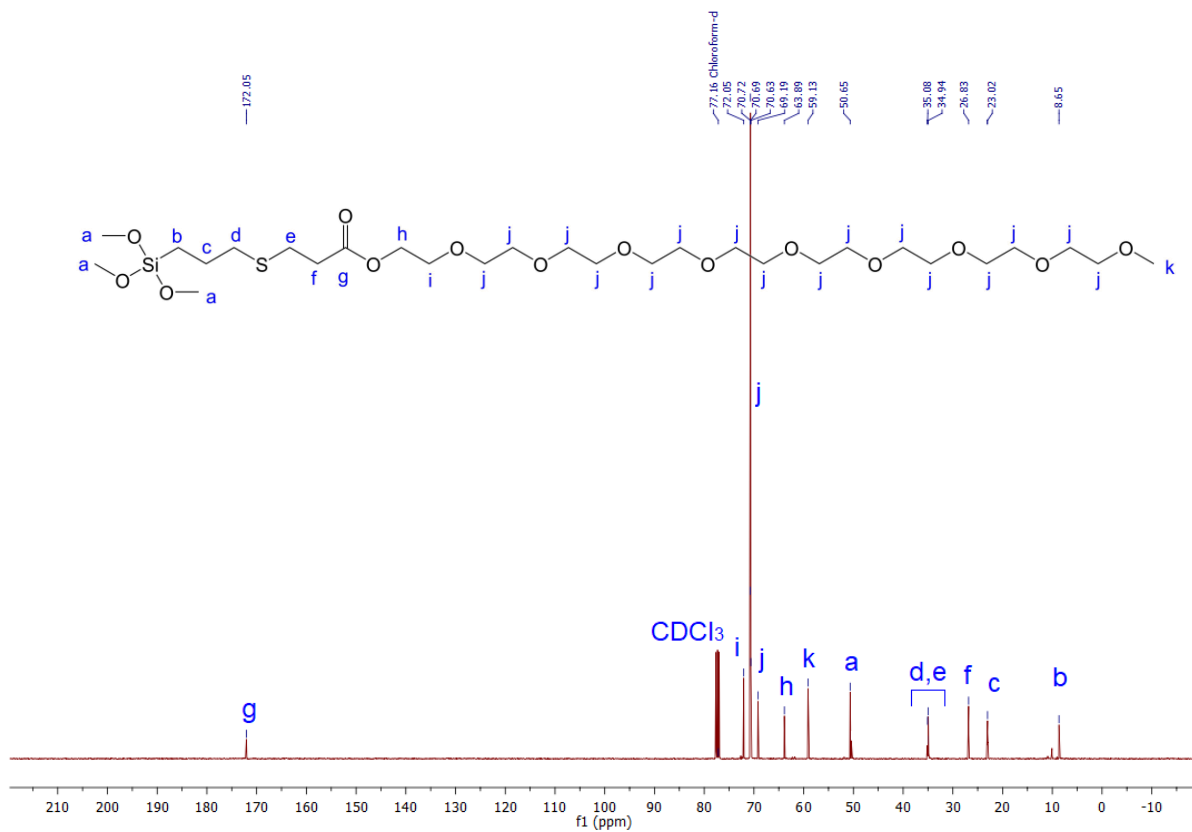

Figure 58. <sup>13</sup>C NMR spectrum of 3o.

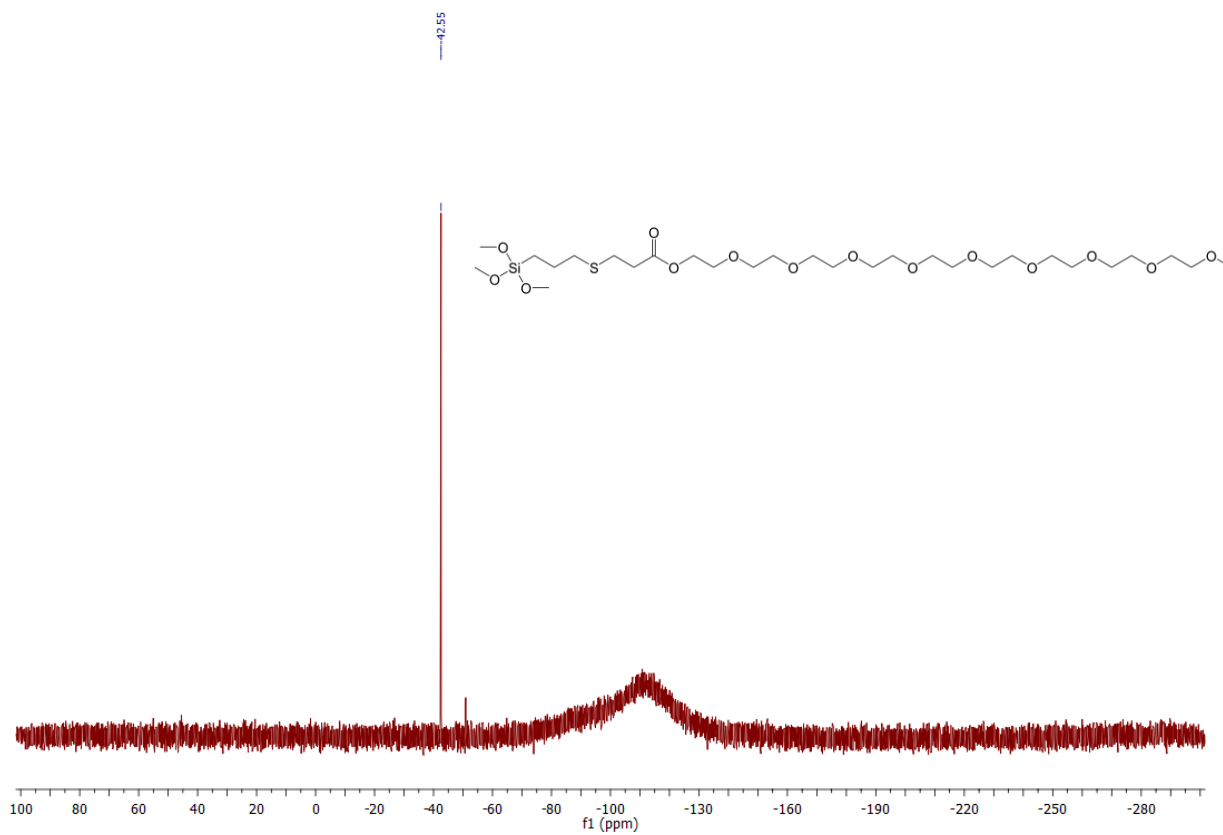

Figure 59. <sup>29</sup>Si NMR spectrum of 3o.



## FT-IR spectrum

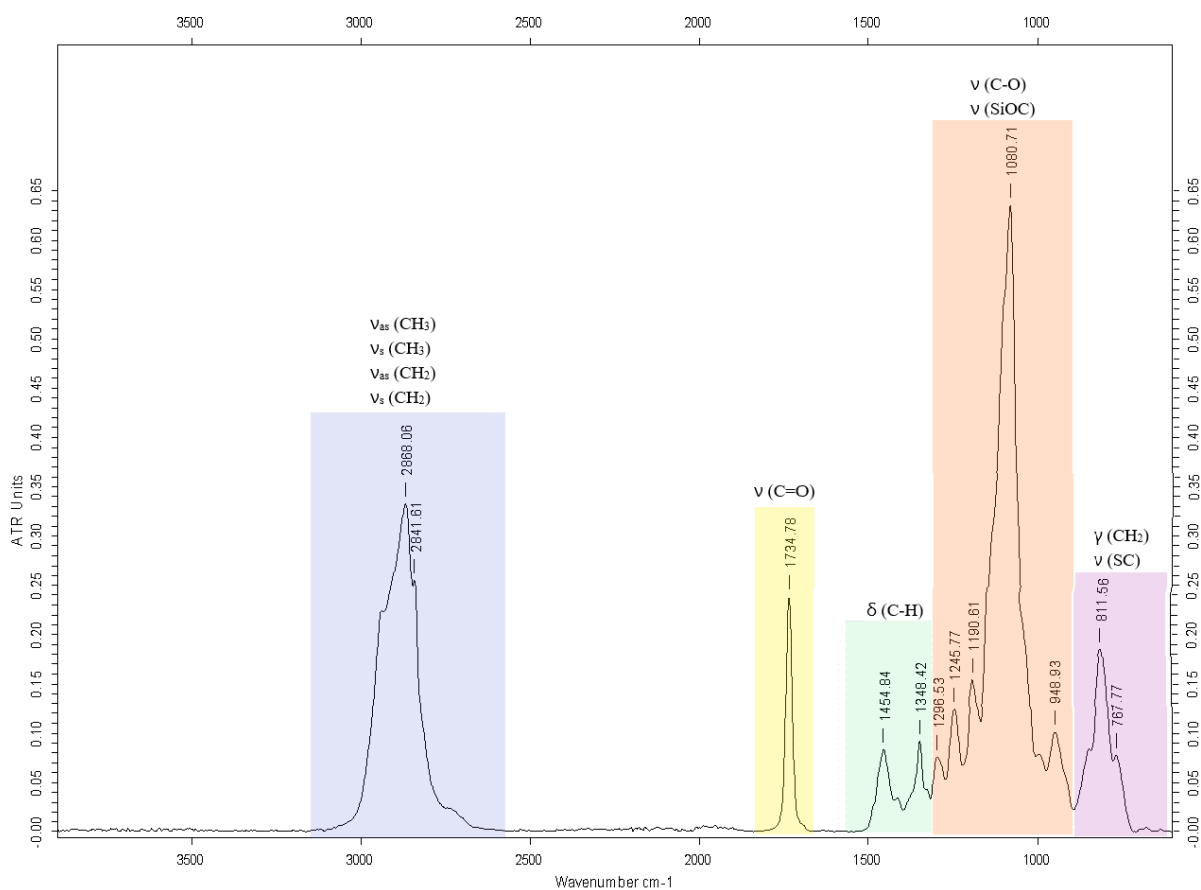

**Figure 60.** FT-IR NMR spectrum of 3o.

**Table S1.** Comparison of conditions of reactions and yields for the obtained alkoxyasilanes with the literature data

| Product                                                                                          | Current research                                                  | Ref.                                                                                                                                                                 |
|--------------------------------------------------------------------------------------------------|-------------------------------------------------------------------|----------------------------------------------------------------------------------------------------------------------------------------------------------------------|
| <b>3c</b><br>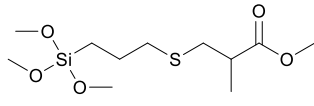 | <i>Conditions:</i> DMPP (0.5 wt.%), 1h<br><br><i>Yield:</i> 93%   | <i>Conditions:</i> AIBN (5 mol%), ethanol, 24h, reflux, inert atmosphere<br><br><i>Yield:</i> 95%<br><br>[S1] M. Sato, S. Kitajima, US 2018362552A1, KRI, Inc., 2018 |
| <b>3l</b><br> | <i>Conditions:</i> DMPP (0.5 wt.%), 0.5h<br><br><i>Yield:</i> 98% | <i>Conditions:</i> AIBN (2 mol%), ethyl acetate, 80°C, 24h, inert atmosphere<br><br><i>Yield:</i> quantitative<br><br>[S1]                                           |
| <b>3m</b>                                                                                        | <i>Conditions:</i> DMPP (2 wt.%), 1h                              | <i>Conditions:</i> AIBN (2 mol%), ethyl acetate, 80°C, 24h, inert atmosphere                                                                                         |

|                                                                                   |                   |                           |
|-----------------------------------------------------------------------------------|-------------------|---------------------------|
| 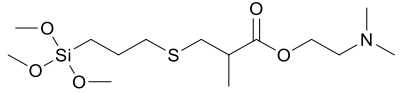 | <i>Yield: 95%</i> | <i>Yield: 93%</i><br>[S1] |
|-----------------------------------------------------------------------------------|-------------------|---------------------------|

**Table S2.** Other examples (conditions and yields) of alkoxy silanes obtained from 3-mercaptopropyltrialkoxysilane and functional group-containing (meth)acrylic acid esters

| Product                                                                             | Conditions                                                          | Yield        | Ref.                                                                                                                                                                                                                       |
|-------------------------------------------------------------------------------------|---------------------------------------------------------------------|--------------|----------------------------------------------------------------------------------------------------------------------------------------------------------------------------------------------------------------------------|
| 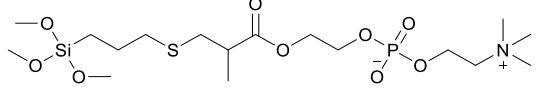   | Diisopropylamine (4 mol%),<br>EtOH, rt, 24h                         | 80%          | [S2] J. Michinishi, Y. Hishida, Y. Yoshitetsu, JP 2015 110534A, NOF Corporation, 2015                                                                                                                                      |
|   | Benzophenone (2 mol%),<br>EtOH, rt, UV-irradiation (300 nm), 15 min | quantitative | [S3] M. E. Lee, L. Lei, KR 2016/107443A, University Industry Foundation Yonsei University Wonju Campus, 2016<br>[S4] M. E. Lee, L. Lei, KR 201710417A, University Industry Foundation Yonsei University Wonju Campus, 2017 |
|  | Diisopropylamine (4 mol%),<br>MeOH, rt, 16h                         | -            | [S5] S. Takamatsu, R. Matsuno, S. Kumagai, Y. Kokubo, K. Hashimoto, H. Yoshikawa, A. Takahara, H. Otsuka, EP 2832736A1, Sumitomo Riko Co. Ltd. National University Corporation Kyushu University, 2015                     |
|  | Et <sub>3</sub> N (5 mol%),<br>EtOH, rt, 24h                        | 96%          | [S6] M. Umezaki, D. Sakuma, T. Nishino, T. Kishioka, Y. Hiroi,                                                                                                                                                             |

|                                                                                    |                                                             |     |                                                                                                                                                                      |
|------------------------------------------------------------------------------------|-------------------------------------------------------------|-----|----------------------------------------------------------------------------------------------------------------------------------------------------------------------|
|                                                                                    |                                                             |     | S. Kimura, T. Ohashi, Y. Usui, US 2014370182A1, M. Umezaki, D. Sakuma, T. Nishino, T. Kishioka, Y. Hiroi, S. Kimura, T. Ohashi, Y. Usui, Nissan Chemical Corp., 2014 |
| 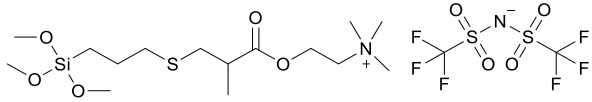  | Acetonitrile, rt, 5h                                        | 97% | [S7] Y. Tanaka, T. Jinno, CN 103596965B, Koei Chemical Co., 2016                                                                                                     |
|   | AIBN (1 mol%), 80°C, inert atmosphere, overnight            | -   | [S8] M. Sato, S. Kitajima, JP 2020152646A, KRI, Inc. 2020                                                                                                            |
|  | AIBN (2 mol%), ethyl acetate, 24h, reflux, inert atmosphere | 97% | [S9] M. Sato, S. Kitajima, JP 2018115171A, KRI, Inc. 2018                                                                                                            |
